# Supplementary material for: Post-metallation functionalization of the [(C^C)Au(P^P)]+ scaffold through a hydrothiolation reaction
Source: Royal Society of Chemistry journal article supplement (doi:10.1039/d4dt02092h), 2024-01-01
Supplement: d4dt02092h1.pdf [file d4dt02092h1.pdf]

## Electronic Supplementary Information

*for*

### Post-metallation functionalization of the $[(C^{\wedge}C)Au(P^{\wedge}P)]^+$ scaffold through a hydrothiolation reaction

Jeannine Yang,<sup>a</sup> Clément Soep,<sup>a</sup> Jérémy Forté,<sup>a</sup> Héloïse Dossmann<sup>a</sup> and Benoît Bertrand<sup>a</sup>

<sup>a</sup> Sorbonne Université, CNRS, Institut Parisien de Chimie Moléculaire, IPCM, F-75005 Paris, France  
Email: benoit.bertrand@sorbonne-universite.fr

| <b>Content</b>                                                                                                                                         | <b>Page</b> |
|--------------------------------------------------------------------------------------------------------------------------------------------------------|-------------|
| <b>Experimental part</b>                                                                                                                               | S3-12       |
| <b>Table S1:</b> Crystallographic data for <b>1</b> , <b>2a</b> , <b>2e</b> and <b>2f</b> .                                                            | S13         |
| <b>Figure S1.</b> Potential energy diagram of the reaction of dppe with PhSH. Relative energies are in kcal/mol and given relatively to the reactants. | S14         |
| <b>Table S2.</b> Calculated electronic and zero-point energies (in hartrees, H) of all compounds studied in this work                                  | S14         |
| <b>NMR spectra</b>                                                                                                                                     | S15-39      |
| <b>Table S3.</b> Cartesian coordinates (x,y,z) of optimized geometries of compounds studied in this work.                                              | S41         |
| <b>References</b>                                                                                                                                      | S47         |

## Experimental part

### General remarks

Anhydrous solvents were obtained by standard procedures. Chemicals were purchased from various manufacturers and used as received.  $^1\text{H}$ ,  $^{13}\text{C}$  and  $^{19}\text{F}$  NMR spectra were acquired Bruker 300 or 400 MHz spectrometers. Chemical shifts ( $\delta$ ) are expressed as ppm referenced to the solvent residual signal. Splitting patterns are expressed as follows: s, singlet; d, doublet; t, triplet; m, multiplet. Mass spectrometry was carried out at the Mass Spectrometry Sciences Sorbonne University (MS3U) platform of Sorbonne Université (Paris). Elemental analysis were performed at the Service Chromato-Masse Microanalyse of the Université Paris-Saclay (Châtenay-Malabry, France). Dimeric gold precursor has been synthesized according to a reported procedure.<sup>1</sup>

### Synthesis of complex 1

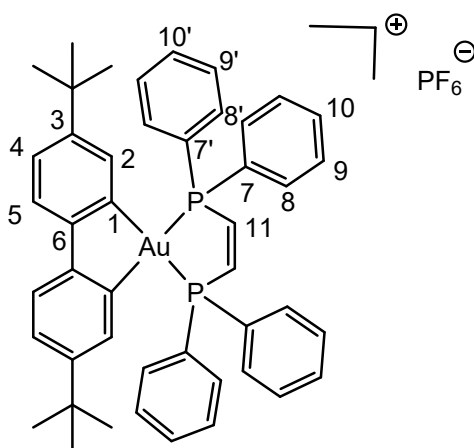

In a Schlenk tube under  $\text{N}_2$  atmosphere, the **gold dimer** (200 mg, 0.2 mmol) is suspended into degassed dichloromethane (20 mL). **Cis-1,2-bis(diphenylphosphino)ethylene** (159 mg, 0.4 mmol) is added and the reaction is kept under  $\text{N}_2$  atmosphere at room temperature for 2 h. **Potassium hexafluorophosphate** (184 mg, 1.0 mmol) is dissolved into **degassed** acetonitrile (5 mL) and added onto the mixture. The reaction is kept under  $\text{N}_2$  atmosphere at room temperature for 2 h. Some dichloromethane (15 mL) is added into the mixture before filtration. The reaction mixture was filtered through a **glass frit** with Celite and the obtained solution was concentrated under reduced pressure. Upon addition of a large amount of  $\text{Et}_2\text{O}$ , a pale yellow precipitate was formed which was recovered and gave after drying the pure product (350 mg, 0.35 mmol, 87 % yield).  $^1\text{H}$  NMR ( $\text{CDCl}_3$ , 300 MHz, 300 K):  $\delta$  7.97 (d,  $^2J_{\text{P-H}} = 20.8$  Hz, 2 H,  $\text{H}^{11}$ ), 7.86-7.77 (m, 8 H,  $\text{H}^9 + \text{H}^{9'}$ ), 7.69-7.56 (m, 12 H,  $\text{H}^8 + \text{H}^{8'} + \text{H}^{10} + \text{H}^{10'}$ ), 7.48 (m, 2 H,  $\text{H}^5$ ), 7.40 (dd,  $^3J_{\text{H-H}} = 8$  Hz,  $^4J_{\text{H-H}} = 2$  Hz, 2 H,  $\text{H}^4$ ), 7.19 (dm,  $^3J_{\text{P-H}} = 8$  Hz, 2 H,  $\text{H}^2$ ), 0.87 (s, 18 H, tBu).  $^{13}\text{C}\{^1\text{H}\}$  Jmod NMR ( $\text{CDCl}_3$ , 75.5 MHz, 300 K):  $\delta$  163.2 (dd,  $^2J_{\text{P-C}} = 118$  Hz,  $^2J_{\text{P-C}} = 13$  Hz,  $\text{C}^1$ ), 152.0 (s,  $\text{C}^6$ ), 151.1 (t,  $^4J_{\text{P-C}} = 6$  Hz,  $\text{C}^3$ ), 144.9 (m,  $\text{C}^{11}$ ), 136.1 (t,  $^3J_{\text{P-C}} = 8$  Hz,  $\text{C}^2$ ), 134.1 (s,  $\text{C}^{10} + \text{C}^{10'}$ ), 134.0 (m,  $\text{C}^8 + \text{C}^{8'}$ ), 130.6 (m,  $\text{C}^9 + \text{C}^{9'}$ ), 125.7 (s,  $\text{C}^4$ ), 125.6 (s,  $\text{C}^4$ ), 123.3 (d,  $^1J_{\text{P-C}} = 65$  Hz,  $\text{C}^{7/7'}$ ), 123.2 (d,  $^1J_{\text{P-C}} = 65$  Hz,  $\text{C}^{7/7'}$ ), 122.1 (m,  $\text{C}^5$ ), 34.9 (s,  $\text{C}_{\text{quat.tBu}}$ ), 31.0 (s,  $\text{CH}_{3\text{-tBu}}$ ).  $^{31}\text{P}\{^1\text{H}\}$  NMR ( $\text{CDCl}_3$ , 121.5 MHz, 300 K):  $\delta$  63.4 (s, 2 P, P-Au), -144.3 (h,  $^1J_{\text{P-F}} = 716$  Hz, 1 P,  $\text{PF}_6$ ). ESI-MS (MeCN) *positive mode exact mass for*  $[\text{C}_{46}\text{H}_{46}\text{P}_2\text{Au}]^+$  (857.2735): measured  $m/z$  857.2738  $[\text{M-PF}_6]^+$ . Calcd for  $\text{C}_{46}\text{H}_{46}\text{P}_2\text{AuPF}_6 \cdot \text{H}_2\text{O}$  (1020.77): C, 54.13; H, 4.74. Found: C, 53.76; H 4.70.

## Reaction conditions optimization

In a sealed tube, **1** (10 mg, 0.01 mmol) or *cis*-1,2-diphenylphosphinoethylene (4.0 mg, 0.01 mmol) is dissolved into deuterated chloroform (1 mL). **Nucleophile** (1-5 eq, 0.01-0.05 mmol) and when mentioned **NEt<sub>3</sub>** (1 eq., 0.01 mmol, 1.4  $\mu$ L) are added and the mixture is reacted at room temperature or 50 °C for 1 or 6 h. At the end of the reaction **PPh<sub>3</sub>** (1 eq., 0.01 mmol, 2.6 mg) is added into the reaction mixture as internal standard and the reaction mixture is analyzed directly by <sup>31</sup>P{<sup>1</sup>H} NMR spectroscopy. Intensity of the picks are normalized according the internal standard prior to NMR yield calculation.

## Addition of thiols on complex **1**

In a sealed tube, **1** (40 mg, 0.04 mmol) is dissolved into chloroform (4 mL). **Thiol** (0.2 mmol) and **NEt<sub>3</sub>** (5.6  $\mu$ L, 0.04 mmol) are added and the mixture is heated at 50 °C for 6 h. The products are purified by silica column (pure DCM, R<sub>f</sub>  $\approx$  0.15) to give, after drying, the pure products as pale yellow powders.

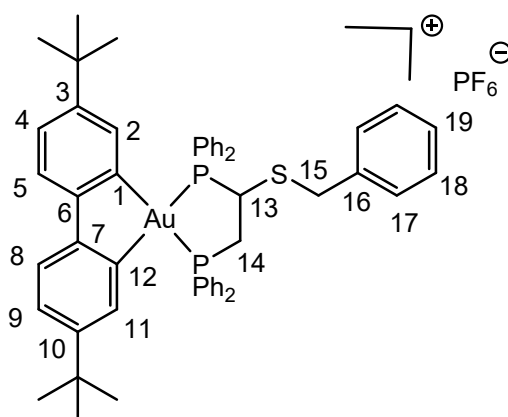

**2a: benzylmercaptan** (23  $\mu$ L, 25 mg, **0.2 mmol**), product (31 mg, 0.028 mmol, 69 % yield). <sup>1</sup>H NMR (CDCl<sub>3</sub>, 300 MHz, 300 K):  $\delta$  7.93-8.01 (m, 6 H, 6xH<sub>ortho-PPh<sub>2</sub></sub>), 7.57-7.69 (m, 12 H, 8xH<sub>meta-PPh<sub>2</sub></sub> + 4xH<sub>para-PPh<sub>2</sub></sub>), 7.38-7.45 (m, 6 H, H<sup>5</sup> + H<sup>8</sup> + H<sup>18</sup> + 2xH<sub>ortho-PPh<sub>2</sub></sub>), 7.04-7.16 (m, 6 H, H<sup>2</sup> + H<sup>11</sup> + H<sup>4</sup> + H<sup>9</sup> + H<sup>19</sup>), 6.73 (d, <sup>3</sup>J<sub>H-H</sub> = 7 Hz, 2 H, H<sup>17</sup>), 4.33-4.42 (dm, <sup>2</sup>J<sub>P-H</sub> = 30 Hz, 1 H, H<sup>13</sup>), 3.42-3.52 (m, 2 H, H<sup>14</sup> + H<sup>15</sup>), 3.18-3.30 (m, 2 H, H<sup>14</sup> + H<sup>15</sup>), 0.75 (s, 9 H, <sup>t</sup>Bu), 0.73 (s, 9 H, <sup>t</sup>Bu). <sup>13</sup>C{<sup>1</sup>H} Jmod NMR (CDCl<sub>3</sub>, 75.5 MHz, 300 K):  $\delta$  163.4 (dd, <sup>2</sup>J<sub>P-C</sub> = 110 Hz, <sup>2</sup>J<sub>P-C</sub> = 6 Hz, C<sup>1/12</sup>), 162.9 (dd, <sup>2</sup>J<sub>P-C</sub> = 112 Hz, <sup>2</sup>J<sub>P-C</sub> = 7 Hz, C<sup>1/12</sup>), 152.0 (m, C<sup>6</sup> + C<sup>7</sup>), 151.0 (m, C<sup>3</sup> + C<sup>10</sup>), 136.1-136.4 (m, C<sup>2</sup> + C<sup>11</sup>), 135.7 (d, <sup>2</sup>J<sub>P-C</sub> = 11 Hz, C<sub>ortho-PPh<sub>2</sub></sub>), 135.3 (d, <sup>2</sup>J<sub>P-C</sub> = 12 Hz, C<sub>ortho-PPh<sub>2</sub></sub>), 135.0 (s, C<sup>16</sup>), 134.3 (d, <sup>2</sup>J<sub>P-C</sub> = 12 Hz, C<sub>ortho-PPh<sub>2</sub></sub>), 134.1 (d, <sup>4</sup>J<sub>P-C</sub> = 3 Hz, C<sub>para-PPh<sub>2</sub></sub>), 134.0 (d, <sup>4</sup>J<sub>P-C</sub> = 3 Hz, C<sub>para-PPh<sub>2</sub></sub>), 133.7 (d+d, <sup>3</sup>J<sub>P-C</sub> = 12 Hz + <sup>4</sup>J<sub>P-C</sub> = 2 Hz, C<sub>meta-PPh<sub>2</sub></sub> + C<sub>para-PPh<sub>2</sub></sub>), 133.3 (d, <sup>4</sup>J<sub>P-C</sub> = 3 Hz, C<sub>para-PPh<sub>2</sub></sub>), 130.7 (d, <sup>3</sup>J<sub>P-C</sub> = 12 Hz, C<sub>meta-PPh<sub>2</sub></sub>), 130.3 (d, <sup>2</sup>J<sub>P-C</sub> = 12 Hz, C<sub>ortho-PPh<sub>2</sub></sub>), 130.1 (d, <sup>3</sup>J<sub>P-C</sub> = 12 Hz, C<sub>meta-PPh<sub>2</sub></sub>), 129.8 (d, <sup>3</sup>J<sub>P-C</sub> = 11 Hz, C<sub>meta-PPh<sub>2</sub></sub>), 129.2 (s, C<sup>17</sup>), 128.7 (s, C<sup>18</sup>), 127.6 (s, C<sup>19</sup>), 126.4 (s, C<sup>4</sup> + C<sup>9</sup>), 124.4 (d, <sup>1</sup>J<sub>P-C</sub> = 52 Hz, C<sub>ipso-PPh<sub>2</sub></sub>), 123.5 (d, <sup>1</sup>J<sub>P-C</sub> = 51 Hz, C<sub>ipso-PPh<sub>2</sub></sub>), 122.5 (d, <sup>1</sup>J<sub>P-C</sub> = 48 Hz, C<sub>ipso-PPh<sub>2</sub></sub>), 122.3 (d, <sup>1</sup>J<sub>P-C</sub> = 50 Hz, C<sub>ipso-PPh<sub>2</sub></sub>), 121.8 (d, <sup>4</sup>J<sub>P-C</sub> = 2 Hz, C<sup>5/8</sup>), 121.7 (d, <sup>4</sup>J<sub>P-C</sub> = 2 Hz, C<sup>5/8</sup>), 45.3 (dd, <sup>1</sup>J<sub>P-C</sub> = 32 Hz, <sup>2</sup>J<sub>P-C</sub> = 8 Hz, C<sup>13</sup>), 37.9 (d, <sup>3</sup>J<sub>P-C</sub> = 3 Hz, C<sup>15</sup>), 37.3 (dd, <sup>1</sup>J<sub>P-C</sub> = 35 Hz, <sup>2</sup>J<sub>P-C</sub> = 14 Hz, C<sup>14</sup>), 34.9 (s, C<sub>quat.tBu</sub>), 34.7 (s, C<sub>quat.tBu</sub>), 30.9 (s, CH<sub>3.tBu</sub>), 30.8 (s, CH<sub>3.tBu</sub>). <sup>31</sup>P{<sup>1</sup>H} NMR (CDCl<sub>3</sub>, 121.5 MHz, 300 K):  $\delta$  68.2 (d, <sup>2</sup>J<sub>P-P</sub> = 2 Hz, 1 P, P-Au), 50.8 (d, <sup>2</sup>J<sub>P-P</sub> = 2 Hz, 1 P, P-Au), -144.2 (h, <sup>1</sup>J<sub>P-F</sub> = 714 Hz, 1 P, PF<sub>6</sub>). ESI-MS (MeCN) **positive mode exact mass** for [C<sub>53</sub>H<sub>54</sub>SP<sub>2</sub>Au]<sup>+</sup> (981.3081): measured *m/z* 981.3078 [M-PF<sub>6</sub>]<sup>+</sup>. Calcd for C<sub>53</sub>H<sub>54</sub>P<sub>2</sub>SAuPF<sub>6</sub>·H<sub>2</sub>O (1136.0): C, 56.04; H, 4.88; S, 2.82. Found: C, 55.92; H 4.87; S, 3.07.

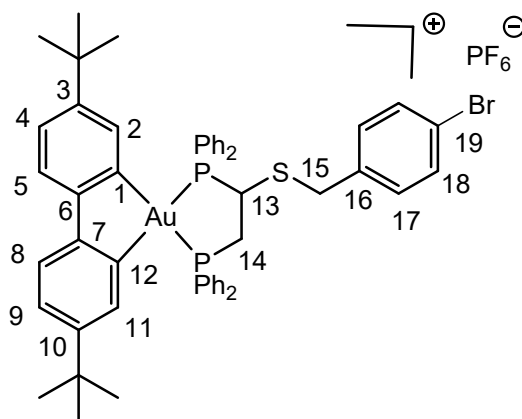

**2b: 4-bromobenzylmercaptan** (41 mg, 0.2 mmol), product (39 mg, 0.032 mmol, 81 % yield).  $^1\text{H}$  NMR ( $\text{CDCl}_3$ , 300 MHz, 300 K): 7.97 (m, 6 H,  $6x\text{H}_{\text{ortho-PPH}_2}$ ), 7.48-7.69 (m, 14 H,  $2x\text{H}_{\text{ortho-PPH}_2} + 8x\text{H}_{\text{meta-PPH}_2} + 4x\text{H}_{\text{para-PPH}_2}$ ), 7.38 (broad s, 2 H,  $\text{H}^5 + \text{H}^8$ ), 7.23 (broad s, 2 H,  $\text{H}^2 + \text{H}^{11}$ ), 7.10-7.15 (m, 4 H,  $\text{H}^4 + \text{H}^9 + \text{H}^{17}$ ), 6.58 (d,  $^3J_{\text{H-H}} = 7$  Hz, 2 H,  $\text{H}^{18}$ ), 4.29 (dm,  $^2J_{\text{P-H}} = 30$  Hz, 1 H,  $\text{H}^{13}$ ), 3.15-3.45 (m, 4 H,  $\text{H}^{14} + \text{H}^{15}$ ), 0.75 (s, 9 H,  $^t\text{Bu}$ ), 0.72 (s, 9 H,  $^t\text{Bu}$ ).  $^{13}\text{C}\{^1\text{H}\}$  Jmod NMR ( $\text{CDCl}_3$ , 75.5 MHz, 300 K):  $\delta$  163.5 (dd,  $^2J_{\text{P-C}} = 110$  Hz,  $^2J_{\text{P-C}} = 7$  Hz,  $\text{C}^{1/12}$ ), 163.0 (dd,  $^2J_{\text{P-C}} = 111$  Hz,  $^2J_{\text{P-C}} = 7$  Hz,  $\text{C}^{1/12}$ ), 151.9 (m,  $\text{C}^6 + \text{C}^7$ ), 151.0 (m,  $\text{C}^3 + \text{C}^{10}$ ), 136.2 (m,  $\text{C}^2 + \text{C}^{11}$ ), 135.8 (d,  $^2J_{\text{P-C}} = 11$  Hz,  $\text{C}_{\text{ortho-PPH}_2}$ ), 135.2 (d,  $^2J_{\text{P-C}} = 12$  Hz,  $\text{C}_{\text{ortho-PPH}_2}$ ), 134.4 (s,  $\text{C}^{16}$ ), 134.2-134.4 (d + shoulder,  $^2J_{\text{P-C}} = 11$  Hz,  $\text{C}_{\text{ortho-PPH}_2} + \text{C}_{\text{para-PPH}_2}$ ), 134.0 (d,  $^4J_{\text{P-C}} = 2$  Hz,  $\text{C}_{\text{para-PPH}_2}$ ), 133.7-133.9 (d + shoulder,  $^2J_{\text{P-C}} = 12$  Hz,  $\text{C}_{\text{ortho-PPH}_2} + \text{C}_{\text{para-PPH}_2}$ ), 133.4 (d,  $^4J_{\text{P-C}} = 2$  Hz,  $\text{C}_{\text{para-PPH}_2}$ ), 131.7 (s,  $\text{C}^{17}$ ), 130.9 (s,  $\text{C}^{18}$ ), 130.7 (d,  $J_{\text{P-C}} = 11$  Hz,  $\text{C}_{\text{meta-PPH}_2}$ ), 130.4 (d,  $J_{\text{P-C}} = 11$  Hz,  $\text{C}_{\text{meta-PPH}_2}$ ), 130.1 (d,  $J_{\text{P-C}} = 12$  Hz,  $\text{C}_{\text{meta-PPH}_2}$ ), 129.8 (d,  $J_{\text{P-C}} = 12$  Hz,  $\text{C}_{\text{meta-PPH}_2}$ ), 125.4 (s,  $\text{C}^4 + \text{C}^9$ ), 124.3 (d,  $^1J_{\text{P-C}} = 52$  Hz,  $\text{C}_{\text{ipso-PPH}_2}$ ), 123.5 (d,  $^1J_{\text{P-C}} = 52$  Hz,  $\text{C}_{\text{ipso-PPH}_2}$ ), 122.5 (d,  $^1J_{\text{P-C}} = 47$  Hz,  $\text{C}_{\text{ipso-PPH}_2}$ ), 121.9 (d,  $^1J_{\text{P-C}} = 53$  Hz,  $\text{C}_{\text{ipso-PPH}_2}$ ), 121.8 (d,  $^4J_{\text{P-C}} = 6$  Hz,  $\text{C}^5 + \text{C}^8$ ), 121.4 (s,  $\text{C}^{19}$ ), 45.6 (dd,  $^1J_{\text{P-C}} = 32$  Hz,  $^2J_{\text{P-C}} = 9$  Hz,  $\text{C}^{13}$ ), 37.3 (dd,  $^1J_{\text{P-C}} = 34$  Hz,  $^2J_{\text{P-C}} = 14$  Hz,  $\text{C}^{14}$ ), 37.2 (d,  $^3J_{\text{P-C}} = 3$  Hz,  $\text{C}^{15}$ ), 34.9 (s,  $\text{C}_{\text{quat-tBu}}$ ), 34.7 (s,  $\text{C}_{\text{quat-tBu}}$ ), 30.9 (s,  $\text{CH}_3\text{-tBu}$ ), 30.8 (s,  $\text{CH}_3\text{-tBu}$ ).  $^{31}\text{P}\{^1\text{H}\}$  NMR ( $\text{CDCl}_3$ , 121.5 MHz, 300 K):  $\delta$  68.1 (s, 1 P, P-Au), 50.5 (s, 1 P, P-Au), -144.2 (h,  $^1J_{\text{P-F}} = 718$  Hz, 1 P,  $\text{PF}_6$ ). ESI-MS (MeCN) **positive mode exact mass** for  $[\text{C}_{53}\text{H}_{53}\text{SBrP}_2\text{Au}]^+$  (1059.2187): measured  $m/z$  1059.2193  $[\text{M-PF}_6]^+$ . Calcd for  $\text{C}_{53}\text{H}_{53}\text{P}_2\text{SBrAuPF}_6$  (1205.8): C, 52.79; H, 4.43; S, 2.66. Found: C, 52.87; H 5.01; S, 2.54.

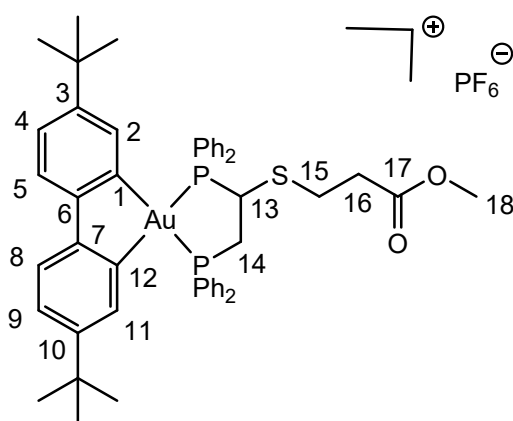

**2c: methyl 3-mercaptopropionate** (22  $\mu\text{L}$ , 24 mg, 0.2 mmol), product (42 mg, 0.038 mmol, 94 % yield).  $^1\text{H}$  NMR ( $\text{CDCl}_3$ , 300 MHz, 300 K):  $\delta$  8.24 (m, 2 H,  $2x\text{H}_{\text{ortho-PPH}_2}$ ), 8.03 (dd,  $^3J_{\text{P-H}} = 12.6$  Hz,  $^3J_{\text{H-H}} = 8$  Hz, 2 H,  $2x\text{H}_{\text{ortho-PPH}_2}$ ), 7.90 (dd,  $^3J_{\text{P-H}} = 12$  Hz,  $^3J_{\text{H-H}} = 7.9$  Hz, 2 H,  $2x\text{H}_{\text{ortho-PPH}_2}$ ), 7.61-7.72 (m, 8 H,  $2x\text{H}_{\text{meta-PPH}_2} + 4x\text{H}_{\text{para-PPH}_2}$ ), 7.32-7.53 (m, 9 H,  $\text{H}^5 + \text{H}^8 + \text{H}^{11} + 2x\text{H}_{\text{ortho-PPH}_2} + 4x\text{H}_{\text{meta-PPH}_2}$ ), 7.17 (d,  $^3J_{\text{H-H}} = 8$  Hz, 1 H,  $\text{H}^{4/9}$ ), 7.15 (d,  $^3J_{\text{H-H}} = 7.9$  Hz, 1 H,  $\text{H}^{4/9}$ ), 4.85 (dm,  $^2J_{\text{P-H}} = 38$  Hz, 1 H,  $\text{H}^{13}$ ), 3.55-3.81 (m, 1 H,  $\text{H}^{14}$ ), 3.51 (s, 3 H,

H<sup>18</sup>), 2.96 (m, 1 H, H<sup>14</sup>), 2.25 (m, 2 H, H<sup>16</sup>), 2.00-2.14 (m, 2 H, H<sup>15</sup>), 0.78 (s, 9 H, <sup>t</sup>Bu), 0.72 (s, 9 H, <sup>t</sup>Bu). <sup>13</sup>C{<sup>1</sup>H} Jmod NMR (CDCl<sub>3</sub>, 75.5 MHz, 300 K): δ 171.9 (s, C<sup>17</sup>), 163.3 (dd, <sup>2</sup>J<sub>P-C</sub> = 110 Hz, <sup>2</sup>J<sub>P-C</sub> = 8 Hz, C<sup>1/12</sup>), 163.0 (dd, <sup>2</sup>J<sub>P-C</sub> = 112 Hz, <sup>2</sup>J<sub>P-C</sub> = 7 Hz, C<sup>1/12</sup>), 152.1 (d, <sup>3</sup>J<sub>P-C</sub> = 3 Hz, C<sup>6/7</sup>), 151.9 (d, <sup>3</sup>J<sub>P-C</sub> = 3 Hz, C<sup>6/7</sup>), 151.0 (m, C<sup>3</sup> + C<sup>10</sup>), 136.7 (m, C<sup>2/11</sup>), 136.3 (m, C<sup>2/11</sup>), 135.9 (d, <sup>2</sup>J<sub>P-C</sub> = 13 Hz, C<sub>ortho-PPh<sub>2</sub></sub>), 135.5 (d, <sup>2</sup>J<sub>P-C</sub> = 10 Hz, C<sub>ortho-PPh<sub>2</sub></sub>), 134.9 (d, <sup>2</sup>J<sub>P-C</sub> = 12 Hz, C<sub>ortho-PPh<sub>2</sub></sub>), 134.3 (d, <sup>4</sup>J<sub>P-C</sub> = 2 Hz, C<sub>para-PPh<sub>2</sub></sub>), 133.8 (s, 2xC<sub>para-PPh<sub>2</sub></sub>), 133.0 (d+d, <sup>2</sup>J<sub>P-C</sub> = 12 Hz + <sup>4</sup>J<sub>P-C</sub> = 2 Hz, C<sub>ortho-PPh<sub>2</sub></sub> + C<sub>para-PPh<sub>2</sub></sub>), 130.9 (d, <sup>3</sup>J<sub>P-C</sub> = 11 Hz, C<sub>meta-PPh<sub>2</sub></sub>), 130.2 (d, <sup>3</sup>J<sub>P-C</sub> = 11 Hz, C<sub>meta-PPh<sub>2</sub></sub>), 130.0 (d, <sup>3</sup>J<sub>P-C</sub> = 12 Hz, C<sub>meta-PPh<sub>2</sub></sub>), 129.6 (d, <sup>3</sup>J<sub>P-C</sub> = 11 Hz, C<sub>meta-PPh<sub>2</sub></sub>), 125.5 (s, C<sup>4/9</sup>), 125.4 (s, C<sup>4/9</sup>), 125.3 (d, <sup>1</sup>J<sub>P-C</sub> = 52 Hz, C<sub>ipso-PPh<sub>2</sub></sub>), 123.2 (d, <sup>1</sup>J<sub>P-C</sub> = 52 Hz, C<sub>ipso-PPh<sub>2</sub></sub>), 123.0 (d, <sup>1</sup>J<sub>P-C</sub> = 51 Hz, C<sub>ipso-PPh<sub>2</sub></sub>), 122.5 (d, <sup>1</sup>J<sub>P-C</sub> = 49 Hz, C<sub>ipso-PPh<sub>2</sub></sub>), 121.8 (m, <sup>4</sup>J<sub>P-C</sub> = 7 Hz, C<sup>5</sup> + C<sup>8</sup>), 51.8 (s, C<sup>18</sup>), 46.4 (dd, <sup>1</sup>J<sub>P-C</sub> = 34 Hz, <sup>2</sup>J<sub>P-C</sub> = 8 Hz, C<sup>13</sup>), 38.0 (dd, <sup>1</sup>J<sub>P-C</sub> = 35 Hz, <sup>2</sup>J<sub>P-C</sub> = 14 Hz, C<sup>14</sup>), 34.9 (s, C<sub>quat.tBu</sub>), 34.6 (s, C<sub>quat.tBu</sub>), 33.9 (s, C<sup>16</sup>), 31.0 (s, CH<sub>3.tBu</sub>), 30.7 (s, CH<sub>3.tBu</sub>), 28.6 (d, <sup>3</sup>J<sub>P-C</sub> = 3 Hz, C<sup>15</sup>). <sup>31</sup>P{<sup>1</sup>H} NMR (CDCl<sub>3</sub>, 162.0 MHz, 300 K): δ 70.3 (d, <sup>2</sup>J<sub>P-P</sub> = 6 Hz, 1 P, P-Au), 54.2 (d, <sup>2</sup>J<sub>P-P</sub> = 6 Hz, 1 P, P-Au), -144.2 (h, <sup>1</sup>J<sub>P-F</sub> = 715 Hz, 1 P, PF<sub>6</sub>). ESI-MS (MeCN) **positive mode exact mass** for [C<sub>50</sub>H<sub>54</sub>SP<sub>2</sub>O<sub>2</sub>Au]<sup>+</sup> (977.2980): measured *m/z* 977.2972 [M-PF<sub>6</sub>]<sup>+</sup>. Calcd for C<sub>50</sub>H<sub>54</sub>P<sub>2</sub>SO<sub>2</sub>AuPF<sub>6</sub>·0.5H<sub>2</sub>O (1131.9): C, 53.06; H, 4.90; S, 2.83. Found: C, 52.91; H 4.94; S, 2.70.

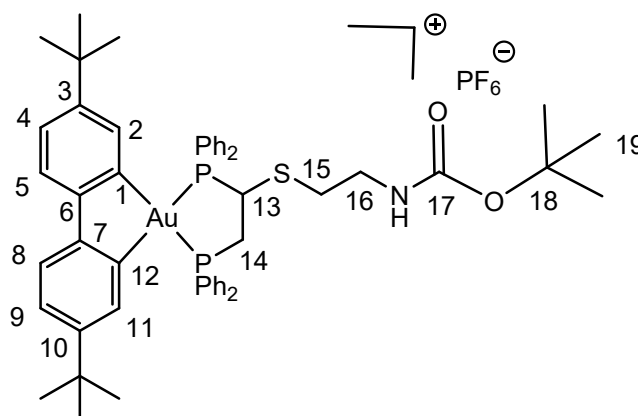

**2d: 2-N-Boc-cysteamine** (34 μL, 35 mg, 0.2 mmol), product: (30 mg, 0.025 mmol, 64 % yield). <sup>1</sup>H NMR (CDCl<sub>3</sub>, 300 MHz, 300 K): δ 8.29 (broad s, 2 H, 2xH<sub>ortho-PPh<sub>2</sub></sub>), 8.04 (m, 2 H, 2xH<sub>ortho-PPh<sub>2</sub></sub>), 7.88 (m, 2 H, 2xH<sub>ortho-PPh<sub>2</sub></sub>), 7.60-7.73 (m, 7 H, 4xH<sub>meta-PPh<sub>2</sub></sub> + 3xH<sub>para-PPh<sub>2</sub></sub>), 7.35-7.50 (m, 11 H, H<sup>2</sup> + H<sup>5</sup> + H<sup>8</sup> + H<sup>11</sup> + 2xH<sub>ortho-PPh<sub>2</sub></sub> + 4xH<sub>meta-PPh<sub>2</sub></sub> + H<sub>para-PPh<sub>2</sub></sub>), 4.81 (s+ broad d, <sup>2</sup>J<sub>P-H</sub> = 42 Hz, 2 H, NH + H<sup>13</sup>), 3.68 (dm, <sup>2</sup>J<sub>P-H</sub> = 42 Hz, 1 H, H<sup>14</sup>), 2.91 (broad s, 3 H, H<sup>14</sup> + H<sup>16</sup>), 2.03 (broad s, 1 H, H<sup>15</sup>), 1.70 (broad s, 1 H, H<sup>15</sup>), 1.35 (s, 9 H, H<sup>19</sup>), 0.77 (s, 9 H, <sup>t</sup>Bu), 0.71 (s, 9 H, <sup>t</sup>Bu). <sup>13</sup>C{<sup>1</sup>H} Jmod NMR (CDCl<sub>3</sub>, 75.5 MHz, 300 K): δ 163.3 (dd, <sup>2</sup>J<sub>P-C</sub> = 111 Hz, <sup>2</sup>J<sub>P-C</sub> = 7 Hz, C<sup>1/12</sup>), 163.0 (dd, <sup>2</sup>J<sub>P-C</sub> = 112 Hz, <sup>2</sup>J<sub>P-C</sub> = 7 Hz, C<sup>1/12</sup>), 156.1 (s, C<sup>17</sup>), 152.1 (d, <sup>3</sup>J<sub>P-C</sub> = 4 Hz, C<sup>6/7</sup>), 152.0 (d, <sup>3</sup>J<sub>P-C</sub> = 4 Hz, C<sup>6/7</sup>), 151.0 (m, C<sup>3</sup> + C<sup>10</sup>), 136.7 (m, C<sup>2/11</sup>), 136.3 (m, C<sup>2/11</sup>), 136.0 (d, <sup>2</sup>J<sub>P-C</sub> = 12 Hz, C<sub>ortho-PPh<sub>2</sub></sub>), 135.5 (d, <sup>2</sup>J<sub>P-C</sub> = 10 Hz, C<sub>ortho-PPh<sub>2</sub></sub>), 134.9 (d, <sup>2</sup>J<sub>P-C</sub> = 12 Hz, C<sub>ortho-PPh<sub>2</sub></sub>), 134.3 (d, <sup>4</sup>J<sub>P-C</sub> = 2 Hz, C<sub>para-PPh<sub>2</sub></sub>), 133.9 (d, <sup>4</sup>J<sub>P-C</sub> = 3 Hz, C<sub>para-PPh<sub>2</sub></sub>), 133.8 (d, <sup>4</sup>J<sub>P-C</sub> = 3 Hz, C<sub>para-PPh<sub>2</sub></sub>), 132.9 (m, C<sub>ortho-PPh<sub>2</sub></sub> + C<sub>para-PPh<sub>2</sub></sub>), 131.0 (d, <sup>3</sup>J<sub>P-C</sub> = 11 Hz, C<sub>meta-PPh<sub>2</sub></sub>), 130.1 (d, <sup>3</sup>J<sub>P-C</sub> = 11 Hz, C<sub>meta-PPh<sub>2</sub></sub>), 130.0 (d, <sup>3</sup>J<sub>P-C</sub> = 11 Hz, C<sub>meta-PPh<sub>2</sub></sub>), 129.5 (d, <sup>3</sup>J<sub>P-C</sub> = 12 Hz, C<sub>meta-PPh<sub>2</sub></sub>), 125.7 (d, <sup>1</sup>J<sub>P-C</sub> = 52 Hz, C<sub>ipso-PPh<sub>2</sub></sub>), 125.5 (s, C<sup>4/9</sup>), 125.4 (s, C<sup>4/9</sup>), 123.1 (d, <sup>1</sup>J<sub>P-C</sub> = 51 Hz, C<sub>ipso-PPh<sub>2</sub></sub>), 122.9 (d, <sup>1</sup>J<sub>P-C</sub> = 51 Hz, C<sub>ipso-PPh<sub>2</sub></sub>), 122.1 (d, <sup>1</sup>J<sub>P-C</sub> = 50 Hz, C<sub>ipso-PPh<sub>2</sub></sub>), 121.8 (m, C<sup>5</sup> + C<sup>8</sup>), 79.2 (s, C<sup>18</sup>), 45.6 (dd, <sup>1</sup>J<sub>P-C</sub> = 38 Hz, <sup>2</sup>J<sub>P-C</sub> = 7.7 Hz, C<sup>13</sup>), 39.7 (s, C<sup>16</sup>), 38.3 (dd, <sup>1</sup>J<sub>P-C</sub> = 36 Hz, <sup>2</sup>J<sub>P-C</sub> = 15 Hz, C<sup>14</sup>), 34.9 (s, C<sub>quat.tBu</sub>), 34.6 (s, C<sub>quat.tBu</sub>), 32.7 (s, C<sup>15</sup>), 31.0 (s, CH<sub>3.tBu</sub>), 30.7 (s, CH<sub>3.tBu</sub>), 28.5 (s, C<sup>19</sup>). <sup>31</sup>P{<sup>1</sup>H} NMR (CDCl<sub>3</sub>, 121.0 MHz, 300 K): δ 70.7 (d, <sup>2</sup>J<sub>P-P</sub> = 5 Hz, 1 P, P-Au), 54.7 (d, <sup>2</sup>J<sub>P-P</sub> = 5 Hz, 1 P, P-Au), -144.2 (h, <sup>1</sup>J<sub>F-P</sub> = 719 Hz, 1 P, PF<sub>6</sub>). ESI-MS (MeCN) **positive mode exact mass** for [C<sub>53</sub>H<sub>61</sub>SNP<sub>2</sub>O<sub>2</sub>Au]<sup>+</sup> (1034.3558):

measured  $m/z$  1034.3562  $[M-PF_6]^+$ . Calcd for  $C_{53}H_{61}P_2SNO_2AuPF_6$  (1180.0): C, 53.95; H, 5.21; N, 1.19; S, 2.72. Found: C, 54.23; H 6.24; N, 1.09; S, 2.72.

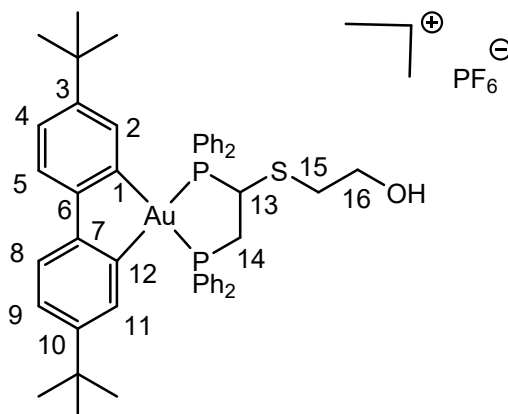

**2e: 2-mercaptoethanol** (22  $\mu$ L, 24 mg, **0.2 mmol**), product (35 mg, 0.032 mmol, 80 % yield).  $^1H$  NMR ( $CDCl_3$ , 400 MHz, 300 K):  $\delta$  8.22 (dd,  $^3J_{P-H} = 11$  Hz,  $^3J_{H-H} = 7$  Hz, 2 H,  $2xH_{ortho-PPh_2}$ ), 8.03 (dd,  $^3J_{P-H} = 12$  Hz,  $^3J_{H-H} = 7$  Hz, 2 H,  $2xH_{ortho-PPh_2}$ ), 7.93 (dd,  $^3J_{P-H} = 12$  Hz,  $^3J_{H-H} = 7$  Hz, 2 H,  $2xH_{ortho-PPh_2}$ ), 7.59-7.71 (m, 7 H,  $4xH_{meta-PPh_2} + 3xH_{para-PPh_2}$ ), 7.47-7.54 (m, 5 H,  $2xH_{ortho-PPh_2} + 2xH_{meta-PPh_2} + H_{para-PPh_2}$ ), 7.40-7.43 (m, 4 H,  $H^5 + H^8 + 2xH_{meta-PPh_2}$ ), 7.32 (d,  $^4J_{P-H} = 13$  Hz, 2 H,  $H^2 + H^{11}$ ), 7.16 (m, 2 H,  $H^4 + H^9$ ), 4.95 (dm,  $^2J_{P-H} = 36$  Hz, 1 H,  $H^{13}$ ), 3.59-3.74 (m, 1 H,  $H^{14}$ ), 3.52 (q,  $^3J_{H-H} = 5$  Hz,  $H^{16}$ ), 3.07 (m, 1 H,  $H^{14}$ ), 2.31 (t,  $^3J_{H-H} = 5$  Hz, 1 H, OH), 2.17 (m, 1 H,  $H^{15}$ ), 1.85 (m, 1 H,  $H^{15}$ ), 0.77 (s, 9 H,  $tBu$ ), 0.72 (s, 9 H,  $tBu$ ).  $^{13}C\{^1H\}$  Jmod NMR ( $CDCl_3$ , 75.5 MHz, 300 K):  $\delta$  163.4 (dd,  $^2J_{P-C} = 110$  Hz,  $^2J_{P-C} = 7$  Hz,  $C^{1/12}$ ), 163.1 (dd,  $^2J_{P-C} = 111$  Hz,  $^2J_{P-C} = 7$  Hz,  $C^{1/12}$ ), 152.1 (d,  $^3J_{P-C} = 3.8$  Hz,  $C^{6/7}$ ), 152.0 (d,  $^3J_{P-C} = 3$  Hz,  $C^{6/7}$ ), 151.0 (m,  $C^3 + C^{10}$ ), 136.5 (dd,  $^3J_{P-C} = 10$  Hz,  $^3J_{P-C} = 5$  Hz,  $C^{2/11}$ ), 136.3 (dd,  $^3J_{P-C} = 10$  Hz,  $^3J_{P-C} = 5$  Hz,  $C^{2/11}$ ), 135.7 (d,  $^2J_{P-C} = 13$  Hz,  $C_{ortho-PPh_2}$ ), 135.6 (d,  $^2J_{P-C} = 11$  Hz,  $C_{ortho-PPh_2}$ ), 134.8 (d,  $^2J_{P-C} = 11$  Hz,  $C_{ortho-PPh_2}$ ), 134.3 (d,  $^4J_{P-C} = 2$  Hz,  $C_{para-PPh_2}$ ), 133.9 (d,  $^4J_{P-C} = 3$  Hz,  $C_{para-PPh_2}$ ), 133.7 (d,  $^4J_{P-C} = 3$  Hz,  $C_{para-PPh_2}$ ), 133.3 (d,  $^2J_{P-C} = 12$  Hz,  $C_{ortho-PPh_2}$ ), 133.2 (d,  $^4J_{P-C} = 3$  Hz,  $C_{para-PPh_2}$ ), 130.8 (d,  $^3J_{P-C} = 11$  Hz,  $C_{meta-PPh_2}$ ), 130.2 (d,  $^3J_{P-C} = 12$  Hz,  $C_{meta-PPh_2}$ ), 130.0 (d,  $^3J_{P-C} = 12$  Hz,  $C_{meta-PPh_2}$ ), 129.5 (d,  $^3J_{P-C} = 12$  Hz,  $C_{meta-PPh_2}$ ), 125.4 (s,  $C^{5/8}$ ), 125.3 (s,  $C^{5/8}$ ), 124.8 (d,  $^1J_{P-C} = 52$  Hz,  $C_{ipso-PPh_2}$ ), 123.4 (d,  $^1J_{P-C} = 52$  Hz,  $C_{ipso-PPh_2}$ ), 122.8 (d,  $^1J_{P-C} = 52$  Hz,  $C_{ipso-PPh_2}$ ), 122.4 (d,  $^1J_{P-C} = 45$  Hz,  $C_{ipso-PPh_2}$ ), 121.8 (d,  $^4J_{P-C} = 3$  Hz,  $C^{4/9}$ ), 121.7 (d,  $^4J_{P-C} = 4$  Hz,  $C^{4/9}$ ), 62.7 (s,  $C^{16}$ ), 46.1 (dd,  $^1J_{P-C} = 33$  Hz,  $^2J_{P-C} = 8$  Hz,  $C^{13}$ ), 38.0 (dd,  $^1J_{P-C} = 36$  Hz,  $^2J_{P-C} = 16$  Hz,  $C^{14}$ ), 65.6 (d,  $^3J_{P-C} = 3$  Hz,  $C^{13}$ ), 34.9 (s,  $C_{quat.tBu}$ ), 34.6 (s,  $C_{quat.tBu}$ ), 30.9 (s,  $CH_{3.tBu}$ ), 30.7 (s,  $CH_{3.tBu}$ ).  $^{31}P\{^1H\}$  NMR ( $CDCl_3$ , 162.0 MHz, 300 K):  $\delta$  69.6 (d,  $^2J_{P-P} = 4$  Hz, 1 P, P-Au), 53.4 (d,  $^2J_{P-P} = 4$  Hz, 1 P, P-Au), -144.2 (h,  $^1J_{P-F} = 716$  Hz, 1 P,  $PF_6$ ). ESI-MS (MeCN) **positive mode exact mass** for  $[C_{48}H_{52}SP_2OAU]^+$  (935.2874): measured  $m/z$  935.2880  $[M-PF_6]^+$ . Calcd for  $C_{48}H_{52}P_2SOAU PF_6 \cdot 0.5H_2O$  (1089.9): C, 52.90; H, 4.90; S, 2.94. Found: C, 52.70; H 4.99; S, 2.95.

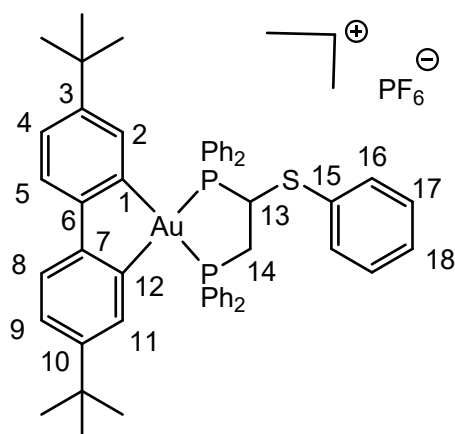

**2f: thiophenol** (20  $\mu\text{L}$ , 22 mg, **0.2 mmol**), product (43 mg, 0.039 mmol, 97 % yield).  $^1\text{H}$  NMR ( $\text{CDCl}_3$ , 300 MHz, 300 K):  $\delta$  8.25-830 (m, 2 H,  $2x\text{H}_{\text{ortho-PPH}_2}$ ), 7.85-7.92 (m, 4 H,  $4x\text{H}_{\text{ortho-PPH}_2}$ ), 7.75 (m, 3 H,  $2x\text{H}_{\text{meta-PPH}_2} + \text{H}_{\text{para-PPH}_2}$ ), 7.67 (t,  $^3J_{\text{H-H}} = 8$  Hz, 1 H,  $\text{H}_{\text{para-PPH}_2}$ ), 7.51-7.59 (m, 3 H,  $2x\text{H}_{\text{meta-PPH}_2} + \text{H}_{\text{para-PPH}_2}$ ), 7.40-7.48 (m, 5 H,  $\text{H}^5 + \text{H}^8 + 2x\text{H}_{\text{meta-PPH}_2} + \text{H}_{\text{para-PPH}_2}$ ), 5.28-5.34 (m, 6 H,  $\text{H}^2 + \text{H}^{11} + 2x\text{H}_{\text{ortho-PPH}_2} + 2x\text{H}_{\text{meta-PPH}_2}$ ), 7.19 (d,  $^3J_{\text{H-H}} = 8$  Hz, 1 H,  $\text{H}^{4/9}$ ), 7.17 (d,  $^3J_{\text{H-H}} = 8$  Hz, 1 H,  $\text{H}^{4/9}$ ), 7.06 (m, 3 H,  $\text{H}^{17} + \text{H}^{18}$ ), 6.77 (m, 2 H,  $\text{H}^{16}$ ), 5.21 (dm,  $^2J_{\text{P-H}} = 36.1$  Hz, 1 H,  $\text{H}^{13}$ ), 3.61 (dm,  $^2J_{\text{P-H}} = 38$  Hz, 1 H,  $\text{H}^{14}$ ), 2.99 (m, 1 H,  $\text{H}^{14}$ ), 0.78 (s, 9 H,  $^t\text{Bu}$ ), 0.72 (s, 9 H,  $^t\text{Bu}$ ).  $^{13}\text{C}\{^1\text{H}\}$  Jmod NMR ( $\text{CDCl}_3$ , 75.5 MHz, 300 K):  $\delta$  163.4 (dd,  $^2J_{\text{P-C}} = 111$  Hz,  $^2J_{\text{P-C}} = 7$  Hz,  $\text{C}^{1/12}$ ), 163.2 (dd,  $^3J_{\text{P-C}} = 112$  Hz,  $^2J_{\text{P-C}} = 7$  Hz,  $\text{C}^{1/12}$ ), 152.0 (m,  $\text{C}^6 + \text{C}^7$ ), 151.0 (m,  $\text{C}^3 + \text{C}^{10}$ ), 136.7 (m,  $\text{C}^{2/11}$ ), 136.2 (m,  $\text{C}^{2/11}$ ), 135.9 (d,  $^2J_{\text{P-C}} = 12$  Hz,  $\text{C}_{\text{ortho-PPH}_2}$ ), 135.4 (d,  $^2J_{\text{P-C}} = 11$  Hz,  $\text{C}_{\text{ortho-PPH}_2}$ ), 134.9 (d,  $^2J_{\text{P-C}} = 13$  Hz,  $\text{C}_{\text{ortho-PPH}_2}$ ), 134.5 (d,  $^4J_{\text{P-C}} = 3$  Hz,  $\text{C}_{\text{para-PPH}_2}$ ), 134.0 (d,  $^4J_{\text{P-C}} = 2$  Hz,  $\text{C}_{\text{para-PPH}_2}$ ), 133.6 (d,  $^4J_{\text{P-C}} = 2$  Hz,  $\text{C}_{\text{para-PPH}_2}$ ), 132.9 (m,  $\text{C}_{\text{para-PPH}_2} + \text{C}_{\text{ortho-PPH}_2}$ ), 131.1 (d,  $^3J_{\text{P-C}} = 11$  Hz,  $\text{C}_{\text{meta-PPH}_2}$ ), 130.7 (s,  $\text{C}^{16}$ ), 130.3 (s,  $\text{C}^{15}$ ), 130.2 (d,  $^3J_{\text{P-C}} = 12$  Hz,  $\text{C}_{\text{meta-PPH}_2}$ ), 130.0 (d,  $^3J_{\text{P-C}} = 11$  Hz,  $\text{C}_{\text{meta-PPH}_2}$ ), 129.7 (m,  $\text{C}_{\text{meta-PPH}_2} + \text{C}^{17}$ ), 128.0 (s,  $\text{C}^{18}$ ), 125.5 (s,  $\text{C}^{4/9}$ ), 125.4 (s,  $\text{C}^{4/9}$ ), 125.1 (d,  $^1J_{\text{P-C}} = 52$  Hz,  $\text{C}_{\text{ipso-PPH}_2}$ ), 123.3 (d,  $^1J_{\text{P-C}} = 52$  Hz,  $\text{C}_{\text{ipso-PPH}_2}$ ), 122.0 (d,  $^1J_{\text{P-C}} = 51$  Hz,  $\text{C}_{\text{ipso-PPH}_2}$ ), 121.9 (d,  $^4J_{\text{P-C}} = 4$  Hz,  $\text{C}^{5/8}$ ), 121.8 (d,  $^4J_{\text{P-C}} = 4$  Hz,  $\text{C}^{5/8}$ ), 121.5 (d,  $^1J_{\text{P-C}} = 48$  Hz,  $\text{C}_{\text{ipso-PPH}_2}$ ), 48.4 (dd,  $^1J_{\text{P-C}} = 33$  Hz,  $^2J_{\text{P-C}} = 10$  Hz,  $\text{C}^{13}$ ), 36.7 (dd,  $^1J_{\text{P-C}} = 36$  Hz,  $^2J_{\text{P-C}} = 14$  Hz,  $\text{C}^{14}$ ), 35.0 (s,  $\text{C}_{\text{quat-tBu}}$ ), 34.7 (s,  $\text{C}_{\text{quat-tBu}}$ ), 31.0 (s,  $\text{CH}_3\text{-tBu}$ ), 30.7 (s,  $\text{CH}_3\text{-tBu}$ ).  $^{31}\text{P}\{^1\text{H}\}$  NMR ( $\text{CDCl}_3$ , 121.5 MHz, 300 K):  $\delta$  68.6 (d,  $^2J_{\text{P-P}} = 4$  Hz, 1 P, P-Au), 52.8 (d,  $^2J_{\text{P-P}} = 4$  Hz, 1 P, P-Au), -144.2 (h,  $^1J_{\text{P-F}} = 716$  Hz, 1 P,  $\text{PF}_6^-$ ). ESI-MS (MeCN) **positive mode exact mass** for  $[\text{C}_{52}\text{H}_{52}\text{SP}_2\text{Au}]^+$  (967.2925): measured  $m/z$  967.2922  $[\text{M-PF}_6]^+$ . Calcd for  $\text{C}_{52}\text{H}_{52}\text{P}_2\text{SAuPF}_6$  (1112.9): C, 56.12; H, 4.71; S, 2.88. Found: C, 56.35; H 4.85; S, 2.95.

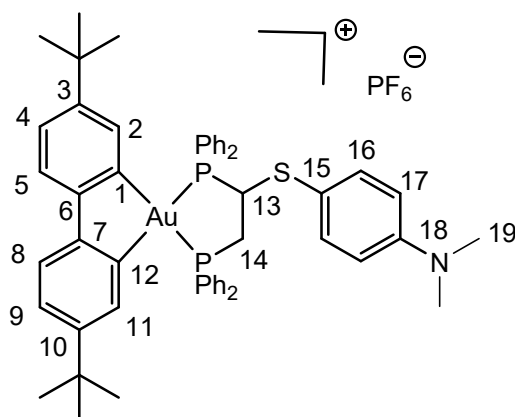

**2g: 4-N,N-dimethylaminothiophenol** (31 mg, **0.2 mmol**), product (31 mg, 0.026 mmol, 66 % yield).  $^1\text{H}$  NMR ( $\text{CDCl}_3$ , 300 MHz, 300 K):  $\delta$  8.14-8.20 (m, 2 H,  $2x\text{H}_{\text{ortho-PPH}_2}$ ), 7.87-7.98 (m, 4 H,  $4x\text{H}_{\text{ortho-PPH}_2}$ ), 7.63-7.70 (m, 5 H,  $2x\text{H}_{\text{meta-PPH}_2} + 3x\text{H}_{\text{para-PPH}_2}$ ), 7.46-7.60 (m, 5 H,  $4x\text{H}_{\text{meta-PPH}_2} + \text{H}_{\text{para-PPH}_2}$ ), 7.30-7.43 (m, 8 H,  $\text{H}^2$





MHz, 300 K):  $\delta$  67.9 (d,  $^2J_{P-P} = 3.9$  Hz, 1 P, P-Au), 53.1 (d,  $^2J_{P-P} = 3.9$  Hz, 1 P, P-Au), -144.2 (h,  $^1J_{P-F} = 709$  Hz, 1 P, PF<sub>6</sub>). ESI-MS (MeCN) *positive mode exact mass* for [C<sub>53</sub>H<sub>54</sub>SOP<sub>2</sub>Au]<sup>+</sup> (997.3031): measured *m/z* 997.3031 [M-PF<sub>6</sub>]<sup>+</sup>. Calcd for C<sub>53</sub>H<sub>54</sub>P<sub>2</sub>SOAuPF<sub>6</sub>·0.3C<sub>5</sub>H<sub>12</sub> (1167.0): C, 56.26; H, 5.01; S, 2.75. Found: C, 56.21; H 4.89; S, 3.01.

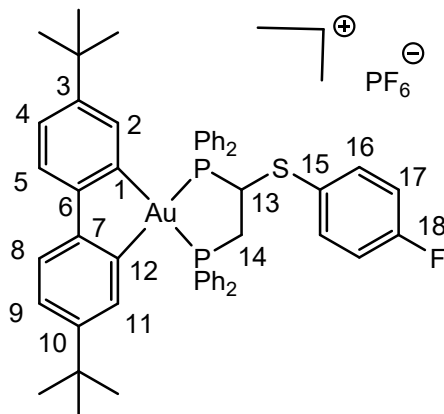

**2i: 4-fluorothiophenol** (21  $\mu$ L, 26 mg, 0.2 mmol), product (27 mg, 0.023 mmol, 59 % yield). <sup>1</sup>H NMR (CDCl<sub>3</sub>, 300 MHz, 300 K):  $\delta$  8.26 (m, 2 H, 2xH<sub>ortho-PPh2</sub>), 7.84-7.98 (m, 4 H, 4xH<sub>ortho-PPh2</sub>), 7.76 (m, 3 H, 2xH<sub>meta-PPh2</sub> + H<sub>para-PPh2</sub>), 7.69 (dd,  $^3J_{H-H} = 6.9$  Hz,  $^5J_{P-H} = 1.8$  Hz, 1 H, H<sub>para-PPh2</sub>), 7.55-7.61 (m, 3 H, 2xH<sub>meta-PPh2</sub> + H<sub>para-PPh2</sub>), 7.40-7.50 (m, 6 H, H<sup>2</sup> + H<sup>11</sup> + H<sup>5</sup> + H<sup>8</sup> + 2xH<sub>meta-PPh2</sub>), 7.28-7.36 (m, 5 H, 2xH<sub>ortho-PPh2</sub> + 2xH<sub>meta-PPh2</sub> + H<sub>para-PPh2</sub>), 7.19 (d,  $^3J_{H-H} = 8$  Hz, 1 H, H<sup>4/9</sup>), 7.17 (d,  $^3J_{H-H} = 8$  Hz, 1 H, H<sup>4/9</sup>), 6.77 (d,  $^3J_{F-H} = 4$  Hz, 2 H, H<sup>17</sup>), 6.75 (s, 2 H, H<sup>16</sup>), 5.28 (dm,  $^2J_{P-H} = 38$  Hz, 1 H, H<sup>13</sup>), 3.66 (dm,  $^2J_{P-H} = 40$  Hz, 1 H, H<sup>14</sup>), 2.96 (m, 1 H, H<sup>14</sup>), 0.79 (s, 9 H, <sup>t</sup>Bu), 0.73 (s, 9 H, <sup>t</sup>Bu). Jmod NMR (CDCl<sub>3</sub>, 75.5 MHz, 300 K):  $\delta$  164.0 (dd,  $^2J_{P-C} = 112$  Hz,  $^2J_{P-C} = 8$  Hz, C<sup>1/12</sup>), 162.8 (d,  $^1J_{F-C} = 249$  Hz, C<sup>18</sup>), 162.5 (dd,  $^2J_{P-C} = 112$  Hz,  $^2J_{P-C} = 7$  Hz, C<sup>1/12</sup>), 152.0 (m, C<sup>6</sup> + C<sup>7</sup>), 151.0 (m, C<sup>3</sup> + C<sup>10</sup>), 136.7 (dd,  $^3J_{P-C} = 10$  Hz,  $^3J_{P-C} = 6$  Hz, C<sup>2/11</sup>), 136.2 (d+m,  $^3J_{P-C} = 12$  Hz, C<sup>2/11</sup> + C<sub>ortho-PPh2</sub>), 135.3 (d,  $^3J_{P-C} = 11$  Hz C<sub>ortho-PPh2</sub>), 135.0 (d,  $^3J_{P-C} = 12$  Hz C<sub>ortho-PPh2</sub>), 134.5 (d,  $^4J_{P-C} = 3$  Hz C<sub>para-PPh2</sub>), 133.9 (d,  $^4J_{P-C} = 3$  Hz C<sub>para-PPh2</sub>), 133.7 (d,  $^4J_{P-C} = 3$  Hz C<sub>para-PPh2</sub>), 133.3 (d,  $^3J_{F-C} = 9$  Hz, C<sup>16</sup>), 132.9 (d,  $^4J_{P-C} = 3$  Hz C<sub>para-PPh2</sub>), 132.8 (d,  $^2J_{P-C} = 12$  Hz C<sub>ortho-PPh2</sub>), 131.0 (d,  $^3J_{P-C} = 11$  Hz C<sub>meta-PPh2</sub>), 130.0 (d,  $^3J_{P-C} = 11$  Hz C<sub>meta-PPh2</sub>), 129.9 (d,  $^3J_{P-C} = 12$  Hz C<sub>meta-PPh2</sub>), 129.6 (d,  $^3J_{P-C} = 12$  Hz C<sub>meta-PPh2</sub>), 125.6 (s, C<sup>4/9</sup>), 125.5 (s, C<sup>4/9</sup>), 125.3 (m, C<sup>15</sup>), 125.0 (d,  $^1J_{P-C} = 52$  Hz, C<sub>ipso-PPh2</sub>), 123.2 (d,  $^1J_{P-C} = 51$  Hz, C<sub>ipso-PPh2</sub>), 122.1 (d,  $^1J_{P-C} = 43$  Hz, C<sub>ipso-PPh2</sub>), 121.8 (m, C<sup>5</sup> + C<sup>8</sup>), 121.4 (d,  $^1J_{P-C} = 46$  Hz, C<sub>ipso-PPh2</sub>), 116.7 (d,  $^2J_{F-C} = 21$  Hz, C<sup>17</sup>), 49.1 (dd,  $^1J_{P-C} = 34$  Hz,  $^2J_{P-C} = 10$  Hz, C<sup>13</sup>), 36.7 (dd,  $^1J_{P-C} = 35$  Hz,  $^2J_{P-C} = 13$  Hz, C<sup>14</sup>), 34.9 (s, C<sub>quat.tBu</sub>), 34.6 (s, C<sub>quat.tBu</sub>), 30.9 (s, CH<sub>3.tBu</sub>), 30.6 (s, CH<sub>3.tBu</sub>). <sup>19</sup>F{<sup>1</sup>H} NMR (CDCl<sub>3</sub>, 282.4 MHz, 300 K):  $\delta$  -72.4 (d,  $^1J_{P-F} = 712$  Hz, 6 F, PF<sub>6</sub>), -112.4 (s,  $^7J_{P-F} = 4$  Hz, 1 F, F<sup>18</sup>). <sup>31</sup>P{<sup>1</sup>H} NMR (CDCl<sub>3</sub>, 121.5 MHz, 300 K):  $\delta$  69.5 (m, 1 P, P-Au), 54.1 (m, 1 P, P-Au), -144.1 (h,  $^1J_{P-F} = 712$  Hz, 1 P, PF<sub>6</sub>). ESI-MS (MeCN) *positive mode exact mass* for [C<sub>52</sub>H<sub>51</sub>SFP<sub>2</sub>Au]<sup>+</sup> (985.2831): measured *m/z* 985.2839 [M-PF<sub>6</sub>]<sup>+</sup>. Calcd for C<sub>52</sub>H<sub>51</sub>P<sub>2</sub>SFAuPF<sub>6</sub>·H<sub>2</sub>O (1148.9): C, 54.36; H, 4.65; S, 2.79. Found: C, 54.23; H 4.46; S, 2.89.

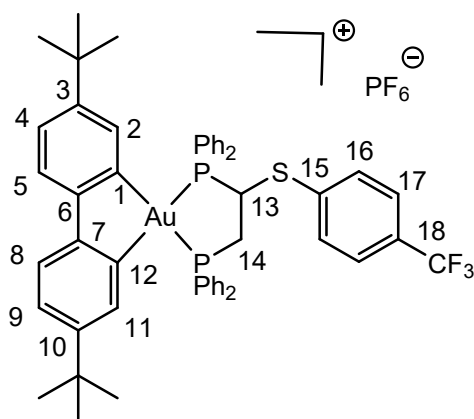

**2j: 4-trifluoromethylthiophenol** (27  $\mu\text{L}$ , 36 mg, **0.2 mmol**), product (32 mg, 0.027 mmol, 68 % yield).  $^1\text{H}$  NMR ( $\text{CDCl}_3$ , 300 MHz, 300 K):  $\delta$  8.38 (m, 2 H,  $2\times\text{H}_{\text{ortho-PPH}_2}$ ), 7.94 (dd,  $^3J_{\text{P-H}} = 12.3$  Hz,  $^3J_{\text{H-H}} = 8.6$  Hz, 2 H,  $2\times\text{H}_{\text{ortho-PPH}_2}$ ), 7.79 (m, 5 H,  $2\times\text{H}_{\text{ortho-PPH}_2} + 3\times\text{H}_{\text{para-PPH}_2}$ ), 7.67 (t,  $^3J_{\text{H-H}} = 7.8$  Hz, 1 H,  $\text{H}_{\text{para-PPH}_2}$ ), 7.51 (m, 4 H,  $2\times\text{H}_{\text{ortho-PPH}_2} + 2\times\text{H}_{\text{meta-PPH}_2}$ ), 7.36-7.44 (m, 8 H,  $\text{H}^5 + \text{H}^8 + 6\times\text{H}_{\text{meta-PPH}_2}$ ), 7.29 (m, 2 H,  $\text{H}^{16}$ ), 7.16-7.23 (m, 4 H,  $\text{H}^2 + \text{H}^4 + \text{H}^9 + \text{H}^{11}$ ), 6.93 (d,  $^3J_{\text{H-H}} = 8$  Hz,  $\text{H}^{17}$ ), 5.68 (dd,  $^2J_{\text{P-H}} = 41$  Hz,  $^3J_{\text{H-H}} = 10$  Hz, 1 H,  $\text{H}^{13}$ ), 3.81 (dm,  $^2J_{\text{P-H}} = 41$  Hz, 1 H,  $\text{H}^{14}$ ), 2.93 (m, 1 H,  $\text{H}^{14}$ ), 0.79 (s, 9 H,  $^t\text{Bu}$ ), 0.71 (s, 9 H,  $^t\text{Bu}$ ). Jmod NMR ( $\text{CDCl}_3$ , 75.5 MHz, 300 K):  $\delta$  163.3 (dd,  $^2J_{\text{P-C}} = 110$  Hz,  $^2J_{\text{P-C}} = 6.8$  Hz,  $\text{C}^{1/12}$ ), 162.9 (dd,  $^2J_{\text{P-C}} = 112$  Hz,  $^2J_{\text{P-C}} = 7$  Hz,  $\text{C}^{1/12}$ ), 151.9 (m,  $\text{C}^6 + \text{C}^7$ ), 151.1 (dd,  $^4J_{\text{P-C}} = 9$  Hz,  $^4J_{\text{P-C}} = 2.8$  Hz,  $\text{C}^{3/10}$ ), 150.8 (dd,  $^4J_{\text{P-C}} = 9$  Hz,  $^4J_{\text{P-C}} = 3$  Hz,  $\text{C}^{3/10}$ ), 136.9 (dd,  $^3J_{\text{P-C}} = 10$  Hz,  $^4J_{\text{P-C}} = 6$  Hz,  $\text{C}^{2/11}$ ), 136.1 (m,  $\text{C}^{2/11} + \text{C}_{\text{ortho-PPH}_2}$ ), 135.1 (d,  $^2J_{\text{P-C}} = 11$  Hz,  $\text{C}_{\text{ortho-PPH}_2}$ ), 135.0 (d,  $^2J_{\text{P-C}} = 12$  Hz,  $\text{C}_{\text{ortho-PPH}_2}$ ), 134.6 (d,  $^4J_{\text{P-C}} = 3$  Hz,  $\text{C}_{\text{para-PPH}_2}$ ), 133.8 (d,  $^4J_{\text{P-C}} = 3$  Hz,  $\text{C}_{\text{para-PPH}_2}$ ), 133.6 (d,  $^4J_{\text{P-C}} = 3$  Hz,  $\text{C}_{\text{para-PPH}_2}$ ), 132.7 (d,  $^4J_{\text{P-C}} = 3$  Hz,  $\text{C}_{\text{para-PPH}_2}$ ), 132.4 (d,  $^2J_{\text{P-C}} = 11$  Hz,  $\text{C}_{\text{ortho-PPH}_2}$ ), 131.2 (d,  $^3J_{\text{P-C}} = 11$  Hz,  $\text{C}_{\text{meta-PPH}_2}$ ), 129.9 (d,  $^3J_{\text{P-C}} = 11$  Hz,  $\text{C}_{\text{meta-PPH}_2}$ ), 129.7 (d,  $^3J_{\text{P-C}} = 10$  Hz,  $\text{C}_{\text{meta-PPH}_2}$ ), 129.6 (s,  $\text{C}^{16}$ ), 129.5 (d,  $^3J_{\text{P-C}} = 12$  Hz,  $\text{C}_{\text{meta-PPH}_2}$ ), 128.9 (s,  $\text{C}^{15}$ ), 126.1 (m,  $\text{C}^{17}$ ), 125.5 (s,  $\text{C}^{4/9}$ ), 125.4 (s,  $\text{C}^{4/9}$ ), 123.9 (q,  $^1J_{\text{F-C}} = 215$  Hz,  $\text{CF}_3$ ), 122.9 (d,  $^1J_{\text{P-C}} = 52$  Hz,  $\text{C}_{\text{ipso-PPH}_2}$ ), 121.8 (m,  $\text{C}^5 + \text{C}^8$ ), 120.8 (d,  $^1J_{\text{P-C}} = 45$  Hz,  $\text{C}_{\text{ipso-PPH}_2}$ ), 47.0 (dd,  $^1J_{\text{P-C}} = 33$  Hz,  $^2J_{\text{P-C}} = 8$  Hz,  $\text{C}^{13}$ ), 36.3 (dd,  $^1J_{\text{P-C}} = 36$  Hz,  $^2J_{\text{P-C}} = 12$  Hz,  $\text{C}^{14}$ ), 34.9 (s,  $\text{C}_{\text{quat.tBu}}$ ), 34.5 (s,  $\text{C}_{\text{quat.tBu}}$ ), 30.9 (s,  $\text{CH}_{3.\text{tBu}}$ ), 30.6 (s,  $\text{CH}_{3.\text{tBu}}$ ),  $\text{C}^{18}$  not visible.  $^{19}\text{F}\{^1\text{H}\}$  NMR ( $\text{CDCl}_3$ , 282.4 MHz, 300 K):  $\delta$  -62.8 (s, 3 F,  $\text{CF}_3$ ), -72.5 (d,  $^1J_{\text{P-F}} = 713$  Hz, 6 F,  $\text{PF}_6$ ).  $^{31}\text{P}\{^1\text{H}\}$  NMR ( $\text{CDCl}_3$ , 121.5 MHz, 300 K):  $\delta$  70.8 (d,  $^2J_{\text{P-P}} = 5$  Hz, 1 P, P-Au), 54.0 (d,  $^2J_{\text{P-P}} = 5$  Hz, 1 P, P-Au), -144.1 (h,  $^1J_{\text{P-F}} = 713$  Hz, 1 P,  $\text{PF}_6$ ). ESI-MS (MeCN) **positive mode exact mass** for  $[\text{C}_{53}\text{H}_{51}\text{SF}_3\text{P}_2\text{Au}]^+$  (1035.2799): measured  $m/z$  1035.2790 [M- $\text{PF}_6$ ] $^+$ . Calcd for  $\text{C}_{53}\text{H}_{51}\text{P}_2\text{SF}_3\text{AuPF}_6$  (1180.9): C, 53.91; H, 4.35; S, 2.71. Found: C, 54.29; H 4.53; S, 2.85.

### Synthesis of complex 3

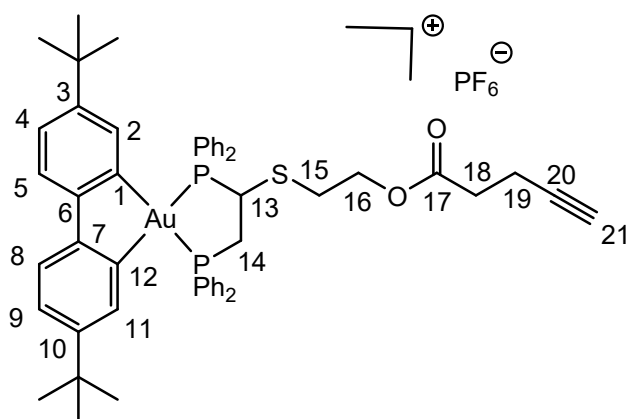

In a sealed tube is added **2e** (60 mg, 0.056 mmol), **pentynoic acid** (8 mg, 0.083 mmol), **N-Me-2-chloropyridinium iodide** (21 mg, 0.083 mmol), **N,N-dimethylaminopyridine** (10 mg, 0.083 mmol) dissolved into dry dichloromethane (5 mL). The reaction mixture is heated at 60 °C for 24 h. After cooling down to room temperature, the crude material is purified by column chromatography with silica gel and pure dichloromethane as eluent ( $R_f = 0.1$ ). The pure product is obtained as a beige powder after evaporation and drying from a dichloromethane/petroleum ether solution (34 mg, 0.029 mmol, 52 % yield).  $^1\text{H NMR}$  ( $\text{CDCl}_3$ , 300 MHz, 300 K):  $\delta$  8.28 (m, 2 H,  $2x\text{H}_{\text{ortho-PPH}_2}$ ), 8.06 (dd,  $^3J_{\text{P-H}} = 13$  Hz,  $^3J_{\text{H-H}} = 7$  Hz, 2 H,  $2x\text{H}_{\text{ortho-PPH}_2}$ ), 7.89 (dd,  $^3J_{\text{P-H}} = 12$  Hz,  $^3J_{\text{H-H}} = 8$  Hz, 2 H,  $2x\text{H}_{\text{ortho-PPH}_2}$ ), 7.74 (m, 4 H,  $2x\text{H}_{\text{meta-PPH}_2} + 2x\text{H}_{\text{para-PPH}_2}$ ), 7.63 (m, 2 H,  $2x\text{H}_{\text{meta-PPH}_2}$ ), 7.39-7.53 (m, 10 H,  $\text{H}^5 + \text{H}^8 + 2x\text{H}_{\text{ortho-PPH}_2} + 4x\text{H}_{\text{meta-PPH}_2} + 2x\text{H}_{\text{para-PPH}_2}$ ), 7.33 (d,  $^4J_{\text{P-H}} = 11$  Hz, 2 H,  $\text{H}^{11}$ ), 7.17 (m, 2 H,  $\text{H}^4 + \text{H}^9$ ), 4.86 (dm,  $^2J_{\text{P-H}} = 40$  Hz,  $\text{H}^{13}$ ), 3.63-3.92 (m, 3 H,  $\text{H}^{14} + \text{H}^{16}$ ), 2.95 (m, 1 H,  $\text{H}^{14}$ ), 2.29 (s, 4 H,  $\text{H}^{18} + \text{H}^{19}$ ), 2.14 (m, 2 H,  $\text{H}^{15}$ ), 1.94 (s, 1 H,  $\text{H}^{21}$ ), 0.78 (s, 9 H,  $^t\text{Bu}$ ), 0.71 (s, 9 H,  $^t\text{Bu}$ ).  $J_{\text{mod NMR}}$  ( $\text{CDCl}_3$ , 75.5 MHz, 300 K):  $\delta$  171.2 (s,  $\text{C}^{17}$ ), 163.4 (dd,  $^2J_{\text{P-C}} = 111$  Hz,  $^2J_{\text{P-C}} = 8$  Hz,  $\text{C}^{1/12}$ ), 163.0 (dd,  $^2J_{\text{P-C}} = 113$  Hz,  $^2J_{\text{P-C}} = 7$  Hz,  $\text{C}^{1/12}$ ), 152.1 (m,  $\text{C}^6 + \text{C}^7$ ), 151.1 (m,  $\text{C}^3 + \text{C}^{10}$ ), 136.7 (m,  $\text{C}^{2/11}$ ), 136.3 (m,  $\text{C}^{2/11}$ ), 136.0 (d,  $^2J_{\text{P-C}} = 13$  Hz,  $\text{C}_{\text{ortho-PPH}_2}$ ), 135.5 (d,  $^2J_{\text{P-C}} = 11$  Hz,  $\text{C}_{\text{ortho-PPH}_2}$ ), 135.0 (d,  $^2J_{\text{P-C}} = 12$  Hz,  $\text{C}_{\text{ortho-PPH}_2}$ ), 134.4 (d,  $^4J_{\text{P-C}} = 2$  Hz,  $\text{C}_{\text{para-PPH}_2}$ ), 133.9 (s,  $2x\text{C}_{\text{para-PPH}_2}$ ), 133.0 (d+d,  $^2J_{\text{P-C}} = 11$  Hz,  $^4J_{\text{P-C}} = 2$  Hz,  $\text{C}_{\text{ortho-PPH}_2} + \text{C}_{\text{para-PPH}_2}$ ), 131.0 (d,  $^3J_{\text{P-C}} = 11$  Hz,  $\text{C}_{\text{meta-PPH}_2}$ ), 130.2 (d,  $^3J_{\text{P-C}} = 11$  Hz,  $\text{C}_{\text{meta-PPH}_2}$ ), 130.0 (d,  $^3J_{\text{P-C}} = 12$  Hz,  $\text{C}_{\text{meta-PPH}_2}$ ), 129.6 (d,  $^3J_{\text{P-C}} = 12$  Hz,  $\text{C}_{\text{meta-PPH}_2}$ ), 125.5 (s,  $\text{C}^{4/9}$ ), 125.4 (s,  $\text{C}^{4/9}$ ), 125.3 (d,  $^1J_{\text{P-C}} = 53$  Hz,  $\text{C}_{\text{ipso-PPH}_2}$ ), 123.3 (d,  $^1J_{\text{P-C}} = 51$  Hz,  $\text{C}_{\text{ipso-PPH}_2}$ ), 122.9 (d,  $^1J_{\text{P-C}} = 50$  Hz,  $\text{C}_{\text{ipso-PPH}_2}$ ), 121.9 (d,  $^1J_{\text{P-C}} = 45$  Hz,  $\text{C}_{\text{ipso-PPH}_2}$ ), 121.8 (m,  $\text{C}^5 + \text{C}^8$ ), 82.6 (s,  $\text{C}^{20}$ ), 69.2 (s,  $\text{C}^{21}$ ), 61.9 (s,  $\text{C}^{16}$ ), 45.9 (dd,  $^1J_{\text{P-C}} = 34$  Hz,  $^2J_{\text{P-C}} = 9$  Hz,  $\text{C}^{13}$ ), 37.7 (dd,  $^1J_{\text{P-C}} = 35$  Hz,  $^2J_{\text{P-C}} = 14$  Hz,  $\text{C}^{14}$ ), 34.9 (s,  $\text{C}_{\text{quat-tBu}}$ ), 34.6 (s,  $\text{C}_{\text{quat-tBu}}$ ), 33.1 (s,  $\text{C}^{18}$ ), 32.2 (d,  $^3J_{\text{P-C}} = 2$  Hz,  $\text{C}^{15}$ ), 31.0 (s,  $\text{CH}_{3,\text{tBu}}$ ), 30.7 (s,  $\text{CH}_{3,\text{tBu}}$ ), 14.3 (s,  $\text{C}^{19}$ ).  $^{31}\text{P}\{^1\text{H}\}$  NMR ( $\text{CDCl}_3$ , 121.5 MHz, 300 K):  $\delta$  70.6 (d,  $^2J_{\text{P-P}} = 6$  Hz, 1 P, P-Au), 54.4 (d,  $^2J_{\text{P-P}} = 6$  Hz, 1 P, P-Au), -144.2 (h,  $^1J_{\text{P-F}} = 712$  Hz, 1 P,  $\text{PF}_6$ ). ESI-MS (MeCN) *positive mode exact mass* for  $[\text{C}_{53}\text{H}_{56}\text{P}_2\text{SO}_2\text{Au}]^+$  (1015.3136): measured  $m/z$  1015.3130  $[\text{M-PF}_6]^+$ . Calcd for  $\text{C}_{53}\text{H}_{56}\text{P}_2\text{SO}_2\text{AuPF}_6 \cdot \text{H}_2\text{O}$  (1179.0): C, 53.99; H, 4.96; S, 2.72. Found: C, 53.96; H 4.96; S, 2.74. FT-IR (ATR): 3287 (-C≡C-H), 2349 (-C≡C-), 1738 (C=O).

### X-Ray crystal structure determination

Single crystals of **1**, **2a**, **2e** and **2f** were selected, mounted onto a cryoloop and transferred into a cold nitrogen gas stream. Intensity data were collected with a Bruker Kappa-APEX2 CCD diffractometer using a graphite-monochromated MoK $\alpha$  radiation (**1** and **2e**) or a micro-focused CuK $\alpha$  radiation (**2a** and **2f**). Data collections, unit-cell parameters determinations, integration and data reductions were performed with the Bruker APEX/SAINT<sup>2</sup> suite at 200K. The structures were solved with SHELXT<sup>3</sup> or SHELXS<sup>4</sup> by direct method (for **2a**) and refined anisotropically by full-matrix least-squares methods with SHELXL<sup>5</sup>, using Olex2<sup>6</sup> software. All non-hydrogen atoms are refined anisotropically and H atoms are located geometrically.

The structures were deposited at the Cambridge Crystallographic Data Centre with numbers CCDC 2340607 - 2340610 and can be obtained free of charge via [www.ccdc.cam.ac.uk](http://www.ccdc.cam.ac.uk).

### Computational work

DFT calculations were performed using the Gaussian 16 software.<sup>7</sup> Geometry optimization, frequency and energy calculations were obtained using the hybrid PBE0 functional<sup>8,9</sup> coupled to the triple- $\zeta$  Ahlrichs type basis set def2-TZVP.<sup>10</sup> The effect of solvation (in chloroform) was modeled using the Polarizable Continuum Model (PCM) model.<sup>11</sup> Vibrational analysis served to locate minima (no imaginary frequency) or transition structures (one imaginary frequency).

**Table S1.** Crystallographic and refinement data for **1**, **2a**, **2e** and **2f**.

|                                                  | <b>1</b>                                                                                      | <b>2a (85%) + 1 (15%)</b>                                                                                                                                    | <b>2e (75%) + 1 (25%)</b>                                                                                                             | <b>2f</b>                                                                                                                                |
|--------------------------------------------------|-----------------------------------------------------------------------------------------------|--------------------------------------------------------------------------------------------------------------------------------------------------------------|---------------------------------------------------------------------------------------------------------------------------------------|------------------------------------------------------------------------------------------------------------------------------------------|
| <b>CCDC deposit number</b>                       | 2340607                                                                                       | 2340608                                                                                                                                                      | 2340609                                                                                                                               | 2340610                                                                                                                                  |
| <b>Empirical formula<sup>a</sup></b>             | C <sub>46</sub> H <sub>46</sub> AuF <sub>6</sub> P <sub>3</sub>                               | C <sub>52.45</sub> H <sub>53.8</sub> AuClF <sub>6</sub> P <sub>3</sub> S <sub>0.85</sub>                                                                     | C <sub>47.5</sub> H <sub>50.5</sub> AuF <sub>6</sub> O <sub>0.75</sub> P <sub>3</sub> S <sub>0.75</sub>                               | C <sub>54.25</sub> H <sub>56.5</sub> AuCl <sub>4.5</sub> F <sub>6</sub> P <sub>3</sub> S                                                 |
| <b>Moiety Formula</b>                            | C <sub>46</sub> H <sub>46</sub> AuP <sub>2</sub> <sup>+</sup> , F <sub>6</sub> P <sup>-</sup> | C <sub>51.95</sub> H <sub>52.8</sub> AuP <sub>2</sub> S <sub>0.85</sub> <sup>+</sup> , F <sub>6</sub> P <sup>-</sup> , 0.5(CH <sub>2</sub> Cl <sub>2</sub> ) | C <sub>47.5</sub> H <sub>50.5</sub> AuO <sub>0.75</sub> P <sub>2</sub> S <sub>0.75</sub> <sup>+</sup> , F <sub>6</sub> P <sup>-</sup> | C <sub>52</sub> H <sub>52</sub> AuP <sub>2</sub> S <sup>+</sup> , F <sub>6</sub> P <sup>-</sup> , 2.25(CH <sub>2</sub> Cl <sub>2</sub> ) |
| <b>Formula weight (g/mol)</b>                    | 1002.70                                                                                       | 1150.73                                                                                                                                                      | 1061.30                                                                                                                               | 1303.95                                                                                                                                  |
| <b>Temperature (K)</b>                           | 200                                                                                           | 200                                                                                                                                                          | 200                                                                                                                                   | 200                                                                                                                                      |
| <b>Crystal system</b>                            | Triclinic                                                                                     | Orthorhombic                                                                                                                                                 | Triclinic                                                                                                                             | Monoclinic                                                                                                                               |
| <b>Space group</b>                               | P-1                                                                                           | Pna2 <sub>1</sub>                                                                                                                                            | P-1                                                                                                                                   | C2/c                                                                                                                                     |
| <b>a (Å)</b>                                     | 9.167(3)                                                                                      | 20.5099(7)                                                                                                                                                   | 9.9276(9)                                                                                                                             | 42.5037(14)                                                                                                                              |
| <b>b (Å)</b>                                     | 13.791(5)                                                                                     | 18.1939(7)                                                                                                                                                   | 10.8859(10)                                                                                                                           | 10.6374(3)                                                                                                                               |
| <b>c (Å)</b>                                     | 18.034(6)                                                                                     | 14.1942(6)                                                                                                                                                   | 22.748(2)                                                                                                                             | 30.6654(10)                                                                                                                              |
| <b>α (°)</b>                                     | 107.196(6)                                                                                    | 90                                                                                                                                                           | 100.7210(10)                                                                                                                          | 90                                                                                                                                       |
| <b>β (°)</b>                                     | 103.478(6)                                                                                    | 90                                                                                                                                                           | 92.650(2)                                                                                                                             | 124.544(2)                                                                                                                               |
| <b>γ (°)</b>                                     | 94.662(7)                                                                                     | 90                                                                                                                                                           | 91.870(2)                                                                                                                             | 90                                                                                                                                       |
| <b>Volume (Å<sup>3</sup>)</b>                    | 2090.1(13)                                                                                    | 5296.6(4)                                                                                                                                                    | 2410.7(4)                                                                                                                             | 11420.2(7)                                                                                                                               |
| <b>Z</b>                                         | 2                                                                                             | 4                                                                                                                                                            | 2                                                                                                                                     | 8                                                                                                                                        |
| <b>ρ<sub>calc</sub> (g/cm<sup>3</sup>)</b>       | 1.593                                                                                         | 1.443                                                                                                                                                        | 1.462                                                                                                                                 | 1.517                                                                                                                                    |
| <b>Final R indexes<sup>b c</sup> [all data]</b>  | R1 = 0.0710, wR2 = 0.0726                                                                     | R1 = 0.0367, wR2 = 0.0939                                                                                                                                    | R1 = 0.0936, wR2 = 0.1727                                                                                                             | R1 = 0.0731, wR2 = 0.1560                                                                                                                |
| <b>Final R indexes<sup>b c</sup> [I ≥ 2σ(I)]</b> | R1 = 0.0493, wR2 = 0.0664                                                                     | R1 = 0.0345, wR2 = 0.0925                                                                                                                                    | R1 = 0.0699, wR2 = 0.1643                                                                                                             | R1 = 0.0628, wR2 = 0.1495                                                                                                                |

<sup>a</sup> Including solvent molecules (if presence)

$${}^b R1 = \frac{\sum ||F_o| - |F_c||}{\sum |F_o|} \quad {}^c wR2 = \sqrt{\frac{\sum (w(F_o^2 - F_c^2))}{\sum (w(F_o^2)^2)}}$$

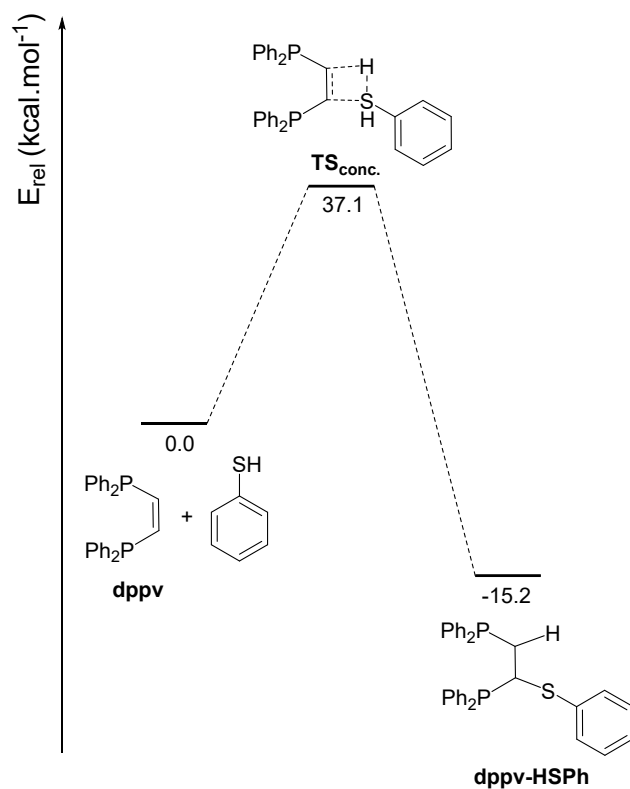

**Figure S1.** Potential energy diagram of the reaction of dppv with PhSH. Relative electronic energies are in kcal/mol and given relatively to the reactants.

**Table S2.** Calculated electronic and zero-point energies (in hartrees, H) of all compounds studied in this work.

|                           | Electronic energy | Zero-point energy |
|---------------------------|-------------------|-------------------|
| <b>1</b>                  | -2597.168907      | 0.790978          |
| <b><sup>-</sup>S-Ph</b>   | -629.6307799      | 0.0906984         |
| <b>HS-Ph</b>              | -630.116209       | 0.100243          |
| <b>1-SPh</b>              | -3226.819         | 0.881863          |
| <b>2f</b>                 | -3856.969474      | 0.9879373         |
| <b>dppv</b>               | -1685.607522      | 0.401487          |
| <b>dppv-HSPh</b>          | -2315.7539        | 0.507628          |
| <b>TS1</b>                | -3226.813097      | 0.881143          |
| <b>TS2</b>                | -3856.933371      | 0.9824737         |
| <b>TS<sub>conc.</sub></b> | -2315.664697      | 0.5018514         |

# NMR spectra

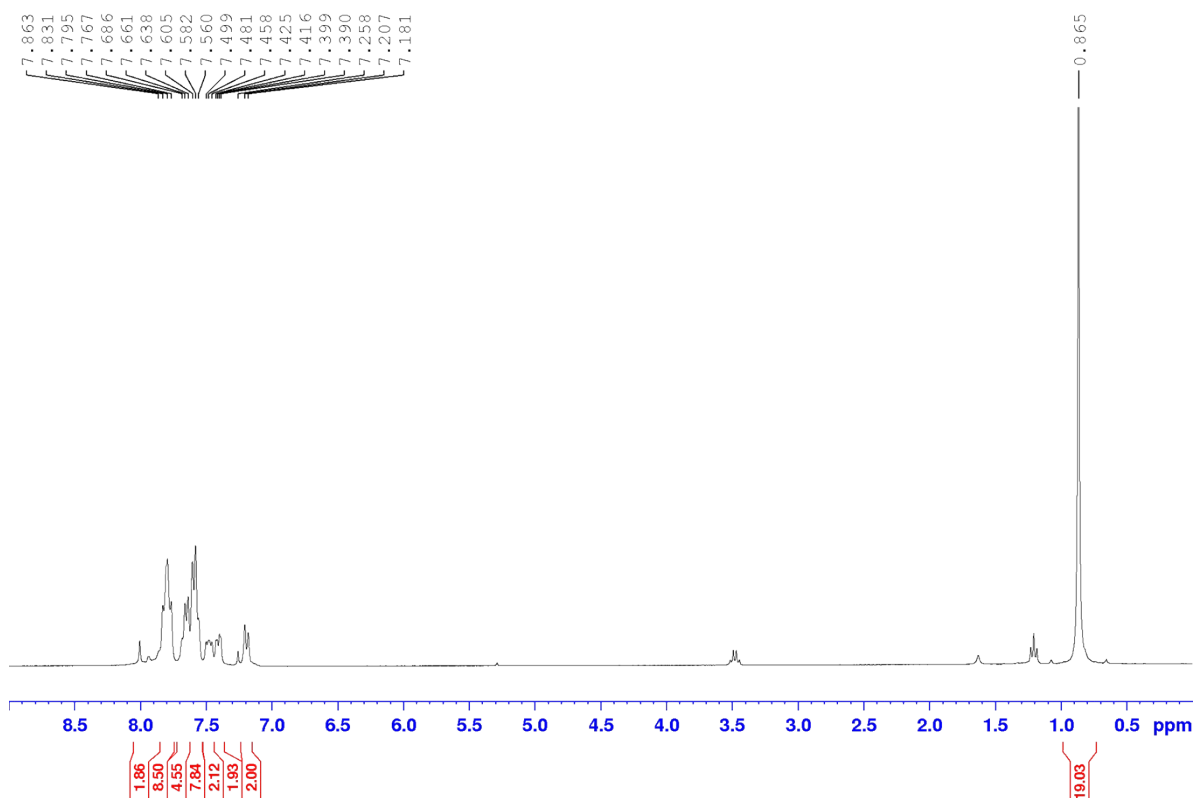

## <sup>13</sup>C{<sup>1</sup>H} Jmod NMR spectrum of complex 1 in CDCl<sub>3</sub>

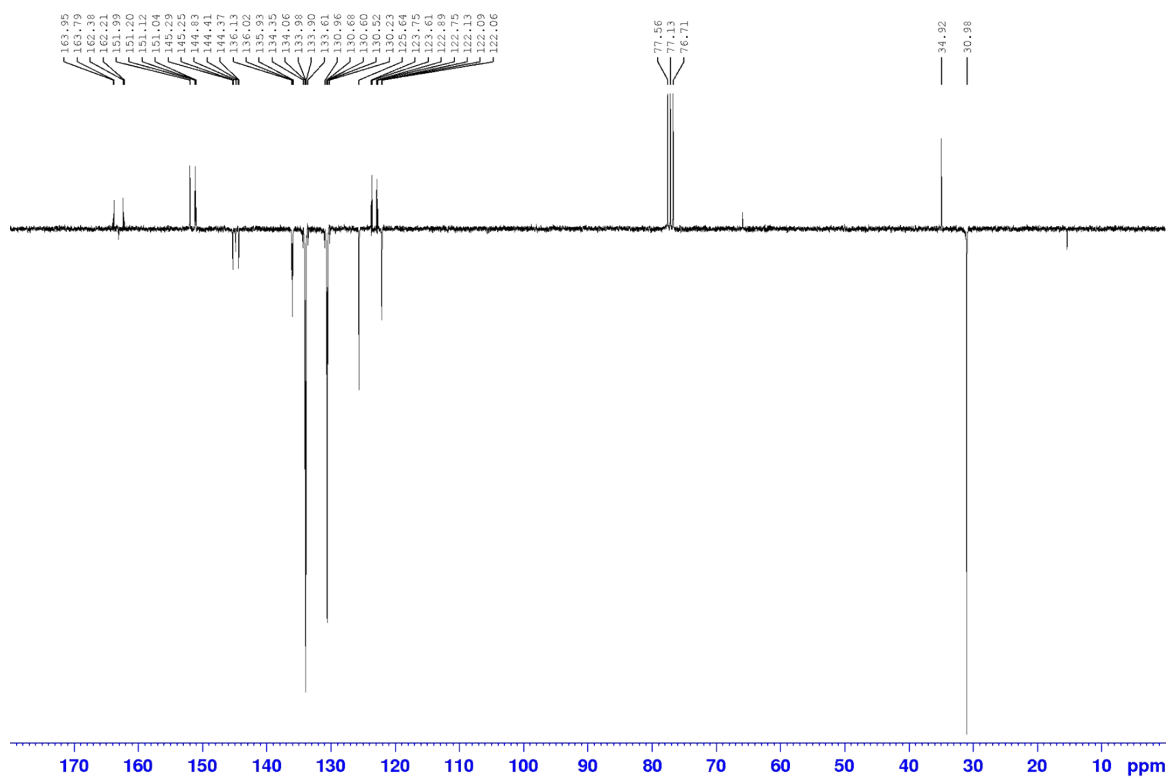

## <sup>13</sup>C{<sup>1</sup>H} Jmod NMR spectrum of complex 1 in CDCl<sub>3</sub>

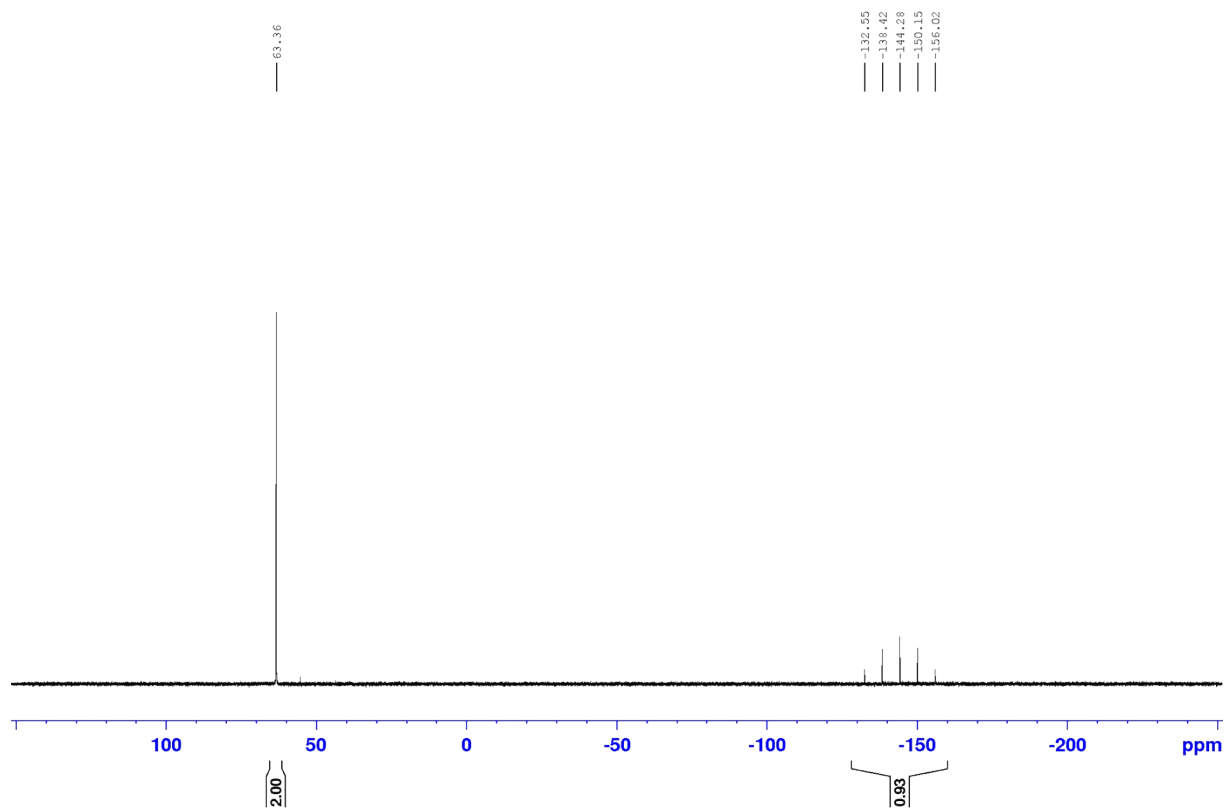

$^{31}\text{P}\{^1\text{H}\}$  NMR spectrum of complex **1** in  $\text{CDCl}_3$

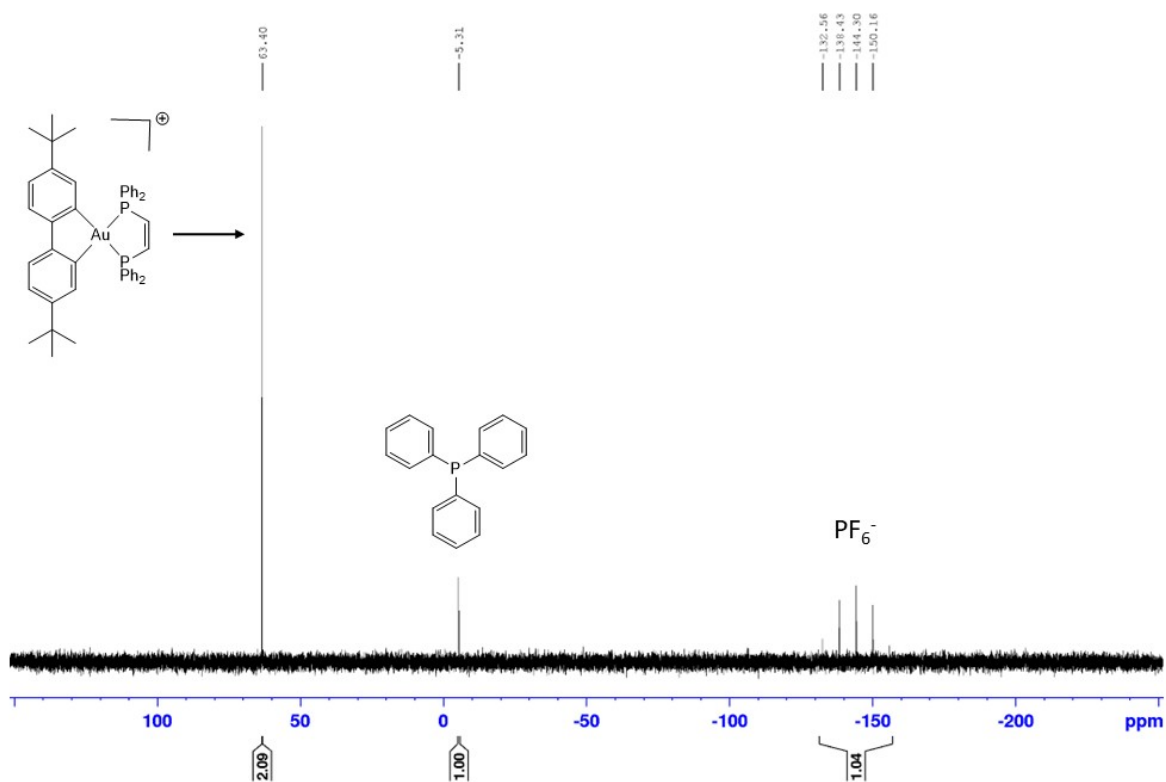

$^{31}\text{P}\{^1\text{H}\}$  NMR spectrum of complex **1** reacted 6 h at 298 K with 1 eq. of  $\text{BzSH}$  (table 1, entry 1).



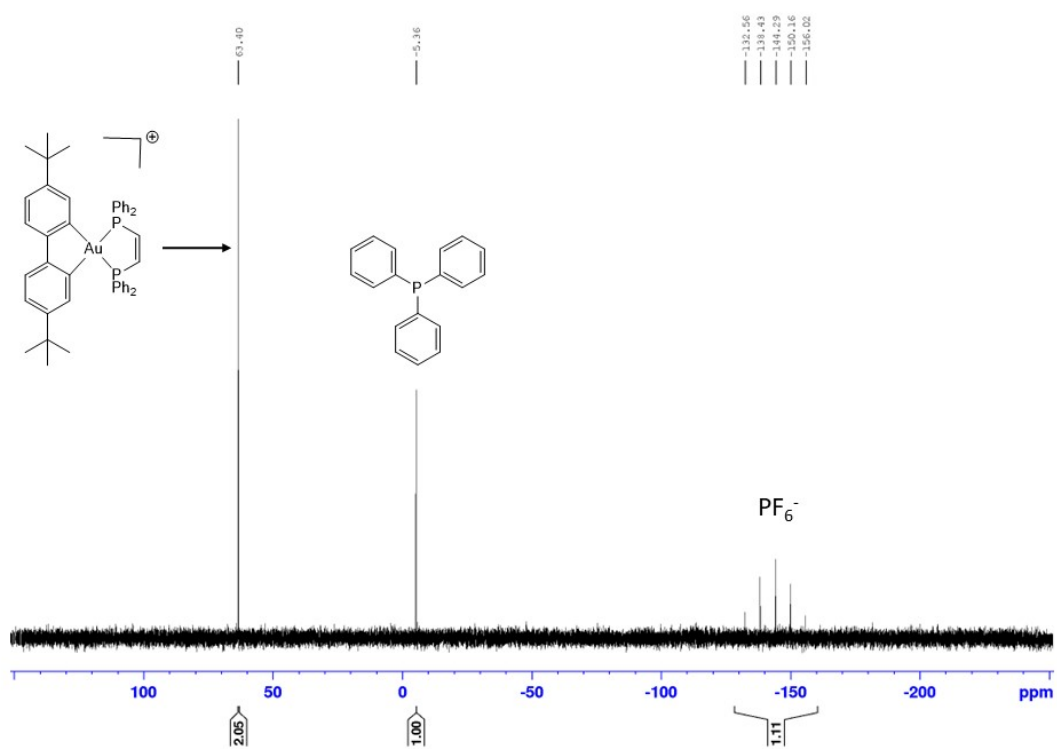

$^{31}\text{P}\{^1\text{H}\}$  NMR spectrum of complex **1** reacted 6 h at 323 K with 1 eq. of BzSH (table 1, entry 2).

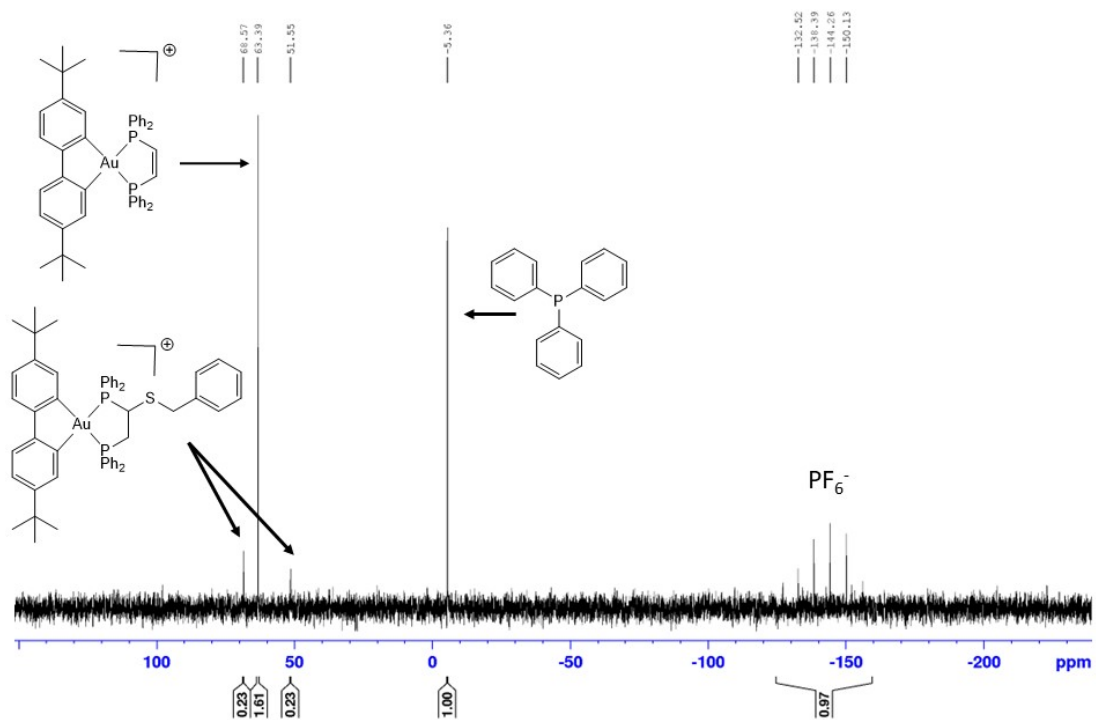

$^{31}\text{P}\{^1\text{H}\}$  NMR spectrum of complex **1** reacted 6 h at 323 K with 1 eq. of BzSH and 1 eq. of  $\text{NEt}_3$  (table 1, entry 3).

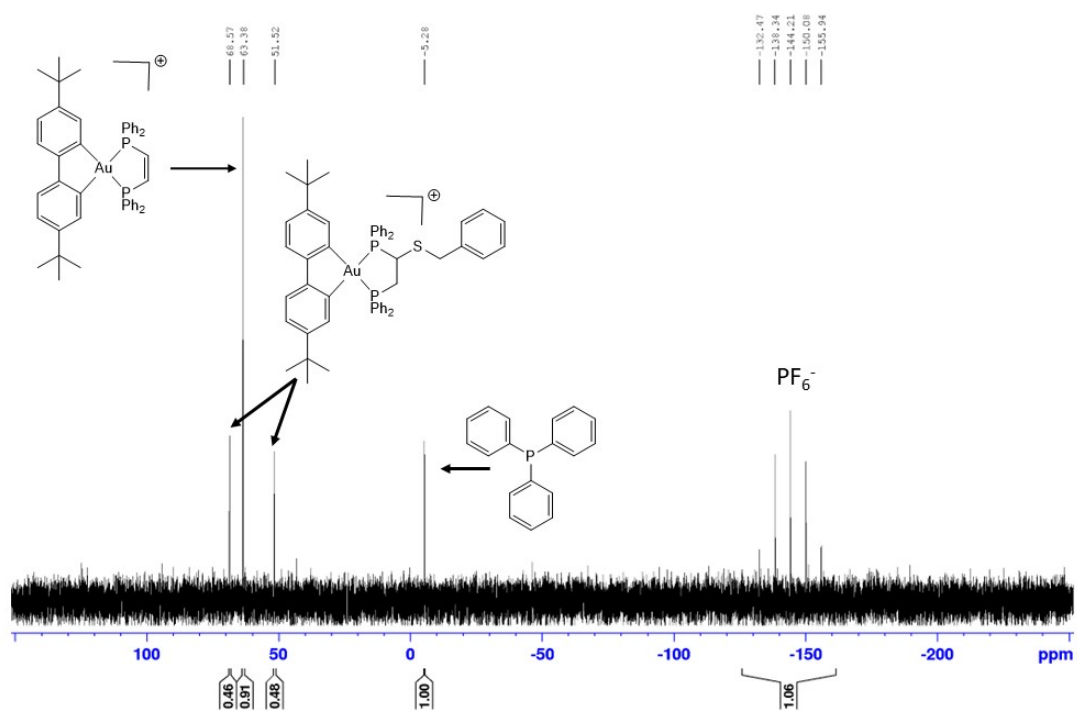

$^{31}\text{P}\{^1\text{H}\}$  NMR spectrum of complex **1** reacted 6 h at 323 K with 3 eq. of BzSH and 1 eq. of  $\text{NEt}_3$  (table 1, entry 4).

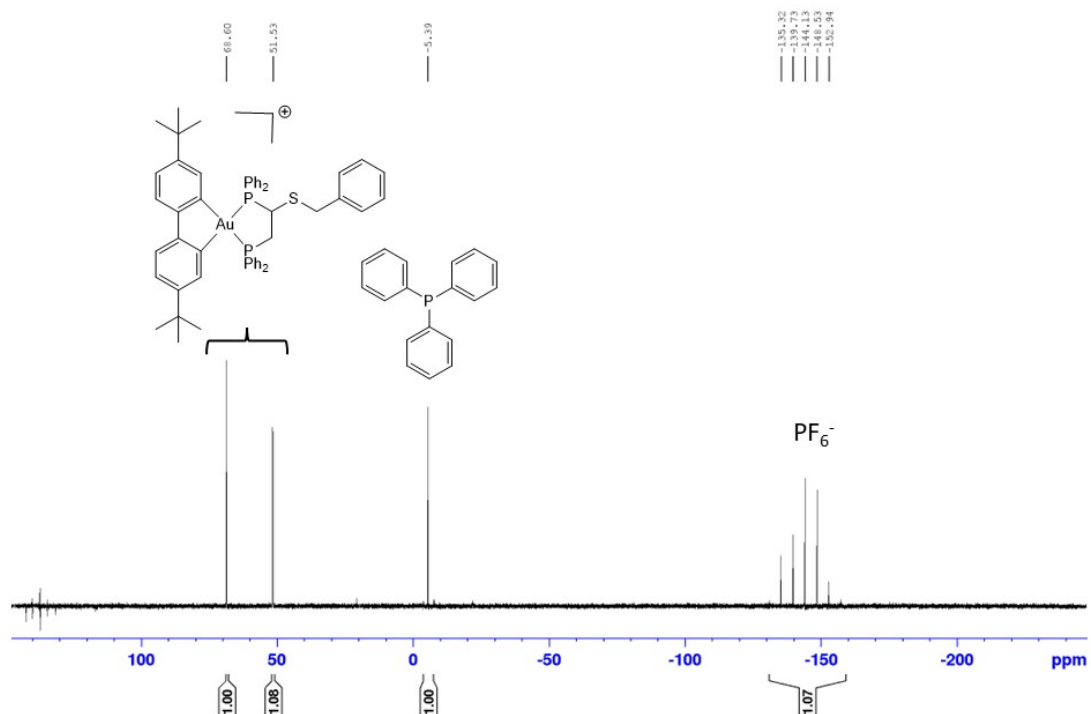

$^{31}\text{P}\{^1\text{H}\}$  NMR spectrum of complex **1** reacted 6 h at 323 K with 5 eq. of BzSH and 1 eq. of  $\text{NEt}_3$  (table 1, entry 5).

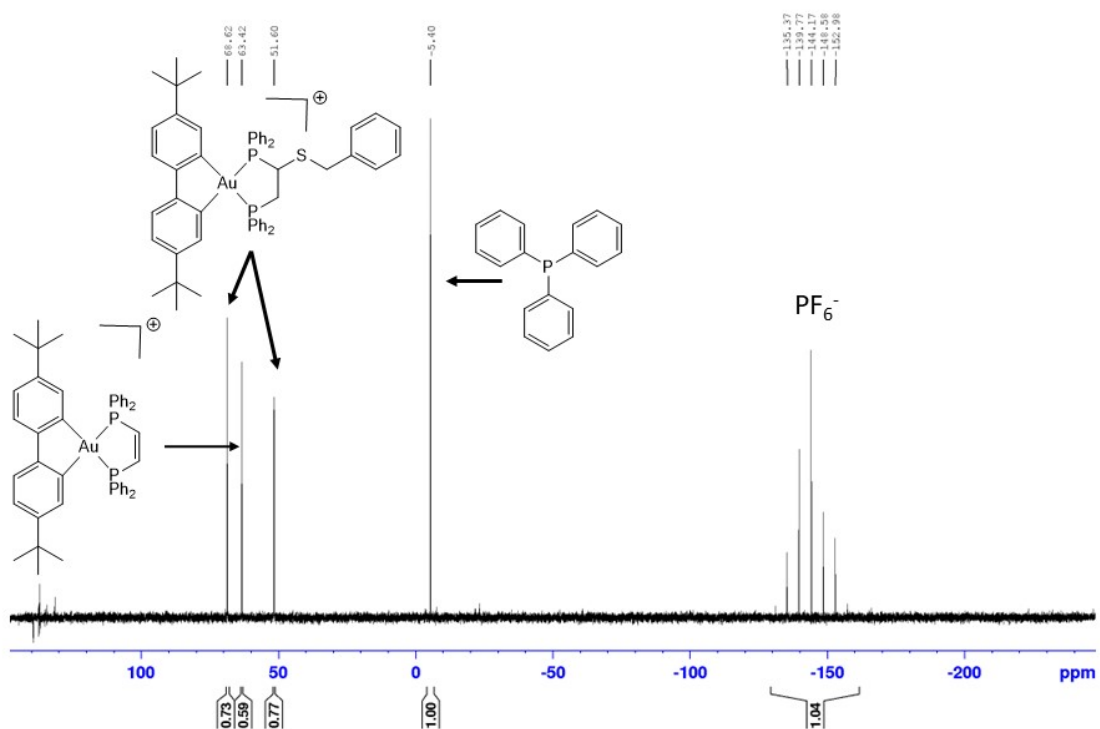

$^{31}\text{P}\{^1\text{H}\}$  NMR spectrum of complex **1** reacted 3 h at 323 K with 5 eq. of BzSH and 1 eq. of  $\text{NEt}_3$  (table 1, entry 6).

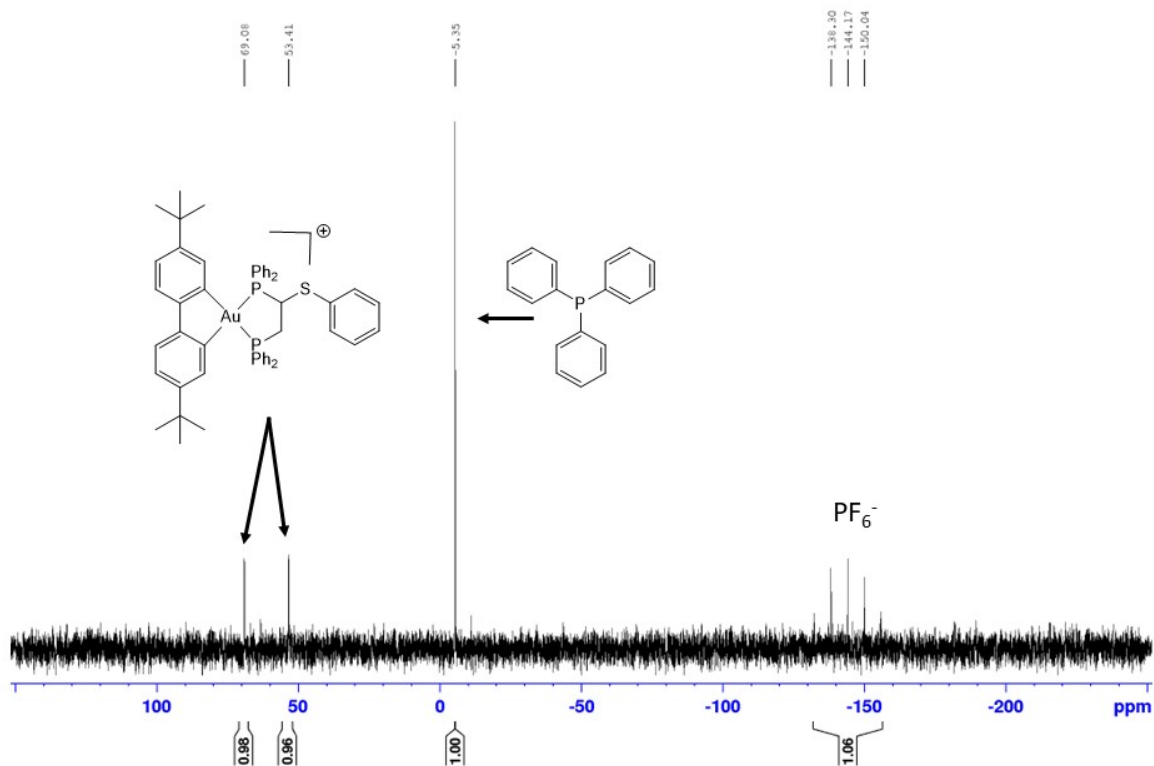

$^{31}\text{P}\{^1\text{H}\}$  NMR spectrum of complex **1** reacted 6 h at 323 K with 5 eq. of PhSH and 1 eq. of  $\text{NEt}_3$  (table 1, entry 7).

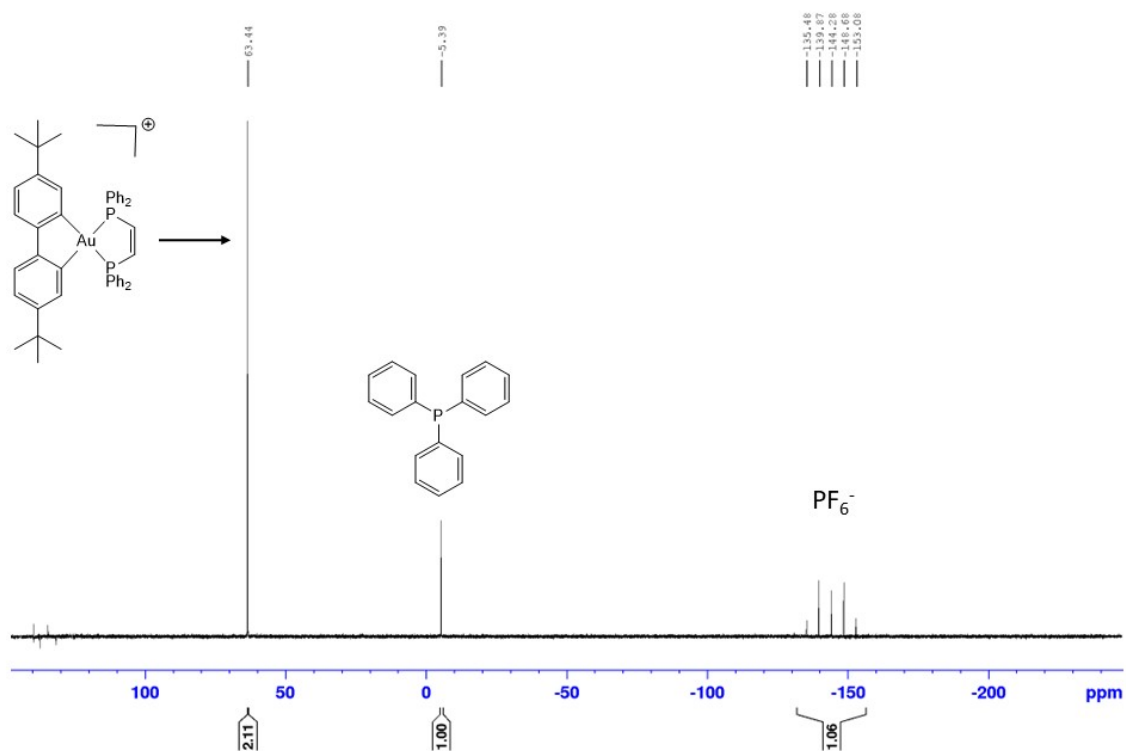

$^{31}\text{P}\{^1\text{H}\}$  NMR spectrum of complex **1** reacted 6 h at 323 K with 5 eq. of BzOH and 1 eq. of  $\text{NEt}_3$  (entry 8).

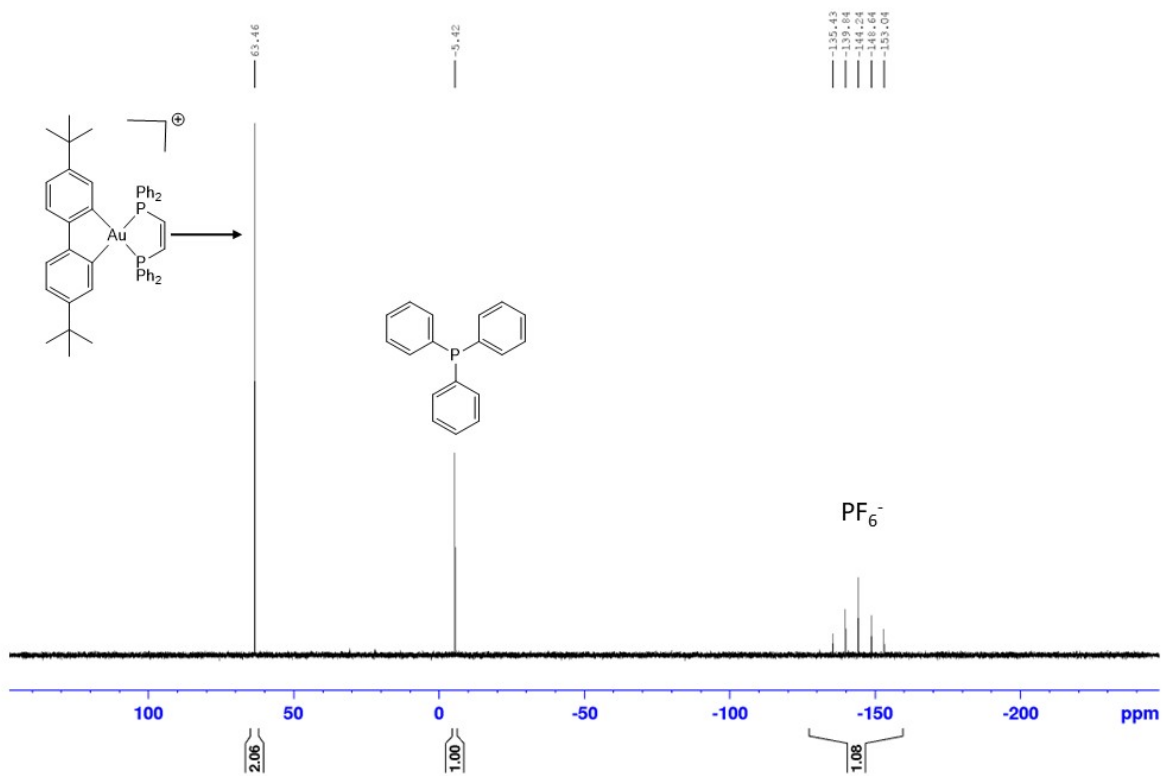

$^{31}\text{P}\{^1\text{H}\}$  NMR spectrum of complex **1** reacted 6 h at 323 K with 5 eq. of PhOH and 1 eq. of  $\text{NEt}_3$  (entry 9).

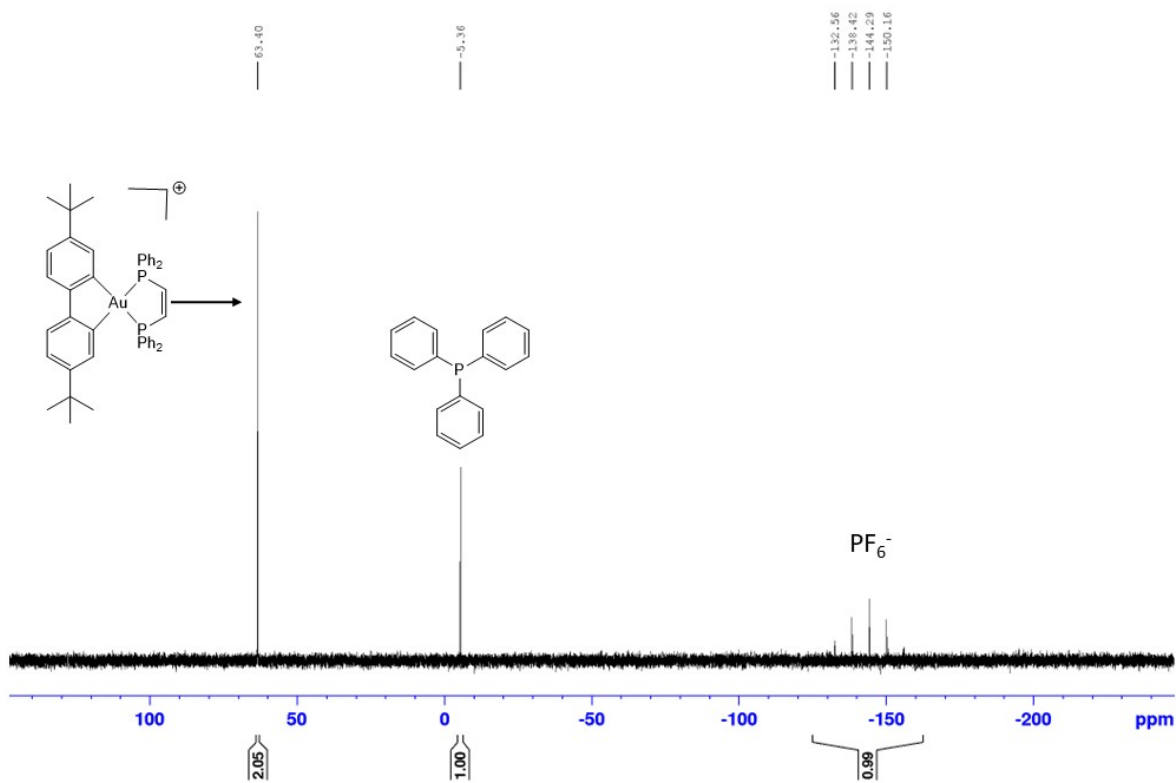

$^{31}\text{P}\{^1\text{H}\}$  NMR spectrum of complex 1 reacted 6 h at 323 K with 5 eq. of  $\text{BzNH}_2$  and 1 eq. of  $\text{NEt}_3$  (entry 10).

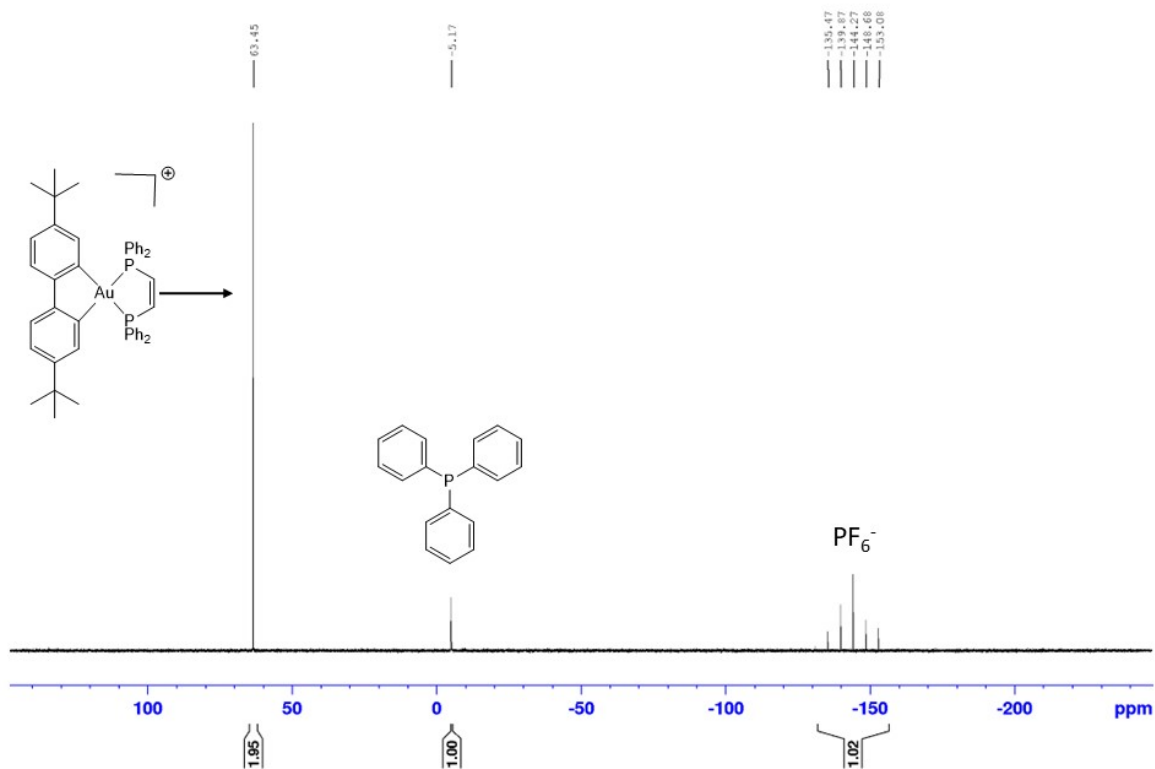

$^{31}\text{P}\{^1\text{H}\}$  NMR spectrum of complex 1 reacted 6 h at 323 K with 5 eq. of  $\text{PhNH}_2$  and 1 eq. of  $\text{NEt}_3$  (entry 11).

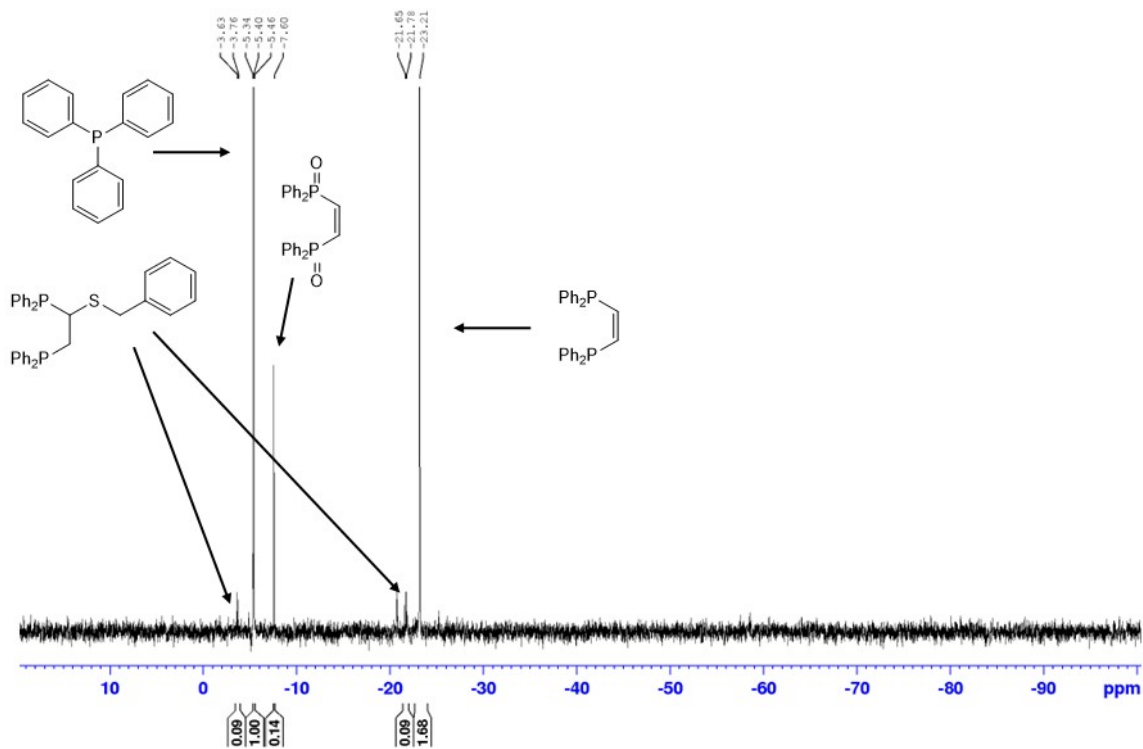

$^{31}\text{P}\{^1\text{H}\}$  NMR spectrum of free *cis*-1,2-diphenylphosphinoethylene reacted 6 h at 323 K with 5 eq. of BzSH and 1 eq. of  $\text{NEt}_3$ .

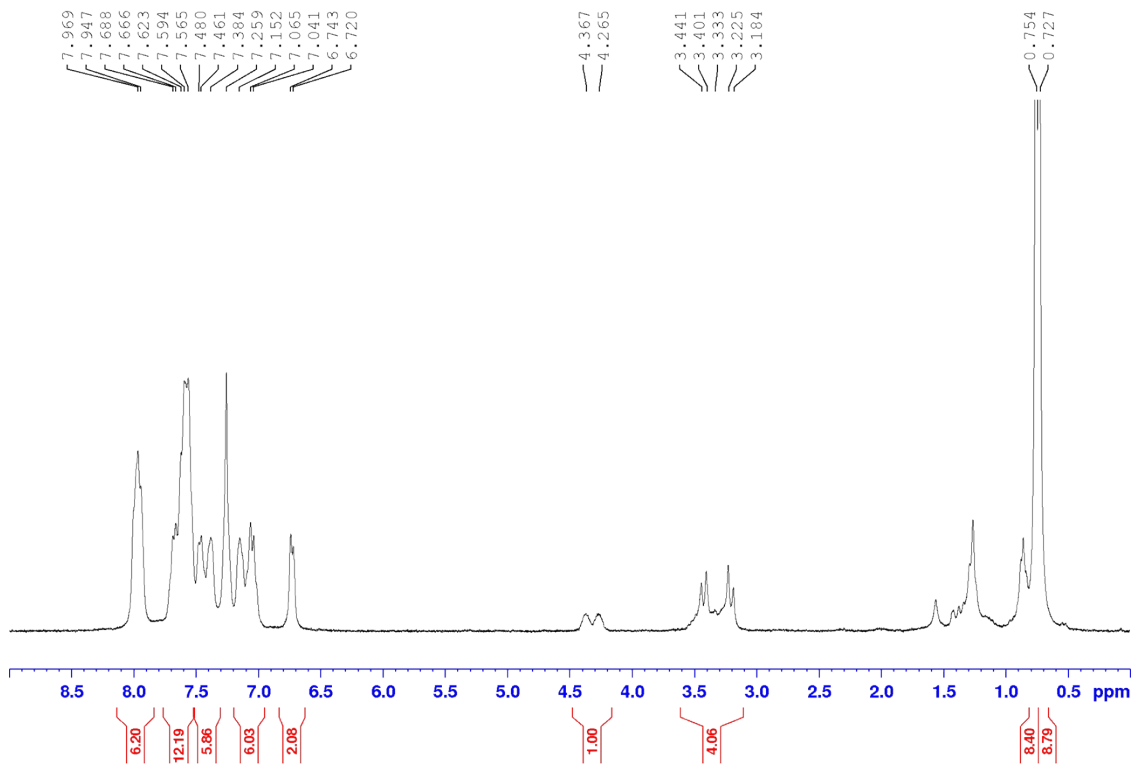

$^1\text{H}$  NMR spectrum of complex **2a** in  $\text{CDCl}_3$

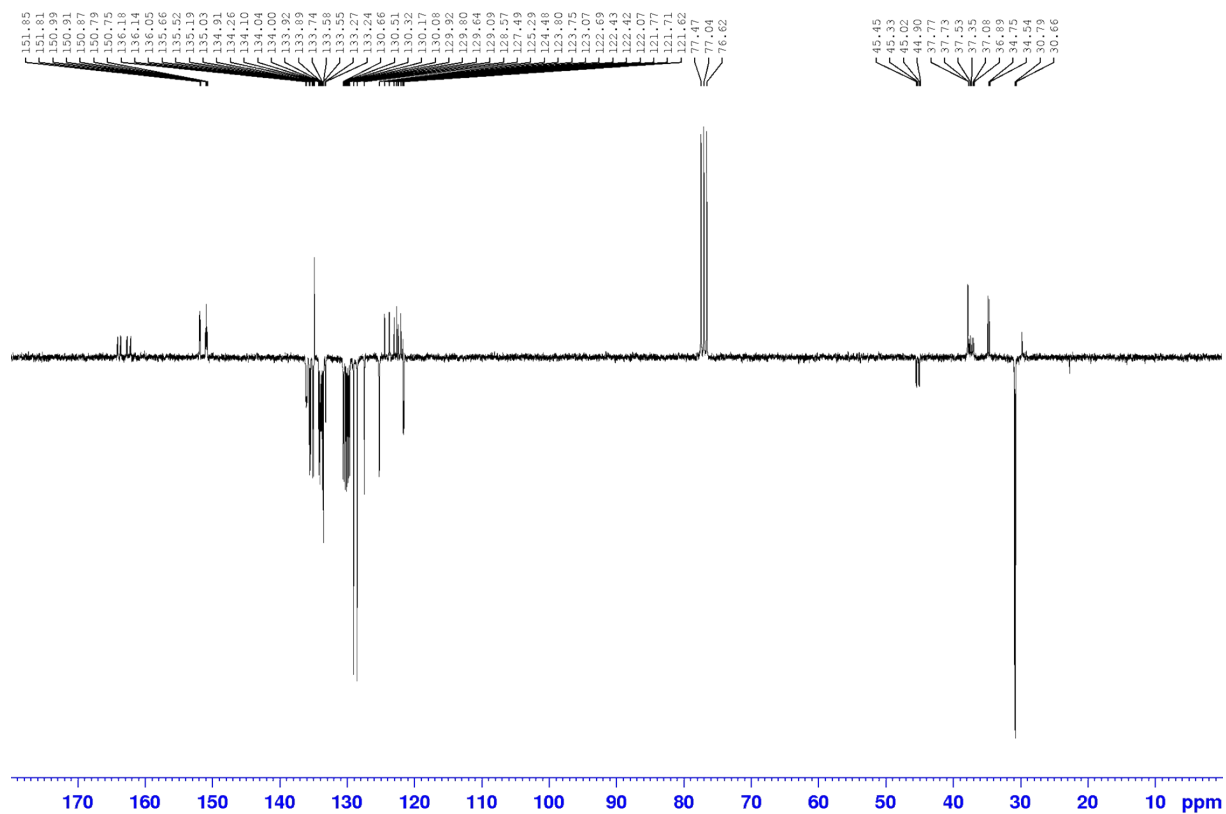

<sup>13</sup>C{<sup>1</sup>H} Jmod NMR spectrum of complex **2a** in CDCl<sub>3</sub>

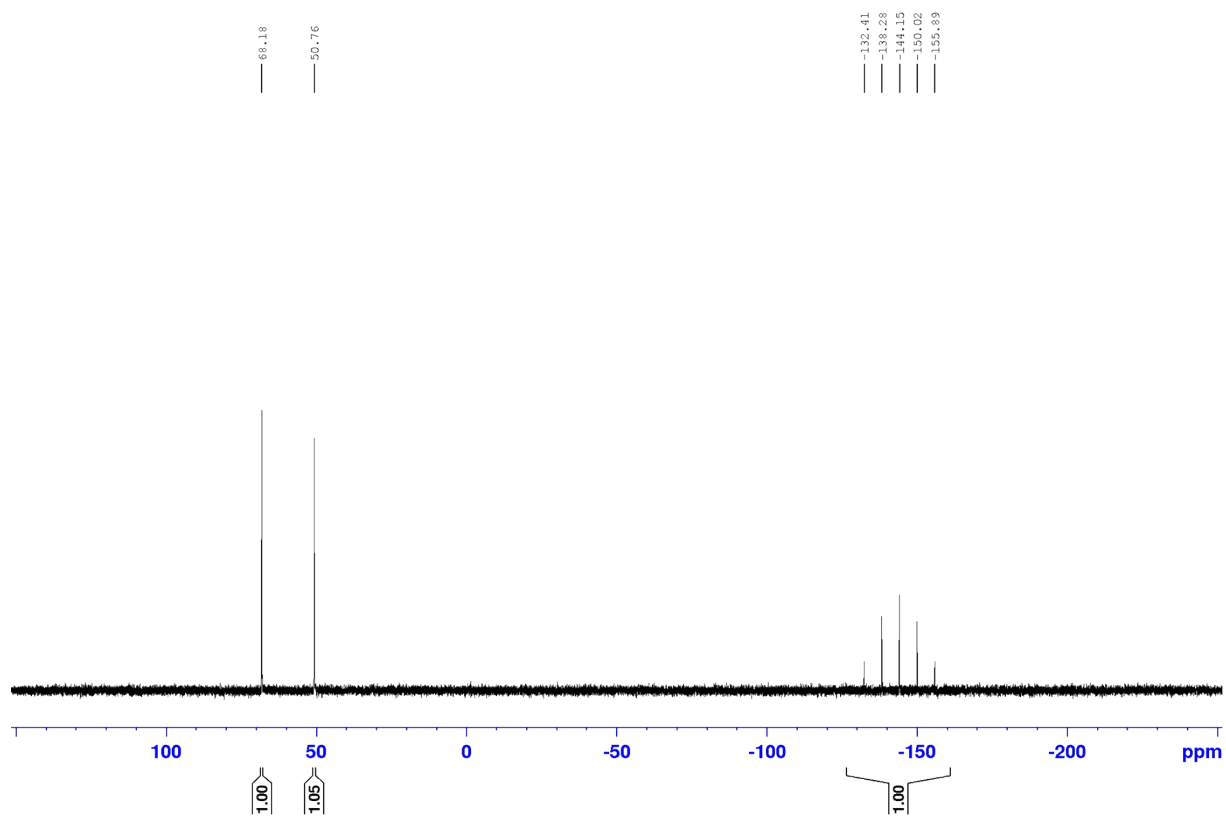

<sup>31</sup>P{<sup>1</sup>H} NMR spectrum of complex **2a** in CDCl<sub>3</sub>

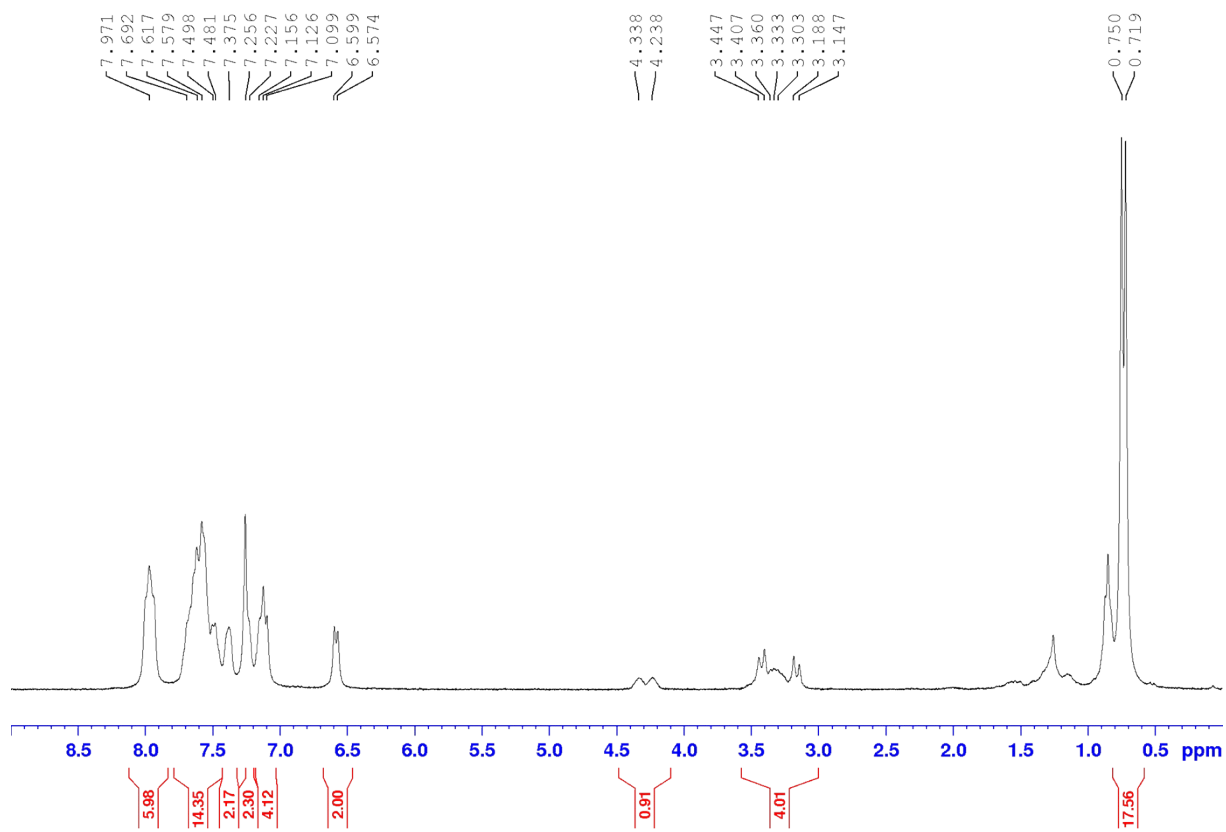

<sup>1</sup>H NMR spectrum of complex **2b** in CDCl<sub>3</sub>

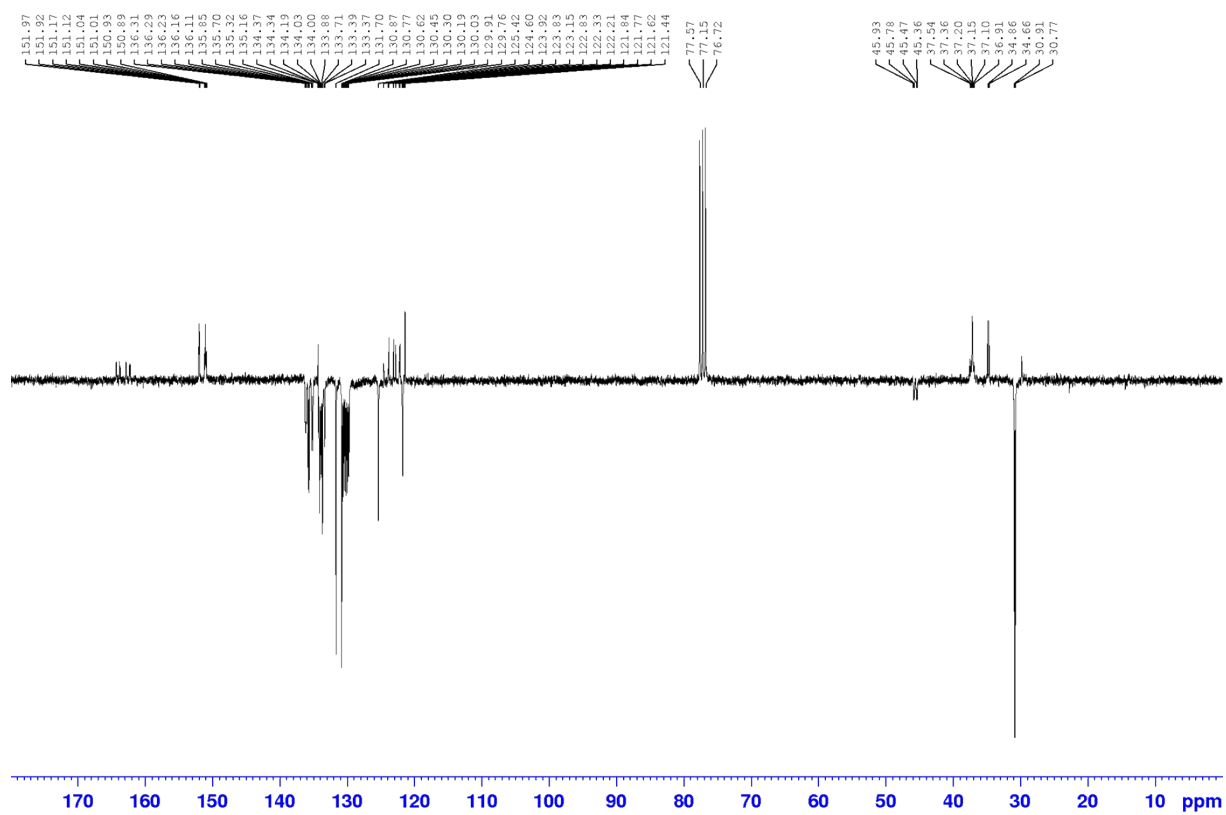

<sup>13</sup>C{<sup>1</sup>H} Jmod NMR spectrum of complex **2b** in CDCl<sub>3</sub>



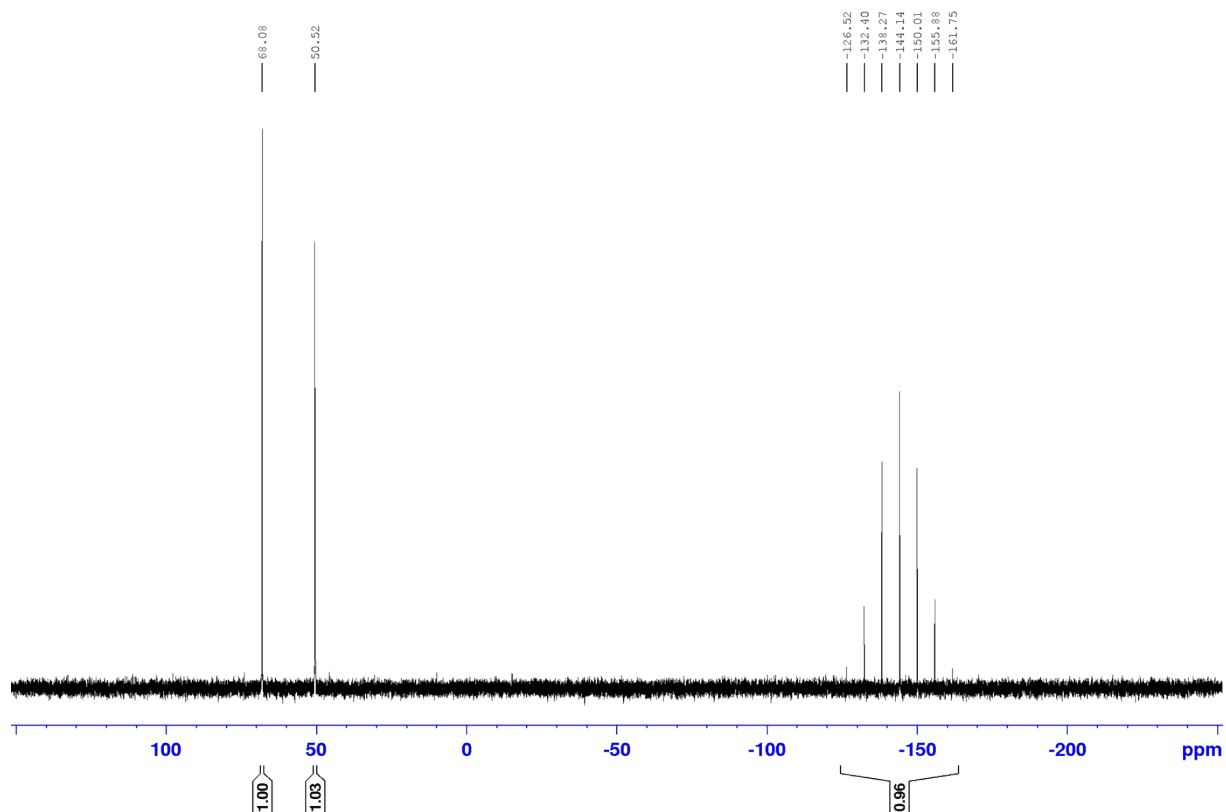

$^{31}\text{P}\{^1\text{H}\}$  NMR spectrum of complex **2b** in  $\text{CDCl}_3$

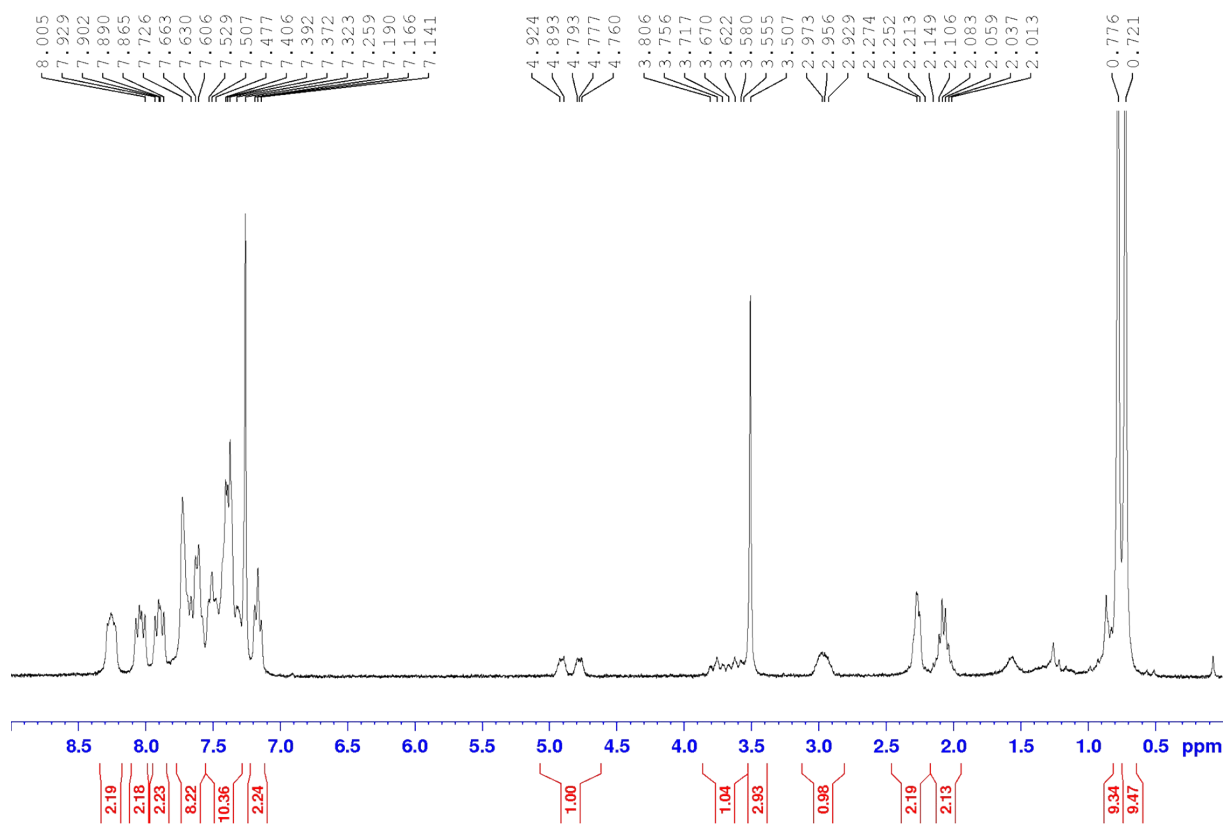

$^1\text{H}$  NMR spectrum of complex **2c** in  $\text{CDCl}_3$



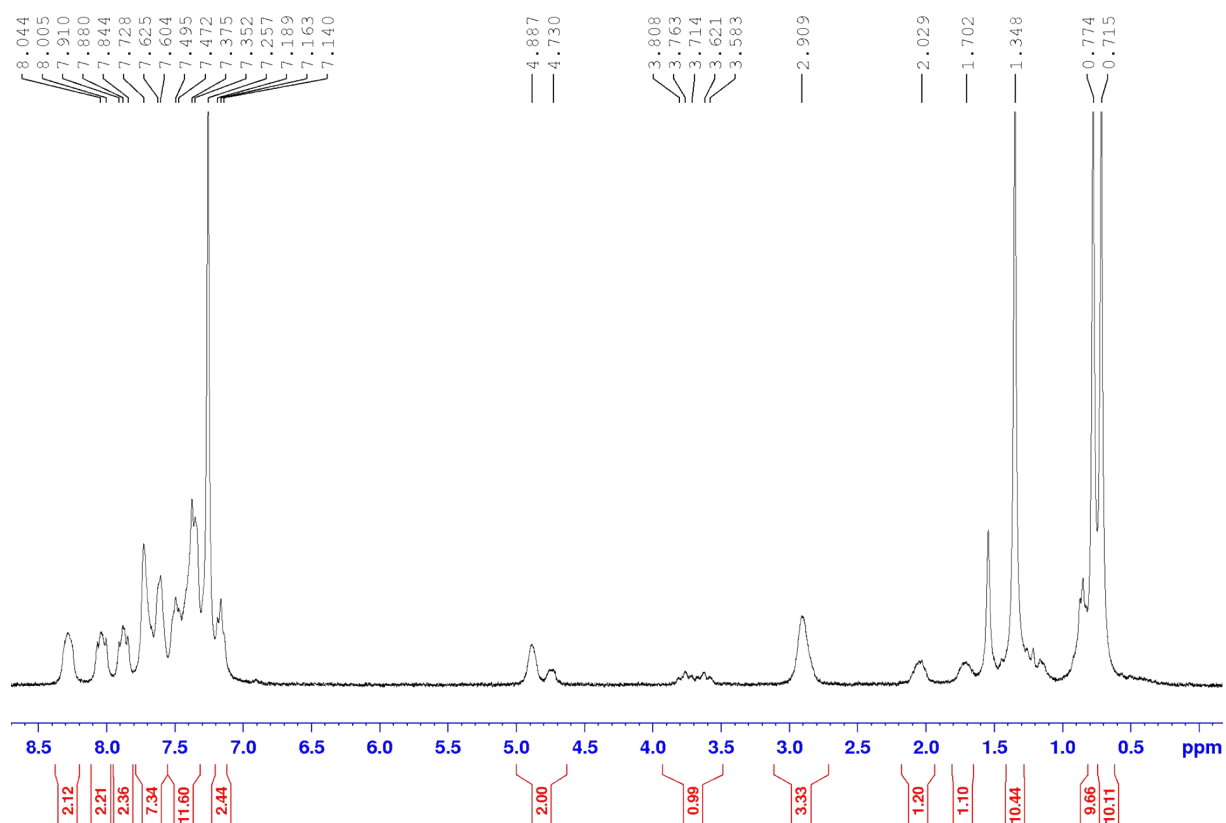

<sup>1</sup>H NMR spectrum of complex **2d** in CDCl<sub>3</sub>

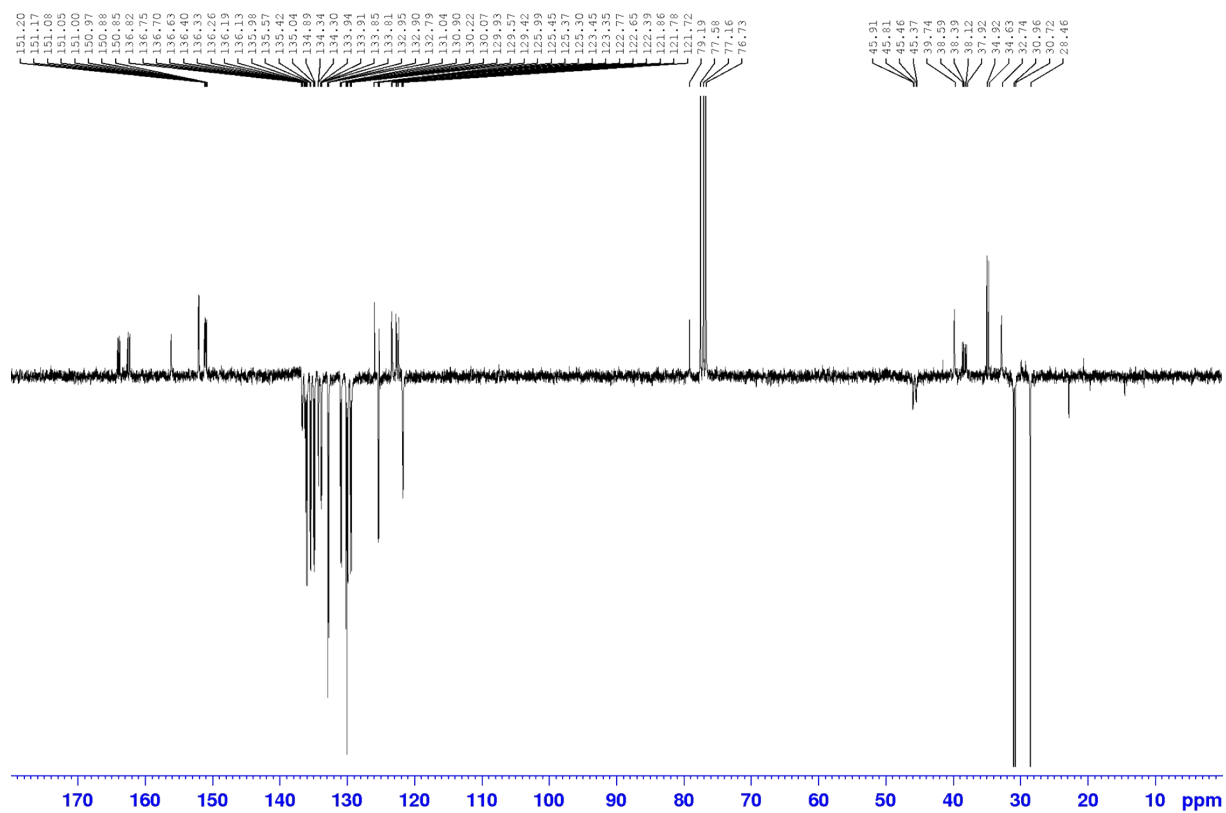

<sup>13</sup>C{<sup>1</sup>H} Jmod NMR spectrum of complex **2d** in CDCl<sub>3</sub>

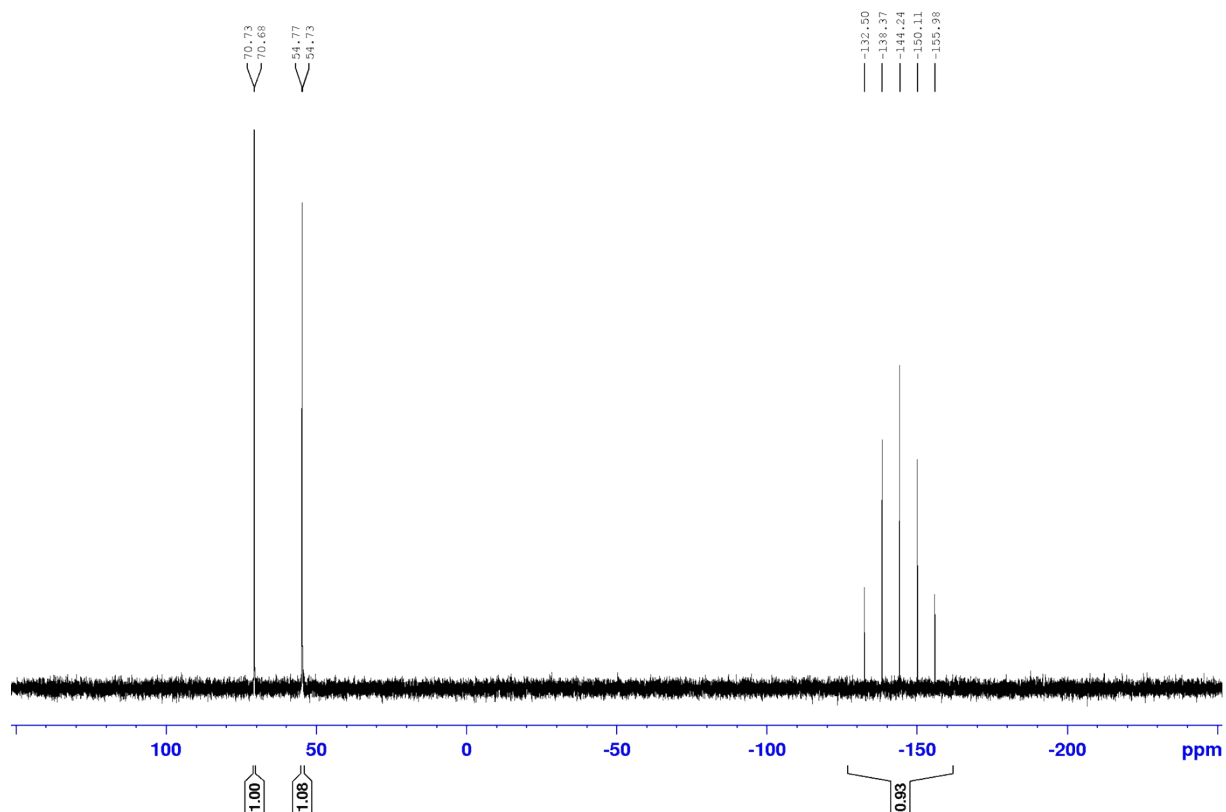

$^{31}\text{P}\{^1\text{H}\}$  NMR spectrum of complex **2d** in  $\text{CDCl}_3$

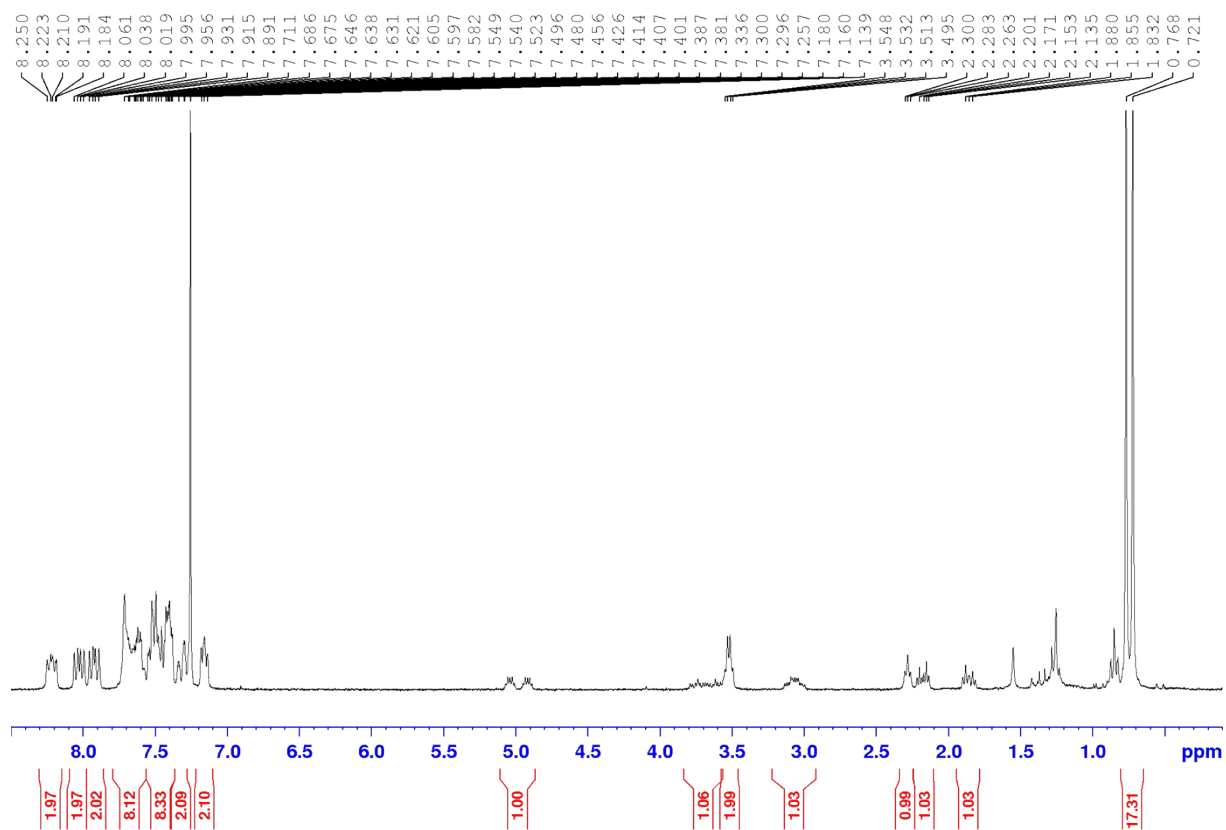

$^1\text{H}$  NMR spectrum of complex **2e** in  $\text{CDCl}_3$

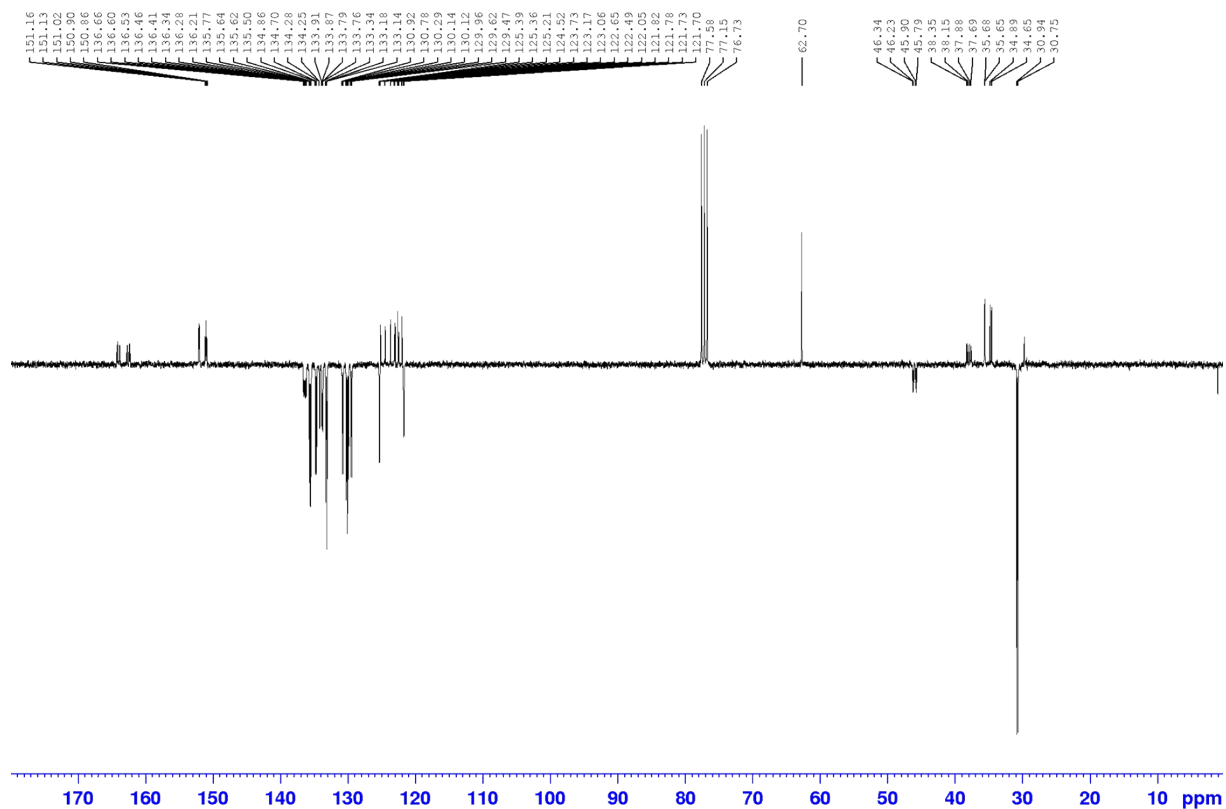

<sup>13</sup>C{<sup>1</sup>H} Jmod NMR spectrum of complex **2e** in CDCl<sub>3</sub>

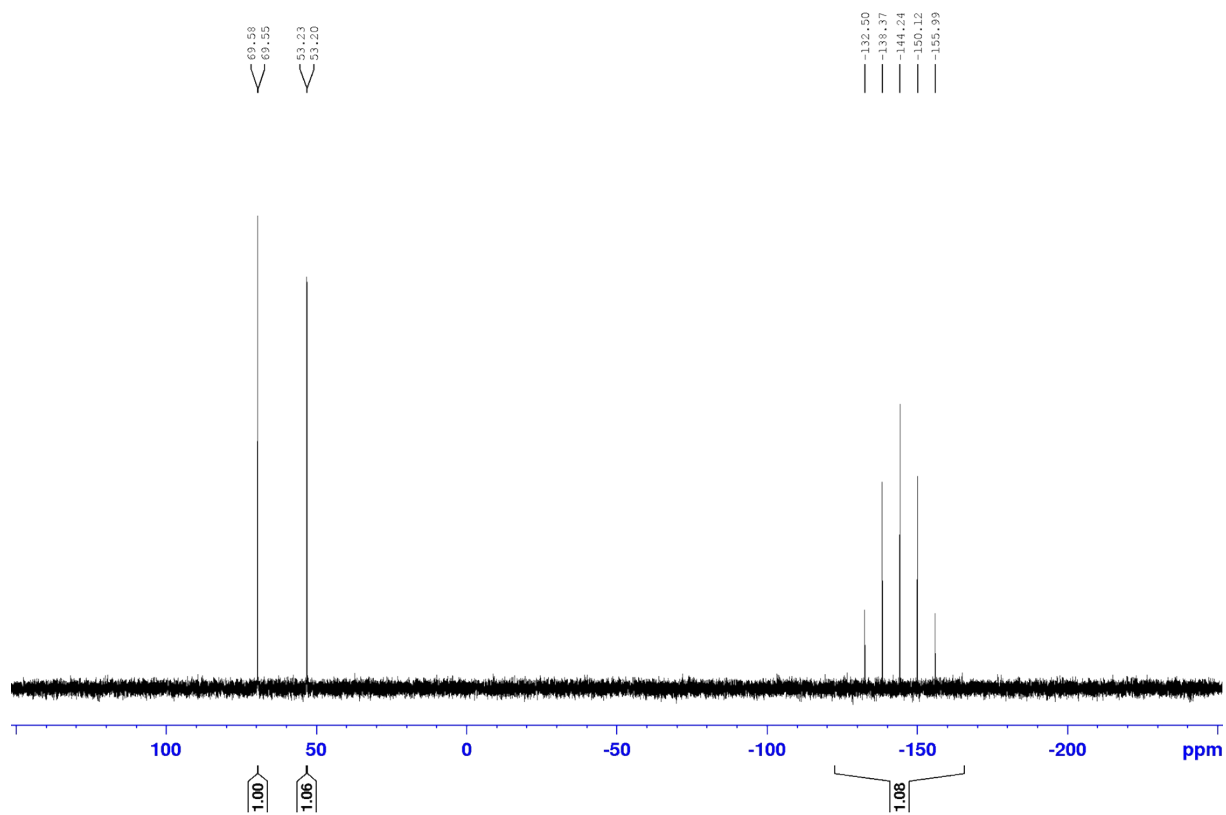

<sup>31</sup>P{<sup>1</sup>H} NMR spectrum of complex **2e** in CDCl<sub>3</sub>



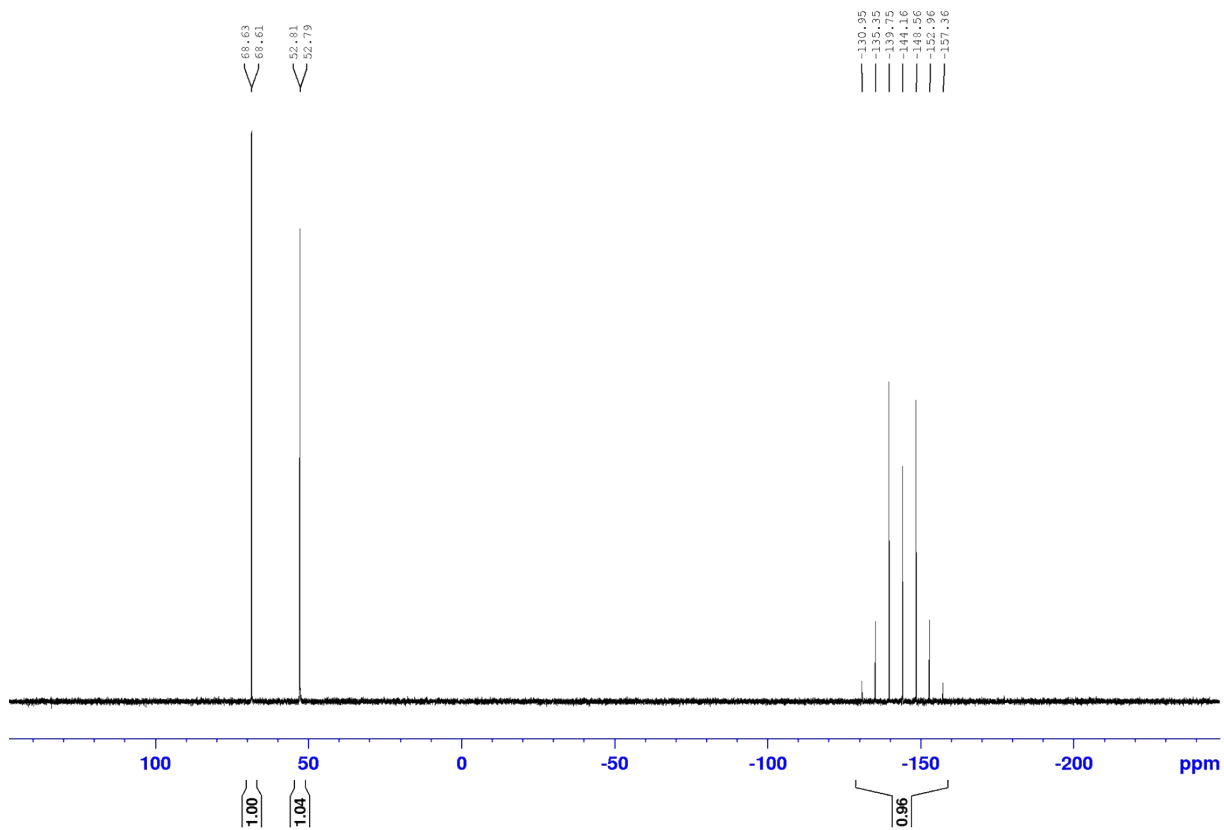

$^{31}\text{P}\{^1\text{H}\}$  NMR spectrum of complex **2f** in  $\text{CDCl}_3$

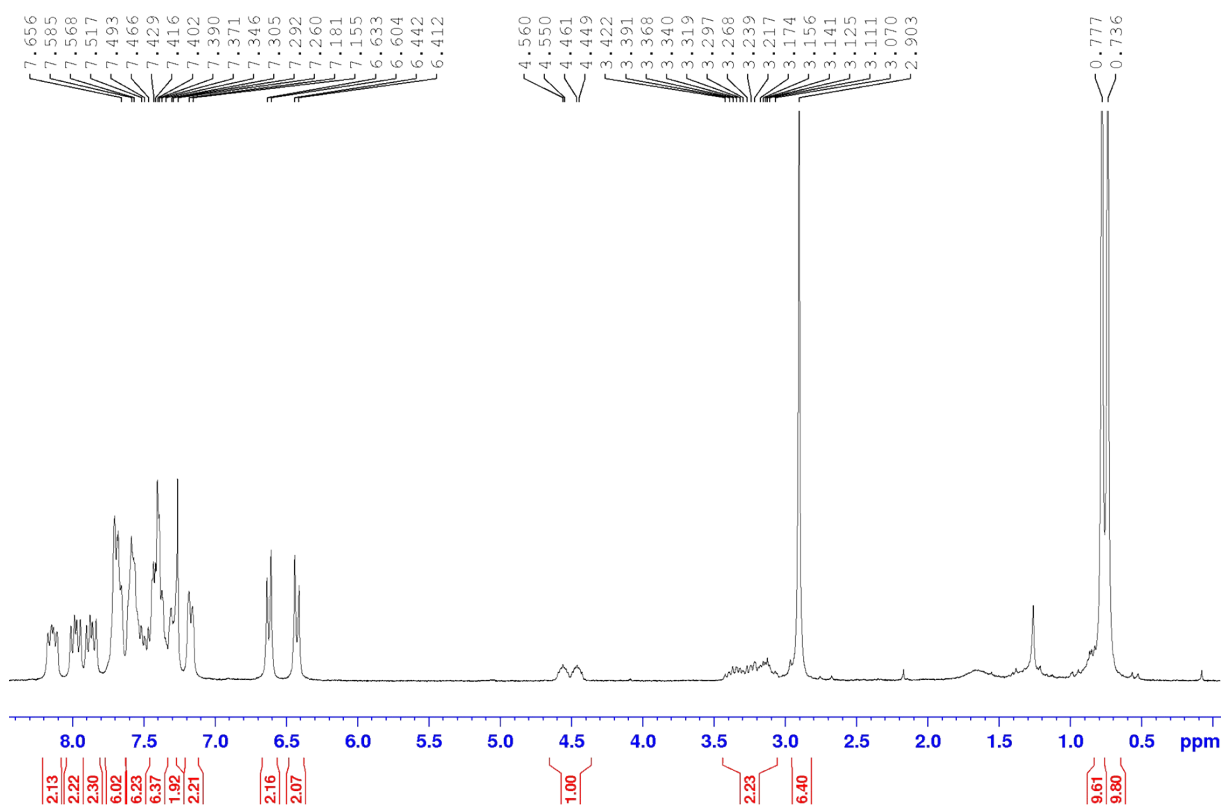

$^1\text{H}$  NMR spectrum of complex **2g** in  $\text{CDCl}_3$

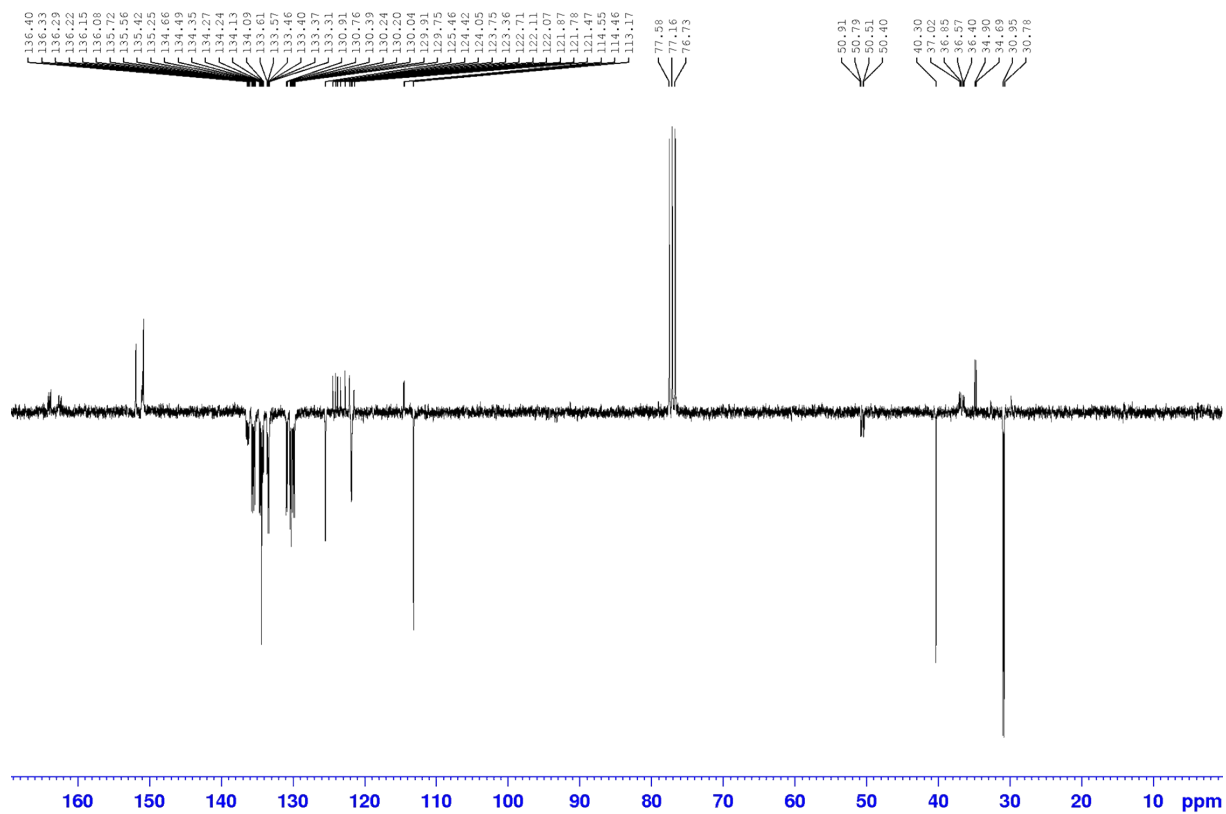

<sup>13</sup>C{<sup>1</sup>H} Jmod NMR spectrum of complex **2g** in CDCl<sub>3</sub>

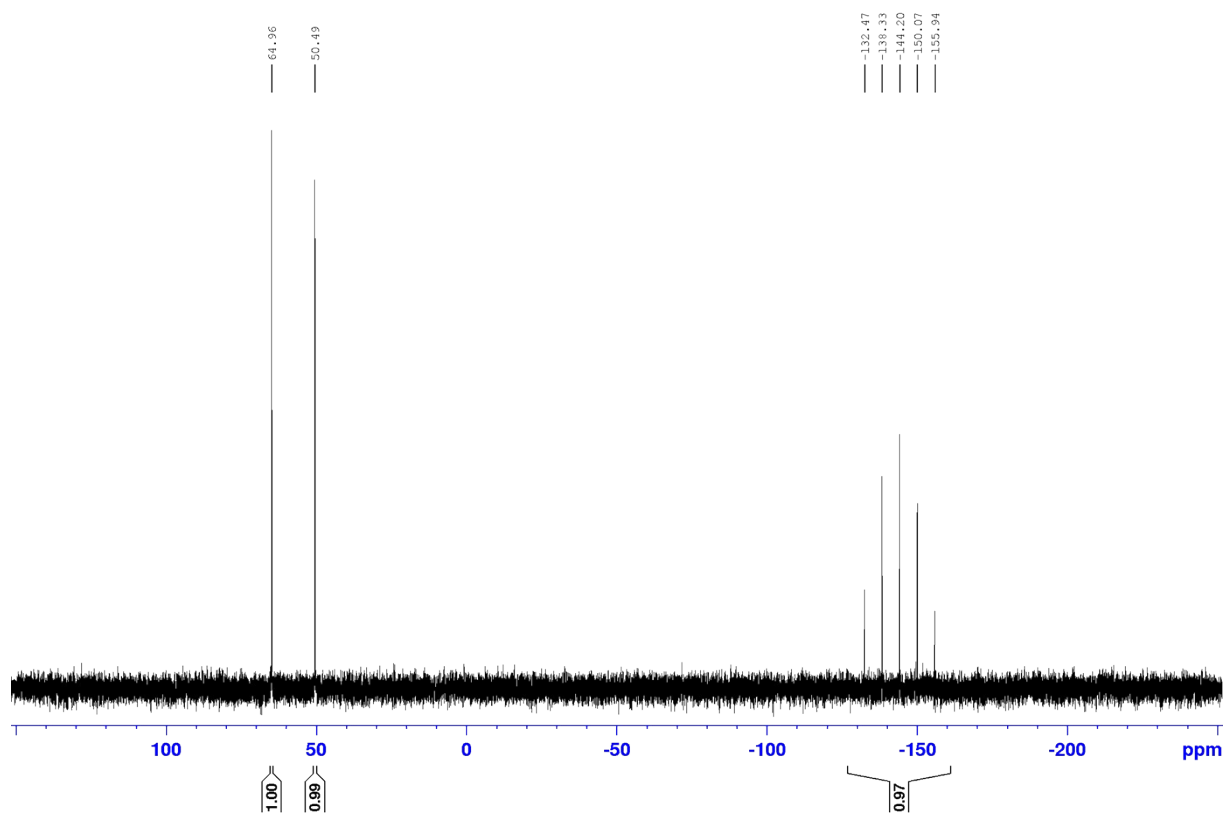

<sup>31</sup>P{<sup>1</sup>H} NMR spectrum of complex **2g** in CDCl<sub>3</sub>



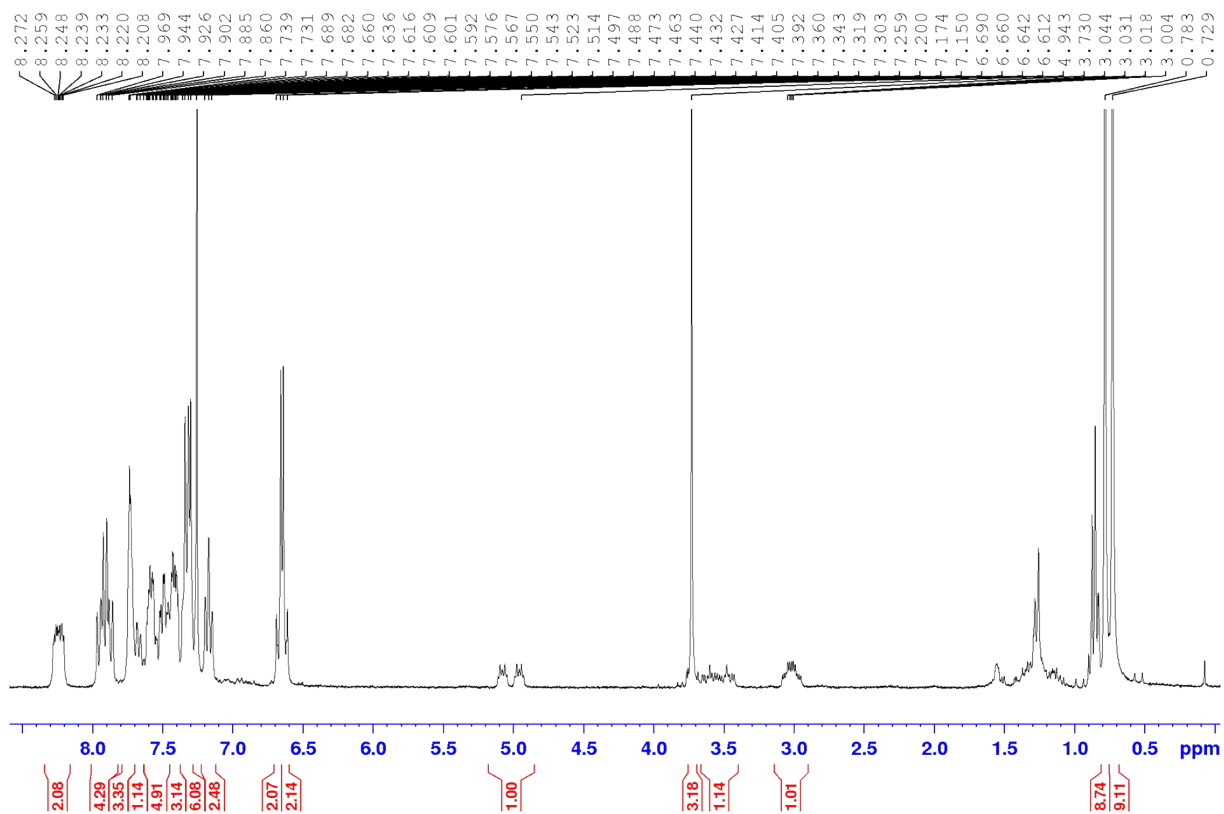

<sup>1</sup>H NMR spectrum of complex **2h** in CDCl<sub>3</sub>

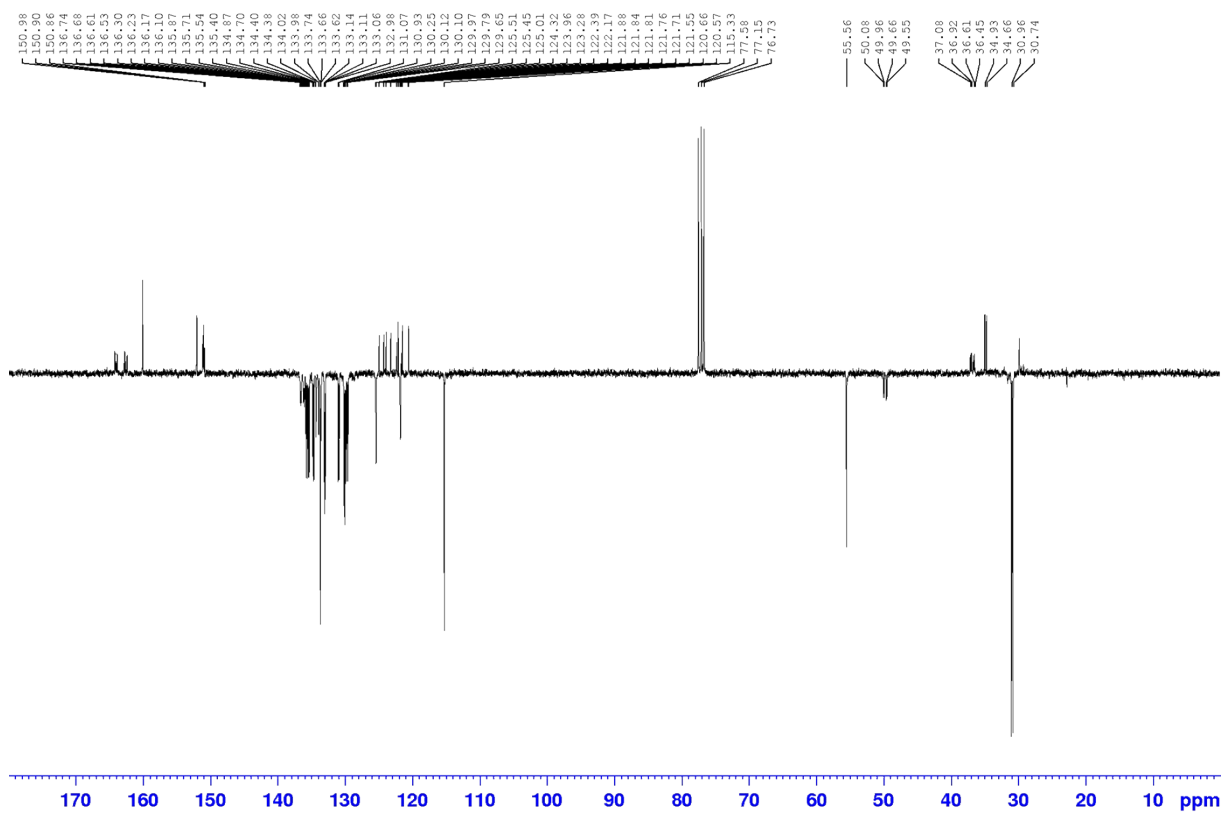

<sup>13</sup>C{<sup>1</sup>H} Jmod NMR spectrum of complex **2h** in CDCl<sub>3</sub>

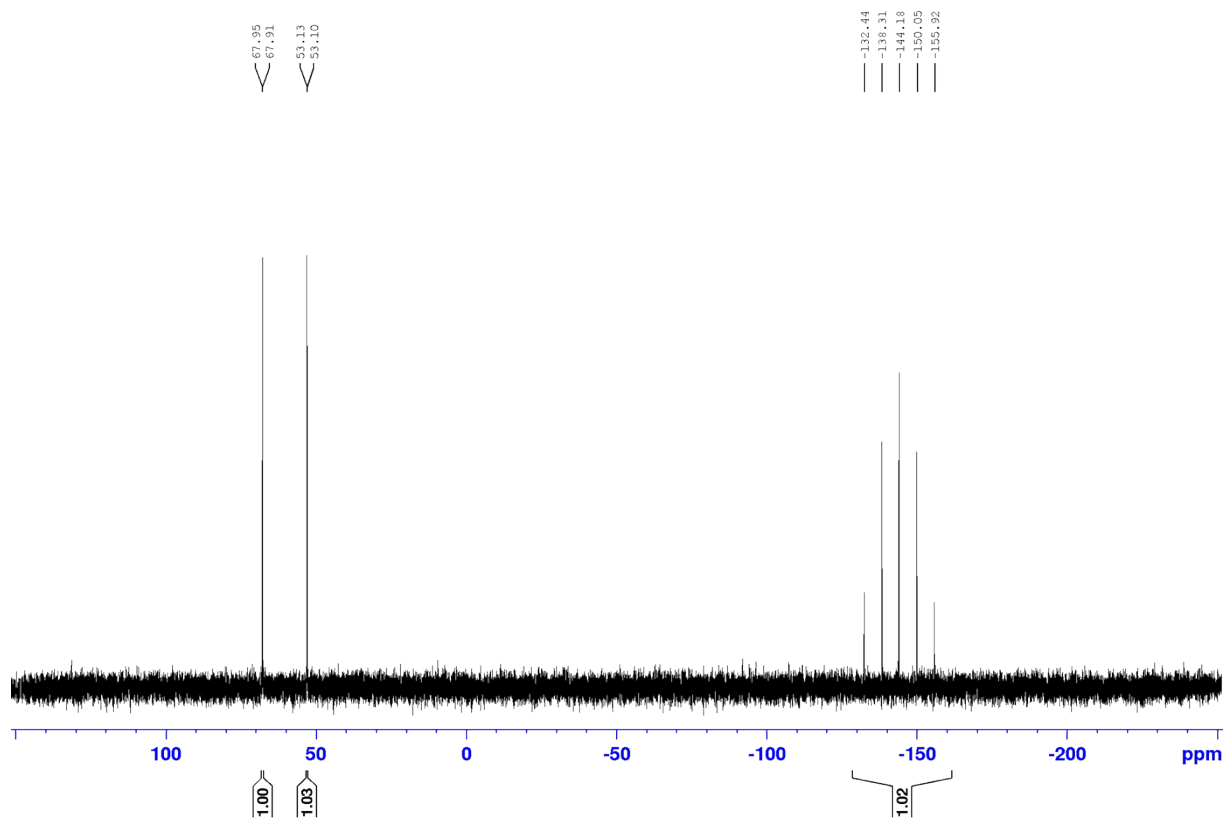

$^{31}\text{P}\{^1\text{H}\}$  NMR spectrum of complex **2h** in  $\text{CDCl}_3$

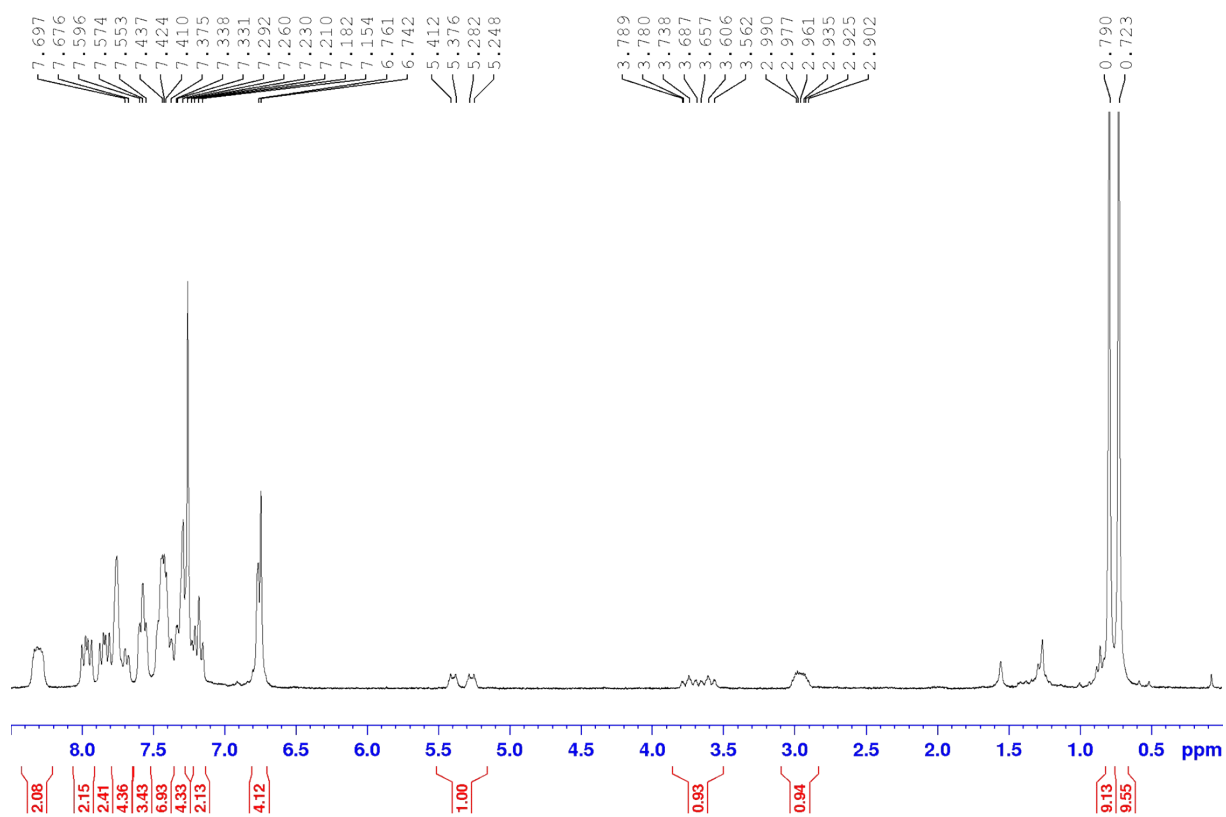

$^1\text{H}$  NMR spectrum of complex **2i** in  $\text{CDCl}_3$

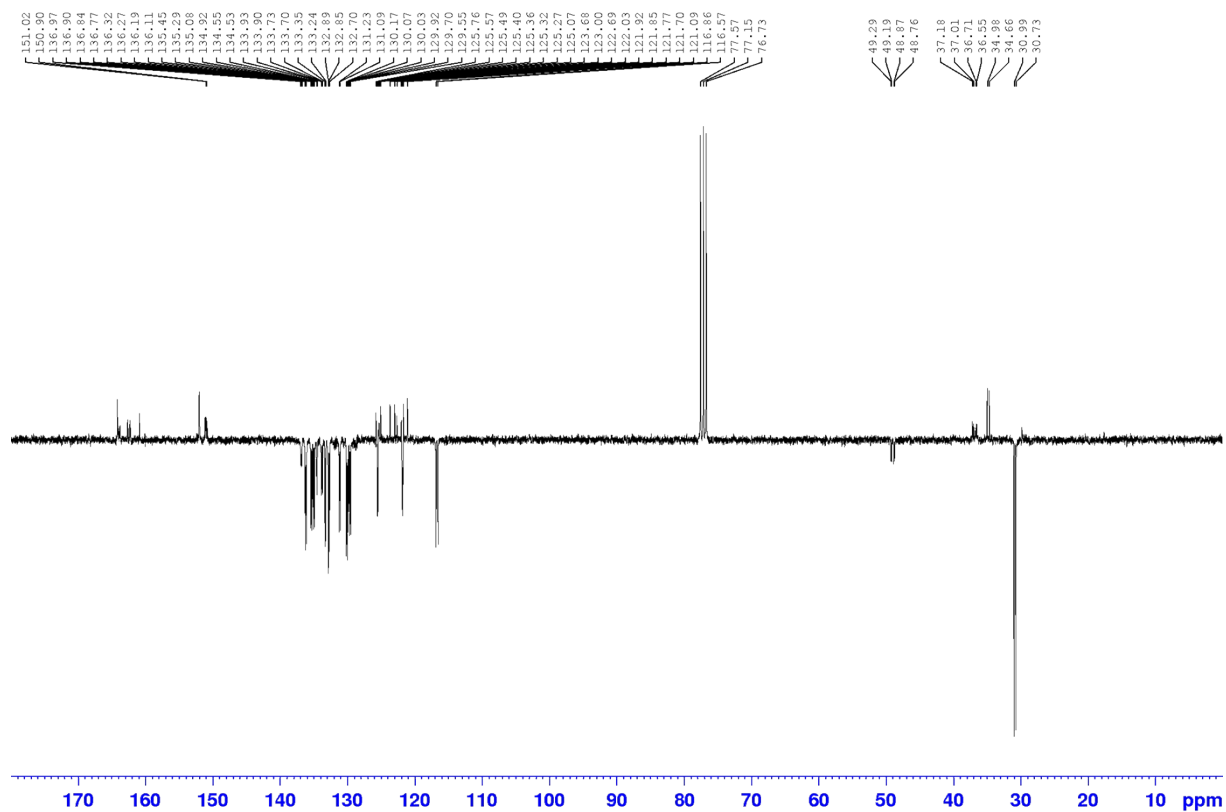

<sup>13</sup>C{<sup>1</sup>H} Jmod NMR spectrum of complex **2i** in CDCl<sub>3</sub>

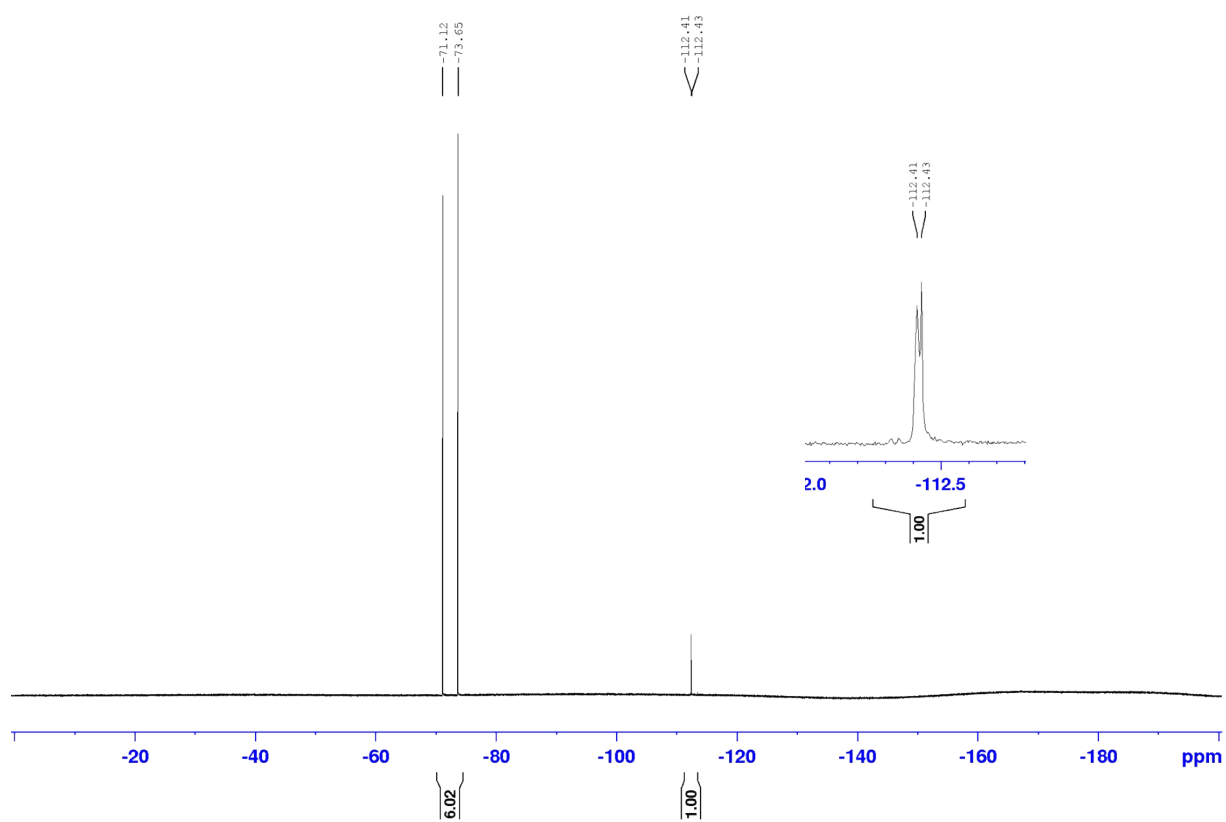

<sup>19</sup>F{<sup>1</sup>H} NMR spectrum of complex **2i** in CDCl<sub>3</sub>

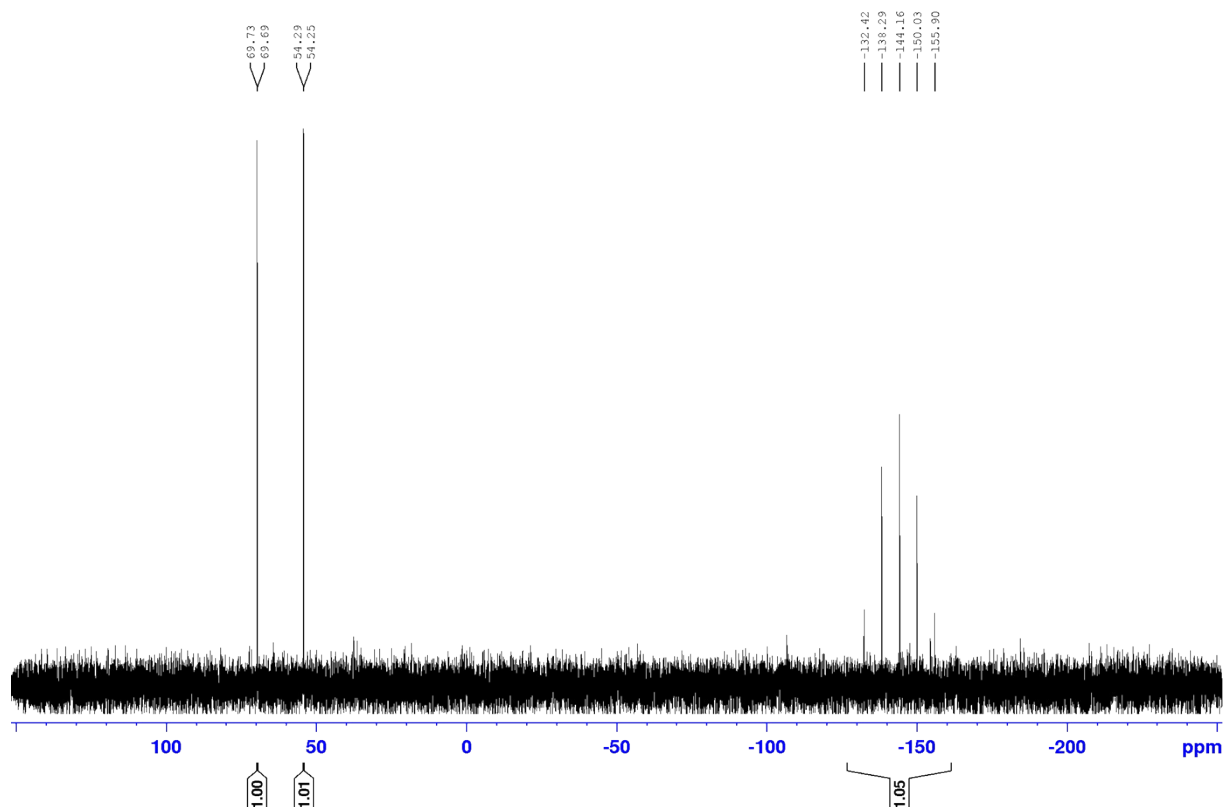

$^{31}\text{P}\{^1\text{H}\}$  NMR spectrum of complex **2i** in  $\text{CDCl}_3$

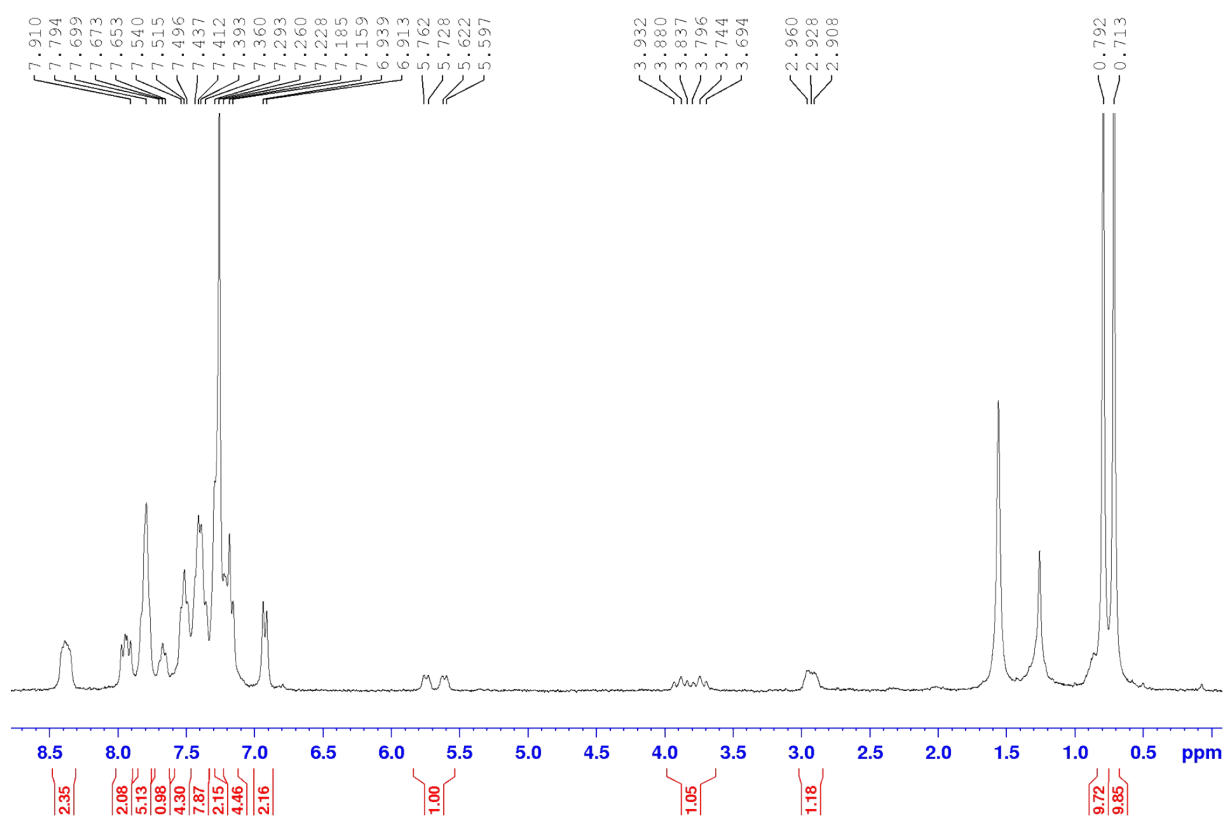

$^1\text{H}$  NMR spectrum of complex **2j** in  $\text{CDCl}_3$

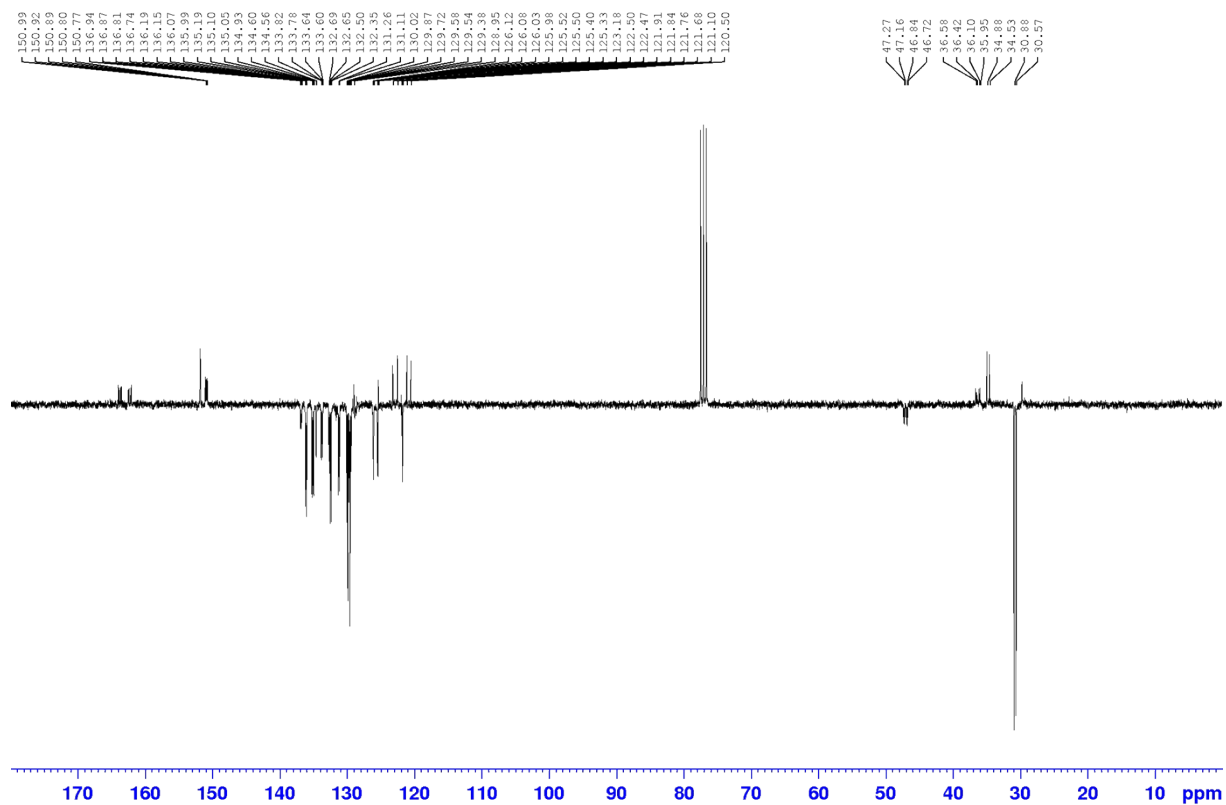

$^{13}\text{C}\{^1\text{H}\}$  Jmod NMR spectrum of complex **2j** in  $\text{CDCl}_3$

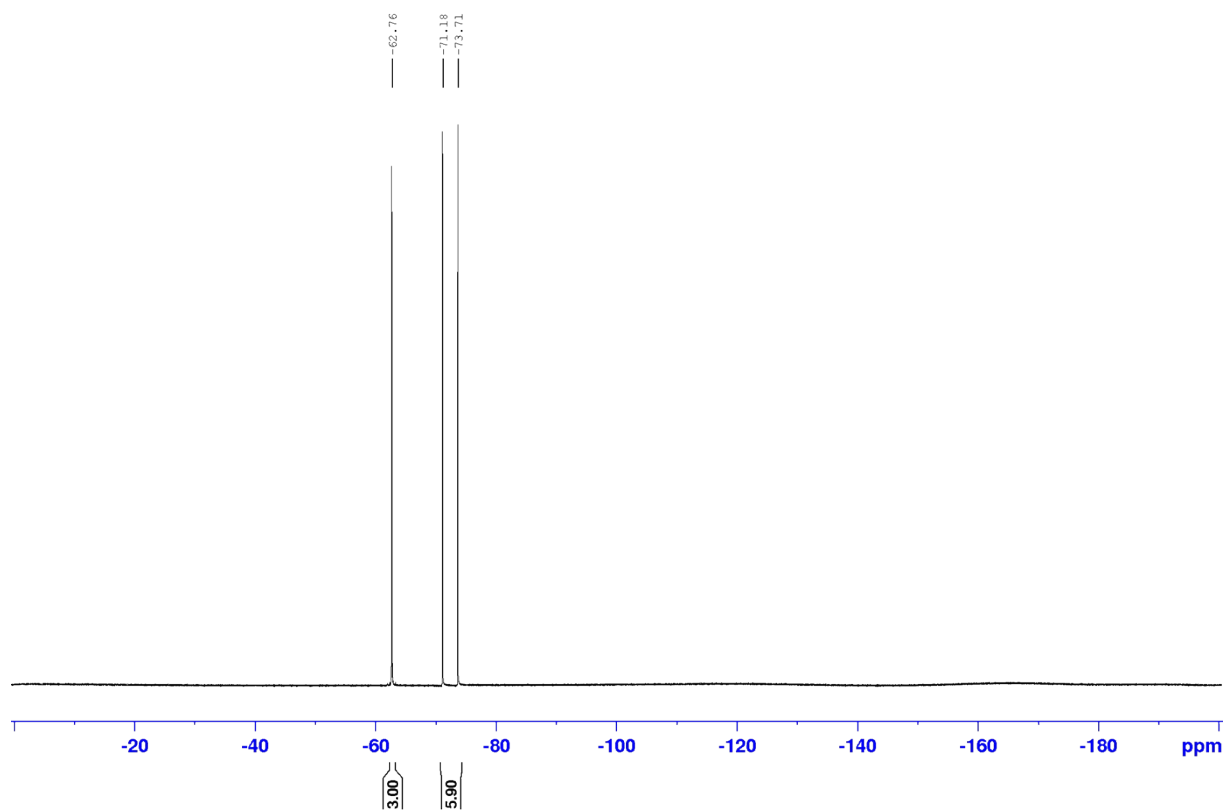

$^{19}\text{F}\{^1\text{H}\}$  NMR spectrum of complex **2j** in  $\text{CDCl}_3$

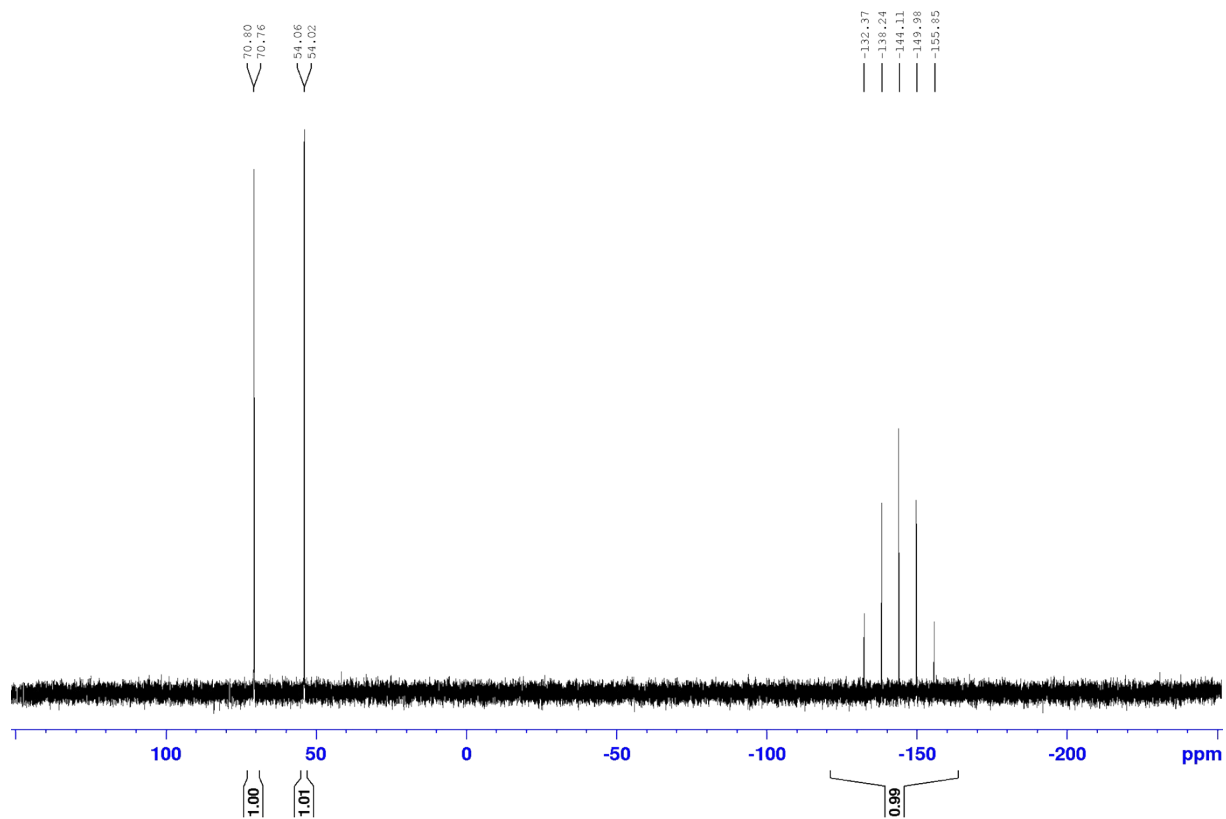

$^{31}\text{P}\{^1\text{H}\}$  NMR spectrum of complex **2j** in  $\text{CDCl}_3$

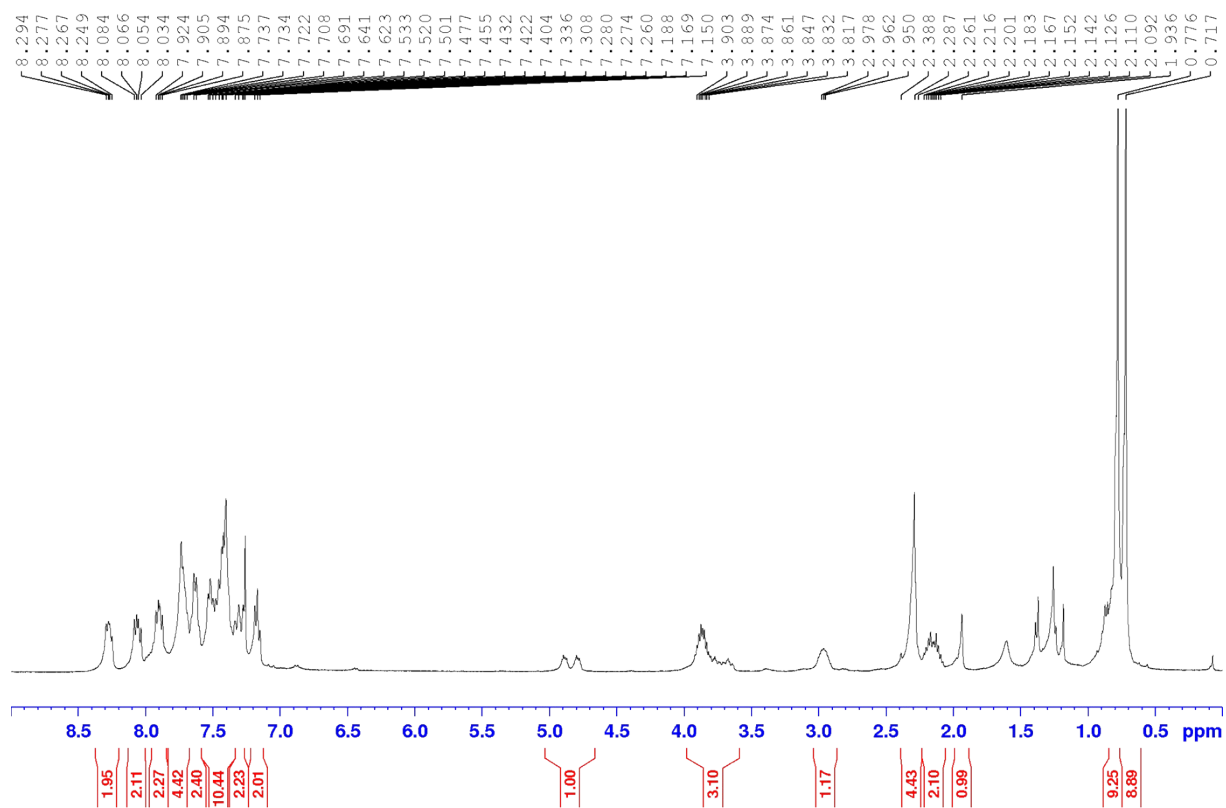

$^1\text{H}$  NMR spectrum of complex **3** in  $\text{CDCl}_3$

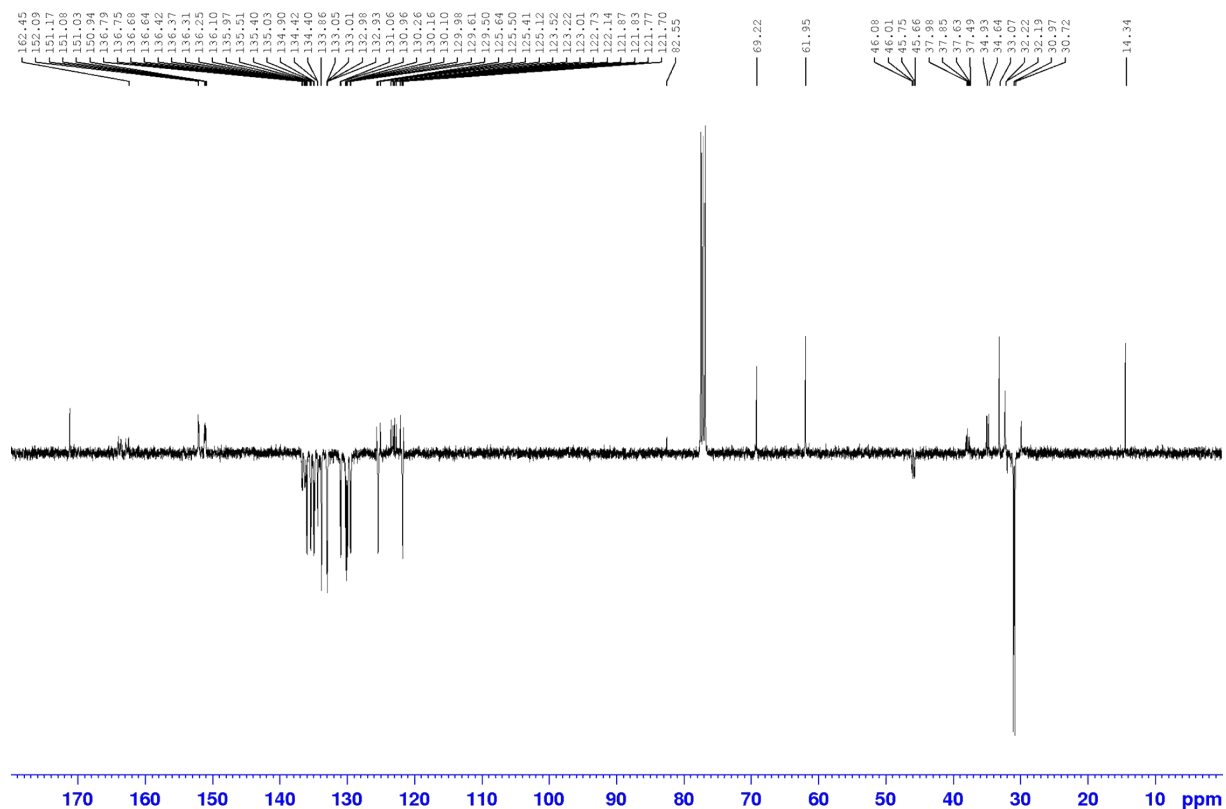

$^{13}\text{C}\{^1\text{H}\}$  Jmod NMR spectrum of complex **3** in  $\text{CDCl}_3$

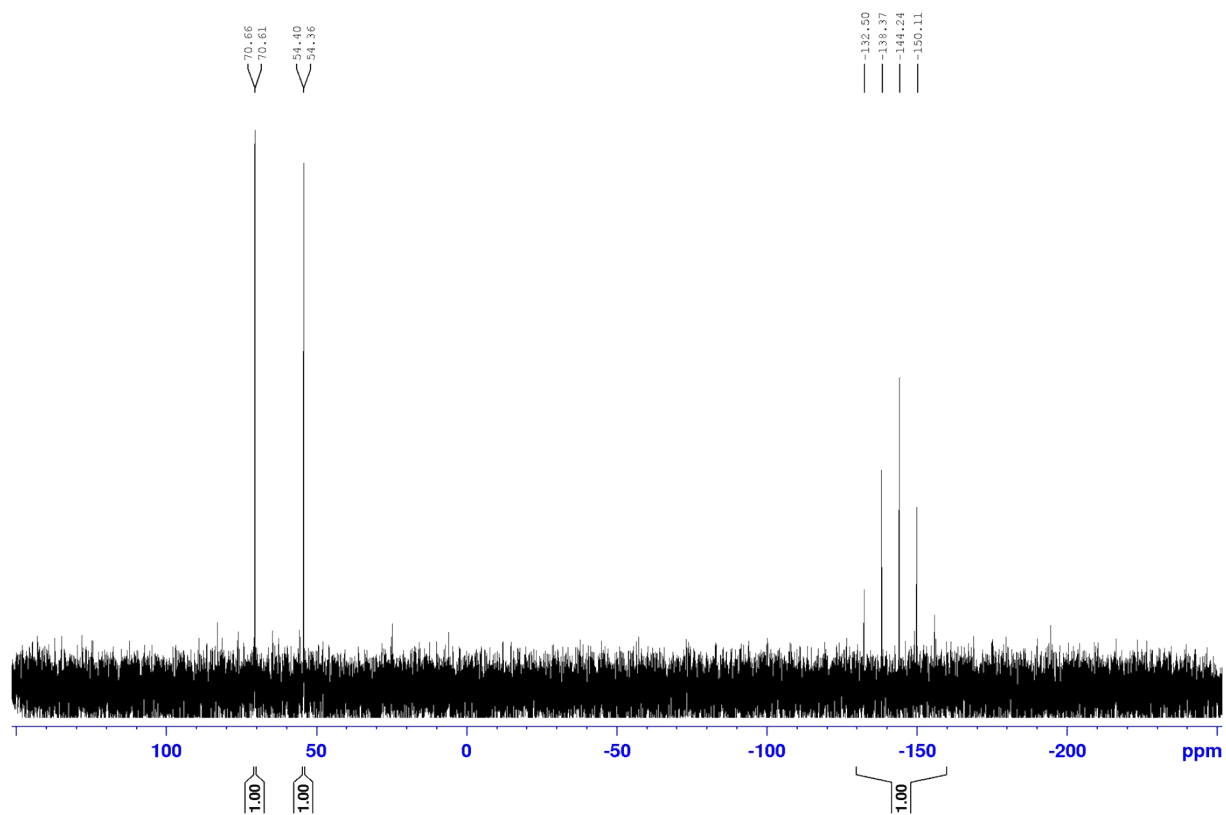

$^{31}\text{P}\{^1\text{H}\}$  NMR spectrum of complex **3** in  $\text{CDCl}_3$

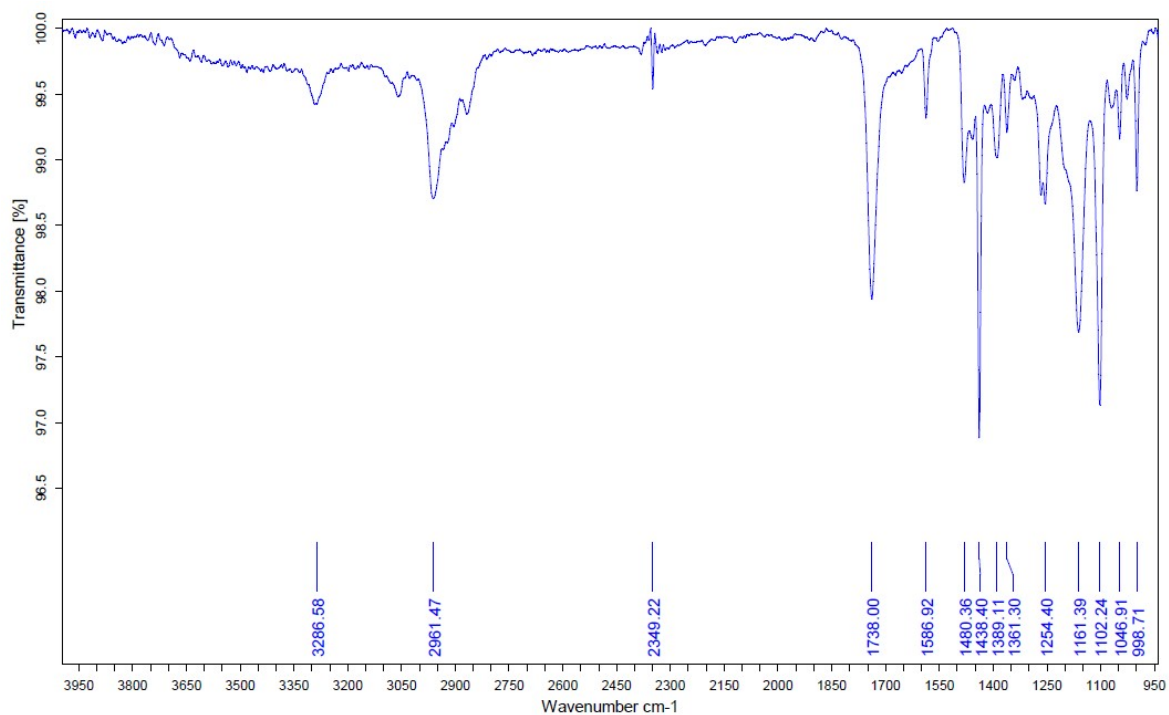

FT-IR (ATR mode) of complex 3.



**Table S3.** Cartesian coordinates (x,y,z) of optimized geometries of compounds studied in this work.

|            |           |           |           |              |           |           |           |
|------------|-----------|-----------|-----------|--------------|-----------|-----------|-----------|
| <b>1</b>   |           |           |           | H            | -3.247789 | -1.251176 | -4.192834 |
| AuC46P2H46 |           |           |           | H            | -4.082628 | -3.595861 | -4.285968 |
| Au         | 0.000415  | 0.184688  | 0.067514  | C            | -2.895313 | -1.291779 | 1.707324  |
| C          | 1.34158   | 1.720648  | -0.295424 | C            | -4.208818 | -1.755538 | 1.567706  |
| C          | 0.727687  | 2.934975  | -0.672304 | C            | -2.520792 | -0.582007 | 2.857117  |
| C          | 2.726159  | 1.640648  | -0.211202 | C            | -5.135695 | -1.520346 | 2.582959  |
| C          | 1.540045  | 4.026532  | -0.977245 | H            | -4.514521 | -2.294625 | 0.668193  |
| C          | -0.735715 | 2.931584  | -0.675817 | C            | -3.451192 | -0.354237 | 3.867139  |
| C          | 3.555234  | 2.741325  | -0.512661 | H            | -1.502202 | -0.196349 | 2.957741  |
| H          | 3.204476  | 0.713056  | 0.107286  | C            | -4.758127 | -0.825568 | 3.731342  |
| C          | 2.929908  | 3.928264  | -0.902854 | H            | -6.160556 | -1.881314 | 2.471644  |
| H          | 1.089728  | 4.977305  | -1.273544 | H            | -3.156439 | 0.200172  | 4.760783  |
| C          | -1.345187 | 1.716243  | -0.296068 | H            | -5.488525 | -0.64204  | 4.522696  |
| C          | -1.552685 | 4.016626  | -0.992147 | C            | 2.390908  | -2.252766 | -1.084521 |
| H          | 3.524718  | 4.807983  | -1.150656 | C            | 2.870904  | -3.570409 | -1.148757 |
| C          | -2.729763 | 1.628561  | -0.221257 | C            | 2.501946  | -1.416886 | -2.204114 |
| C          | -2.942558 | 3.910709  | -0.92677  | C            | 3.458608  | -4.038834 | -2.320901 |
| H          | -1.105942 | 4.967697  | -1.292844 | H            | 2.792307  | -4.239374 | -0.288816 |
| C          | -3.563496 | 2.721926  | -0.535099 | C            | 3.094289  | -1.89359  | -3.372639 |
| H          | -3.205739 | 0.700233  | 0.098242  | H            | 2.127165  | -0.39107  | -2.166328 |
| H          | -3.540822 | 4.785342  | -1.184192 | C            | 3.571464  | -3.201784 | -3.431952 |
| C          | -5.083577 | 2.567695  | -0.424713 | H            | 3.829689  | -5.065105 | -2.366174 |
| C          | -5.549691 | 1.409348  | -1.321388 | H            | 3.178119  | -1.237    | -4.24136  |
| C          | -5.452001 | 2.265551  | 1.037013  | H            | 4.031958  | -3.573945 | -4.350077 |
| C          | -5.820927 | 3.836957  | -0.857522 | C            | 2.915473  | -1.331792 | 1.668669  |
| H          | -5.294539 | 1.598523  | -2.375815 | C            | 4.24699   | -1.706597 | 1.454193  |
| H          | -5.094005 | 0.450659  | -1.030365 | C            | 2.542622  | -0.733779 | 2.881364  |
| H          | -6.642722 | 1.29106   | -1.251718 | C            | 5.194877  | -1.493629 | 2.455136  |
| H          | -5.135598 | 3.085884  | 1.699791  | H            | 4.549958  | -2.160274 | 0.507894  |
| H          | -6.54273  | 2.146735  | 1.138424  | C            | 3.494365  | -0.527414 | 3.875824  |
| H          | -4.980636 | 1.33909   | 1.398025  | H            | 1.507524  | -0.423099 | 3.049533  |
| H          | -6.906995 | 3.680672  | -0.771198 | C            | 4.820432  | -0.909098 | 3.663963  |
| H          | -5.560731 | 4.699437  | -0.225025 | H            | 6.233456  | -1.785808 | 2.284866  |
| H          | -5.605413 | 4.099724  | -1.904695 | H            | 3.200343  | -0.061302 | 4.818777  |
| C          | 5.075317  | 2.599933  | -0.386669 | H            | 5.566841  | -0.742741 | 4.444079  |
| C          | 5.430138  | 2.314738  | 1.08186   | H            | -1.224206 | -3.836742 | 1.5752    |
| C          | 5.560376  | 1.437192  | -1.267062 | H            | 1.227616  | -3.850615 | 1.542665  |
| C          | 5.807255  | 3.870836  | -0.823958 |              |           |           |           |
| H          | 5.100588  | 3.139226  | 1.732947  | <b>-S-Ph</b> |           |           |           |
| H          | 4.961009  | 1.388404  | 1.446017  | C6H5S        |           |           |           |
| H          | 6.520523  | 2.204691  | 1.196435  | C            | 0.599725  | 0         | 0.000034  |
| H          | 5.312708  | 1.612634  | -2.325618 | C            | -0.15947  | -1.200513 | 0.00001   |
| H          | 6.653791  | 1.330166  | -1.186468 | C            | -1.551359 | -1.199685 | 0.000002  |
| H          | 5.111479  | 0.477575  | -0.969246 | C            | -2.270739 | 0         | 0.000001  |
| H          | 6.893668  | 3.722429  | -0.728579 | C            | -1.55136  | 1.199684  | 0.000001  |
| H          | 5.597326  | 4.124051  | -1.874631 | C            | -0.15947  | 1.200513  | 0.000009  |
| H          | 5.537252  | 4.736513  | -0.200051 | H            | 0.388422  | -2.147652 | -0.000001 |
| P          | 1.612583  | -1.61211  | 0.428099  | H            | -2.086621 | -2.155484 | -0.000009 |
| P          | -1.612049 | -1.601492 | 0.454106  | H            | -3.363831 | 0         | -0.00001  |
| C          | -0.667647 | -2.998288 | 1.141026  | H            | -2.08662  | 2.155484  | -0.000011 |
| C          | 0.669152  | -3.005841 | 1.123365  | H            | 0.38842   | 2.147653  | -0.000003 |
| C          | -2.407882 | -2.254002 | -1.045176 | S            | 2.332267  | 0         | -0.000019 |
| C          | -2.873581 | -3.577201 | -1.10233  |              |           |           |           |
| C          | -2.541952 | -1.421546 | -2.165044 | <b>HS-Ph</b> |           |           |           |
| C          | -3.473949 | -4.052712 | -2.265359 | C6H6S        |           |           |           |
| H          | -2.771422 | -4.247279 | -0.245761 | C            | -0.513469 | 0.000733  | 0.000882  |
| C          | -3.146317 | -1.905488 | -3.324269 | C            | 0.191698  | 1.211088  | 0.00024   |
| H          | -2.173784 | -0.393118 | -2.135413 | C            | 1.585265  | 1.206378  | -0.000041 |
| C          | -3.61239  | -3.218086 | -3.375112 | C            | 2.292121  | 0.004061  | -0.000256 |
| H          | -3.83391  | -5.083187 | -2.304511 | C            | 1.589123  | -1.200734 | -0.000261 |
|            |           |           |           | C            | 0.19618   | -1.207939 | 0.000433  |
|            |           |           |           | H            | -0.347771 | 2.161608  | 0.000107  |

|              |           |           |           |             |           |           |           |
|--------------|-----------|-----------|-----------|-------------|-----------|-----------|-----------|
| H            | 2.122081  | 2.158507  | -0.000275 | H           | 1.022248  | 1.648251  | 2.295534  |
| H            | 3.384373  | 0.006101  | -0.000629 | C           | 2.973059  | 0.450704  | 4.814852  |
| H            | 2.128749  | -2.151228 | -0.000492 | H           | 4.100648  | -1.392776 | 4.747759  |
| H            | -0.343924 | -2.158398 | 0.000764  | H           | 1.744918  | 2.21507   | 4.592619  |
| S            | -2.279933 | -0.083967 | -0.000355 | H           | 3.287878  | 0.698627  | 5.831426  |
| H            | -2.510087 | 1.245361  | 0.000227  | C           | 3.013355  | -0.214217 | -0.599731 |
| <b>1-SPH</b> |           |           |           | C           | 4.340511  | -0.20358  | -0.151415 |
| AuC52P2H51 S |           |           |           | C           | 2.744123  | 0.036097  | -1.952852 |
| Au           | -0.477818 | 0.499254  | -0.089703 | C           | 5.381925  | 0.037271  | -1.047112 |
| C            | -2.236698 | 1.378093  | -0.764237 | H           | 4.569353  | -0.376557 | 0.902185  |
| C            | -2.100664 | 2.747487  | -1.087784 | C           | 3.786748  | 0.279056  | -2.843398 |
| C            | -3.460786 | 0.749434  | -0.970805 | H           | 1.711661  | 0.051312  | -2.309788 |
| C            | -3.212521 | 3.442271  | -1.565162 | C           | 5.107322  | 0.275428  | -2.393048 |
| C            | -0.761462 | 3.317105  | -0.916288 | H           | 6.413445  | 0.042201  | -0.687138 |
| C            | -4.58911  | 1.44024   | -1.46197  | H           | 3.565062  | 0.478032  | -3.894579 |
| H            | -3.558511 | -0.317012 | -0.760808 | H           | 5.924555  | 0.4692    | -3.092143 |
| C            | -4.438023 | 2.800641  | -1.742723 | C           | -2.153859 | -1.088324 | 2.459079  |
| H            | -3.128637 | 4.502497  | -1.817969 | C           | -1.55309  | -1.474013 | 3.66211   |
| C            | 0.245019  | 2.410044  | -0.515433 | C           | -3.311871 | -0.297353 | 2.498839  |
| C            | -0.425504 | 4.657019  | -1.114642 | C           | -2.110564 | -1.097945 | 4.884559  |
| H            | -5.279028 | 3.383807  | -2.11978  | H           | -0.634001 | -2.06564  | 3.620845  |
| C            | 1.540725  | 2.878459  | -0.319401 | C           | -3.86475  | 0.081256  | 3.720458  |
| C            | 0.879003  | 5.107061  | -0.910303 | H           | -3.784661 | 0.035355  | 1.572074  |
| H            | -1.190424 | 5.374317  | -1.423712 | C           | -3.267532 | -0.320919 | 4.91671   |
| C            | 1.890257  | 4.232176  | -0.504799 | H           | -1.633419 | -1.410582 | 5.816984  |
| H            | 2.327079  | 2.185563  | -0.014861 | H           | -4.765745 | 0.699674  | 3.737572  |
| H            | 1.094351  | 6.164347  | -1.070025 | H           | -3.702028 | -0.021256 | 5.873803  |
| C            | 3.334552  | 4.683427  | -0.262027 | C           | -2.663077 | -2.4785   | -0.040661 |
| C            | 3.74291   | 4.341082  | 1.179834  | C           | -3.799655 | -3.010721 | 0.580618  |
| C            | 4.264276  | 3.953061  | -1.243538 | C           | -2.428147 | -2.77083  | -1.393081 |
| C            | 3.507752  | 6.190732  | -0.463556 | C           | -4.684183 | -3.818253 | -0.138094 |
| H            | 3.091185  | 4.851864  | 1.905997  | H           | -3.99626  | -2.80163  | 1.634811  |
| H            | 3.686449  | 3.260364  | 1.37872   | C           | -3.314135 | -3.57025  | -2.109213 |
| H            | 4.780427  | 4.660635  | 1.369174  | H           | -1.534663 | -2.37494  | -1.885816 |
| H            | 4.000802  | 4.192087  | -2.285798 | C           | -4.44548  | -4.098404 | -1.481866 |
| H            | 5.310948  | 4.256508  | -1.0781   | H           | -5.56462  | -4.231798 | 0.360406  |
| H            | 4.209345  | 2.860772  | -1.126407 | H           | -3.120188 | -3.785603 | -3.162907 |
| H            | 4.554874  | 6.471845  | -0.272111 | H           | -5.139198 | -4.72942  | -2.042895 |
| H            | 3.266239  | 6.497998  | -1.492749 | H           | 2.118449  | -2.89974  | 1.017828  |
| H            | 2.876176  | 6.772291  | 0.22581   | H           | -0.202273 | -3.573248 | 1.614601  |
| C            | -5.908267 | 0.690574  | -1.67896  | S           | 1.360905  | -3.118298 | -1.262759 |
| C            | -5.696399 | -0.404755 | -2.736235 | C           | 3.039473  | -3.661618 | -1.462031 |
| C            | -6.359937 | 0.045501  | -0.359242 | C           | 3.644404  | -4.504042 | -0.516299 |
| C            | -7.0242   | 1.619603  | -2.163373 | C           | 3.754544  | -3.309326 | -2.614419 |
| H            | -5.380749 | 0.032438  | -3.696484 | C           | 4.949024  | -4.955333 | -0.707365 |
| H            | -4.930025 | -1.13032  | -2.425617 | H           | 3.082831  | -4.826235 | 0.36449   |
| H            | -6.633307 | -0.960046 | -2.90569  | C           | 5.049665  | -3.785782 | -2.813298 |
| H            | -6.500918 | 0.806303  | 0.424635  | H           | 3.289542  | -2.653894 | -3.353382 |
| H            | -7.318086 | -0.480352 | -0.499587 | C           | 5.655992  | -4.600727 | -1.857312 |
| H            | -5.631499 | -0.693321 | 0.006649  | H           | 5.409031  | -5.606828 | 0.040251  |
| H            | -7.952007 | 1.04286   | -2.299674 | H           | 5.592867  | -3.506846 | -3.719971 |
| H            | -7.23468  | 2.42134   | -1.438573 | H           | 6.674658  | -4.965137 | -2.010666 |
| H            | -6.780399 | 2.085875  | -3.130338 | P           | 1.608927  | -0.577439 | 0.51286   |
| P            | -1.348737 | -1.561382 | 0.870678  | <b>2f</b>   |           |           |           |
| C            | 1.280994  | -2.401061 | 0.505007  | AuC52P2H52S |           |           |           |
| C            | 0.007553  | -2.582958 | 1.193495  | Au          | 0.240409  | -0.890448 | -0.029409 |
| C            | 2.163459  | -0.190143 | 2.208463  | C           | 1.838149  | -2.201999 | 0.100835  |
| C            | 3.028299  | -1.041307 | 2.913389  | C           | 1.454044  | -3.552325 | 0.258563  |
| C            | 1.705585  | 0.981092  | 2.826903  | C           | 3.18535   | -1.859115 | 0.110817  |
| C            | 3.42865   | -0.720828 | 4.208578  | C           | 2.450106  | -4.513443 | 0.42852   |
| H            | 3.394603  | -1.96494  | 2.458696  | C           | 0.014091  | -3.813036 | 0.218303  |
| C            | 2.111732  | 1.299721  | 4.122495  | C           | 4.198787  | -2.825449 | 0.284716  |
|              |           |           |           | H           | 3.488525  | -0.82061  | -0.031717 |

|   |           |           |           |             |           |           |           |
|---|-----------|-----------|-----------|-------------|-----------|-----------|-----------|
| C | 3.79831   | -4.154371 | 0.443396  | C           | 2.053813  | 3.307639  | 1.517355  |
| H | 2.17969   | -5.564798 | 0.55519   | C           | 2.354595  | 1.061653  | 2.380377  |
| C | -0.808169 | -2.676413 | 0.065609  | C           | 2.46624   | 3.828298  | 2.741754  |
| C | -0.589179 | -5.068148 | 0.290355  | H           | 1.77743   | 3.996402  | 0.715518  |
| H | 4.541811  | -4.940156 | 0.581717  | C           | 2.772456  | 1.590421  | 3.600347  |
| C | -2.185263 | -2.826733 | -0.037224 | H           | 2.310177  | -0.02274  | 2.249256  |
| C | -1.975049 | -5.202636 | 0.201408  | C           | 2.827609  | 2.971599  | 3.781999  |
| H | 0.024328  | -5.964784 | 0.409967  | H           | 2.50444   | 4.910876  | 2.882166  |
| C | -2.804064 | -4.091329 | 0.027842  | H           | 3.050897  | 0.916722  | 4.413633  |
| H | -2.824024 | -1.952771 | -0.179239 | H           | 3.15013   | 3.384131  | 4.740846  |
| H | -2.402733 | -6.204011 | 0.261364  | C           | 2.864123  | 1.271247  | -1.425266 |
| C | -4.327375 | -4.194599 | -0.095976 | C           | 4.02275   | 2.009762  | -1.155917 |
| C | -4.990492 | -3.37799  | 1.02508   | C           | 2.731262  | 0.59785   | -2.648429 |
| C | -4.762684 | -3.639    | -1.461532 | C           | 5.03382   | 2.083814  | -2.113774 |
| C | -4.813087 | -5.641632 | 0.011449  | H           | 4.140285  | 2.527236  | -0.200887 |
| H | -4.698064 | -3.758466 | 2.01626   | C           | 3.743334  | 0.680811  | -3.600538 |
| H | -4.717966 | -2.312307 | 0.978663  | H           | 1.840158  | -0.0025   | -2.855294 |
| H | -6.087331 | -3.444083 | 0.944931  | C           | 4.893636  | 1.42588   | -3.334759 |
| H | -4.301124 | -4.209033 | -2.282847 | H           | 5.937046  | 2.660038  | -1.90087  |
| H | -5.856928 | -3.710839 | -1.569765 | H           | 3.636761  | 0.154571  | -4.551667 |
| H | -4.484702 | -2.581693 | -1.586028 | H           | 5.688649  | 1.486222  | -4.081602 |
| H | -5.909258 | -5.670644 | -0.084048 | H           | -0.882707 | 2.685075  | 0.842189  |
| H | -4.394622 | -6.275515 | -0.785452 | H           | 0.657201  | 3.381848  | -1.030793 |
| H | -4.553175 | -6.091031 | 0.982328  | S           | -2.321739 | 3.44866   | -0.936365 |
| C | 5.668057  | -2.392643 | 0.281707  | C           | -1.621457 | 5.034975  | -0.518583 |
| C | 6.007408  | -1.776701 | -1.084751 | C           | -1.133607 | 5.850479  | -1.545286 |
| C | 5.900075  | -1.350265 | 1.386972  | C           | -1.607218 | 5.490904  | 0.805506  |
| C | 6.611986  | -3.571368 | 0.529392  | C           | -0.631033 | 7.117012  | -1.245827 |
| H | 5.859648  | -2.50932  | -1.893446 | H           | -1.152446 | 5.490213  | -2.576459 |
| H | 5.382973  | -0.898523 | -1.306866 | C           | -1.087446 | 6.749579  | 1.098646  |
| H | 7.060418  | -1.452571 | -1.10619  | H           | -2.007738 | 4.862222  | 1.605032  |
| H | 5.657846  | -1.765308 | 2.377905  | C           | -0.602562 | 7.564947  | 0.074043  |
| H | 6.956216  | -1.037078 | 1.397902  | H           | -0.256079 | 7.753873  | -2.05056  |
| H | 5.28908   | -0.447043 | 1.239225  | H           | -1.074668 | 7.101843  | 2.132881  |
| H | 7.653861  | -3.216315 | 0.527654  | H           | -0.205048 | 8.555655  | 0.306705  |
| H | 6.425019  | -4.048569 | 1.503855  | H           | 0.076236  | 2.036786  | -2.019456 |
| H | 6.523987  | -4.340116 | -0.253595 | P           | -1.70895  | 0.597238  | -0.009554 |
| P | 1.472789  | 1.199173  | -0.255963 | <b>dppv</b> |           |           |           |
| C | -1.061132 | 2.347985  | -0.193181 | C26P2H22    |           |           |           |
| C | 0.240334  | 2.363489  | -0.979257 | P           | 1.601528  | -0.462015 | 0.547104  |
| C | -2.638122 | 0.59567   | 1.553693  | P           | -1.769389 | -0.660028 | 0.656371  |
| C | -3.545323 | 1.622944  | 1.865454  | C           | -0.768919 | -1.056353 | -0.831731 |
| C | -2.411739 | -0.431114 | 2.48166   | C           | 0.570436  | -0.970294 | -0.878777 |
| C | -4.218697 | 1.609536  | 3.084427  | C           | -1.985898 | 1.160453  | 0.455741  |
| H | -3.719972 | 2.438578  | 1.158683  | C           | -2.477865 | 1.75011   | -0.719217 |
| C | -3.091931 | -0.436265 | 3.698314  | C           | -1.596294 | 1.984587  | 1.517801  |
| H | -1.704421 | -1.232586 | 2.257094  | C           | -2.575599 | 3.135192  | -0.825089 |
| C | -3.99579  | 0.58049   | 3.999928  | H           | -2.790384 | 1.119799  | -1.556319 |
| H | -4.923375 | 2.410672  | 3.318835  | C           | -1.694319 | 3.373493  | 1.411483  |
| H | -2.908974 | -1.241012 | 4.4137    | H           | -1.205674 | 1.533033  | 2.43389   |
| H | -4.527365 | 0.574134  | 4.954459  | C           | -2.182677 | 3.949266  | 0.240704  |
| C | -2.842796 | 0.341077  | -1.411208 | H           | -2.960152 | 3.584577  | -1.744343 |
| C | -4.23175  | 0.463987  | -1.282311 | H           | -1.385017 | 4.005864  | 2.247307  |
| C | -2.284857 | 0.022886  | -2.659146 | H           | -2.25888  | 5.03619   | 0.155152  |
| C | -5.05022  | 0.2858    | -2.396527 | C           | -3.404369 | -1.320279 | 0.133854  |
| H | -4.682159 | 0.688386  | -0.313308 | C           | -4.595732 | -0.63143  | 0.404538  |
| C | -3.108615 | -0.146154 | -3.76845  | C           | -3.486252 | -2.606354 | -0.422218 |
| H | -1.204403 | -0.110495 | -2.767379 | C           | -5.83164  | -1.204298 | 0.106927  |
| C | -4.491442 | -0.012972 | -3.638241 | H           | -4.559387 | 0.367891  | 0.846019  |
| H | -6.133177 | 0.379211  | -2.289613 | C           | -4.722769 | -3.17556  | -0.724057 |
| H | -2.668603 | -0.39391  | -4.736873 | H           | -2.574632 | -3.177821 | -0.621276 |
| H | -5.137198 | -0.152827 | -4.508237 | C           | -5.900707 | -2.476133 | -0.461779 |
| C | 1.997992  | 1.917899  | 1.328077  | H           | -6.748699 | -0.648617 | 0.319407  |

|                  |           |           |           |                    |           |           |           |
|------------------|-----------|-----------|-----------|--------------------|-----------|-----------|-----------|
| H                | -4.764301 | -4.175239 | -1.164206 | H                  | 1.068606  | -1.997527 | -4.709441 |
| H                | -6.870035 | -2.922407 | -0.69697  | H                  | 2.523156  | -3.778665 | -3.751094 |
| C                | 2.22231   | 1.179639  | -0.016861 | C                  | 3.386947  | 1.528204  | -0.222017 |
| C                | 1.475058  | 2.006627  | -0.865822 | C                  | 4.496148  | 1.657125  | -1.075285 |
| C                | 3.422611  | 1.673415  | 0.518738  | C                  | 3.568704  | 1.767428  | 1.146981  |
| C                | 1.923323  | 3.290171  | -1.18135  | C                  | 5.750223  | 1.991304  | -0.572366 |
| H                | 0.530438  | 1.648761  | -1.28324  | H                  | 4.376421  | 1.487648  | -2.149707 |
| C                | 3.870858  | 2.952598  | 0.197621  | C                  | 4.825556  | 2.112415  | 1.649137  |
| H                | 4.018248  | 1.04859   | 1.190678  | H                  | 2.730318  | 1.688051  | 1.842149  |
| C                | 3.122567  | 3.766747  | -0.654676 | C                  | 5.92006   | 2.221796  | 0.794628  |
| H                | 1.327256  | 3.91984   | -1.847    | H                  | 6.60114   | 2.077037  | -1.253089 |
| H                | 4.81146   | 3.317216  | 0.618664  | H                  | 4.945901  | 2.29267   | 2.720511  |
| H                | 3.47411   | 4.770749  | -0.904984 | H                  | 6.903269  | 2.488421  | 1.190005  |
| C                | 3.073561  | -1.537819 | 0.260441  | H                  | 1.406228  | -0.076142 | 1.094929  |
| C                | 3.919534  | -1.410379 | -0.851482 | H                  | 0.527216  | 1.46707   | 1.103471  |
| C                | 3.326979  | -2.553033 | 1.191427  | H                  | -0.282142 | -1.02869  | -0.495678 |
| C                | 4.991309  | -2.282796 | -1.02719  | S                  | -1.387289 | -0.707488 | 1.623441  |
| H                | 3.742832  | -0.616296 | -1.582483 | C                  | -0.410626 | -2.055892 | 2.230289  |
| C                | 4.399999  | -3.42838  | 1.014966  | C                  | -0.66665  | -2.452017 | 3.553173  |
| H                | 2.676626  | -2.656965 | 2.064731  | C                  | 0.542085  | -2.759198 | 1.482017  |
| C                | 5.232952  | -3.293886 | -0.094275 | C                  | 0.009436  | -3.534554 | 4.107771  |
| H                | 5.644114  | -2.173376 | -1.897075 | H                  | -1.400755 | -1.902676 | 4.148902  |
| H                | 4.586636  | -4.215381 | 1.749994  | C                  | 1.223678  | -3.835041 | 2.052479  |
| H                | 6.075595  | -3.976019 | -0.232931 | H                  | 0.766666  | -2.481075 | 0.450632  |
| H                | 1.085207  | -1.22384  | -1.815809 | C                  | 0.961913  | -4.231859 | 3.362222  |
| H                | -1.308208 | -1.387714 | -1.729621 | H                  | -0.205585 | -3.82968  | 5.137978  |
| <b>dppv-HSPH</b> |           |           |           | H                  | 1.967204  | -4.368957 | 1.454909  |
| <b>C32P2H28S</b> |           |           |           | H                  | 1.497653  | -5.076367 | 3.801468  |
| P                | 1.747462  | 1.200269  | -0.992636 | <b>TS1</b>         |           |           |           |
| P                | -1.610344 | 0.894899  | -0.996651 | <b>AuC52P2H51S</b> |           |           |           |
| C                | -0.516975 | -0.146371 | 0.12322   | Au                 | 0.356494  | 0.590417  | -0.129438 |
| C                | 0.772944  | 0.58848   | 0.483962  | C                  | -0.530038 | 2.363925  | -0.754911 |
| C                | -3.102993 | -0.140324 | -1.250688 | C                  | 0.366154  | 3.264664  | -1.361981 |
| C                | -3.072333 | -1.542105 | -1.223169 | C                  | -1.853374 | 2.748814  | -0.537807 |
| C                | -4.288739 | 0.493929  | -1.657061 | C                  | -0.108351 | 4.514816  | -1.772383 |
| C                | -4.198955 | -2.28512  | -1.575717 | C                  | 1.749913  | 2.802773  | -1.484732 |
| H                | -2.168993 | -2.07321  | -0.91664  | C                  | -2.335293 | 4.011418  | -0.925961 |
| C                | -5.415119 | -0.249861 | -2.001421 | H                  | -2.547122 | 2.058184  | -0.061627 |
| H                | -4.334907 | 1.585784  | -1.702514 | C                  | -1.434305 | 4.876638  | -1.561063 |
| C                | -5.374969 | -1.644052 | -1.961795 | H                  | 0.567653  | 5.225911  | -2.25416  |
| H                | -4.154902 | -3.376631 | -1.541428 | C                  | 2.024202  | 1.52912   | -0.936737 |
| H                | -6.329614 | 0.265198  | -2.306419 | C                  | 2.786029  | 3.514189  | -2.088725 |
| H                | -6.257387 | -2.228586 | -2.233268 | H                  | -1.765708 | 5.863478  | -1.893632 |
| C                | -2.181022 | 2.221316  | 0.144375  | C                  | 3.309967  | 1.007745  | -1.028789 |
| C                | -3.225653 | 2.078165  | 1.070128  | C                  | 4.073899  | 2.982897  | -2.159371 |
| C                | -1.501888 | 3.446632  | 0.072293  | H                  | 2.595102  | 4.500305  | -2.52001  |
| C                | -3.573755 | 3.135396  | 1.908366  | C                  | 4.366037  | 1.721102  | -1.636768 |
| H                | -3.773734 | 1.134911  | 1.131964  | H                  | 3.520094  | 0.012237  | -0.634223 |
| C                | -1.844616 | 4.500524  | 0.919997  | H                  | 4.853229  | 3.574947  | -2.640468 |
| H                | -0.697907 | 3.57397   | -0.658928 | C                  | 5.764424  | 1.098993  | -1.705416 |
| C                | -2.882289 | 4.346231  | 1.837917  | C                  | 6.266846  | 0.816562  | -0.280459 |
| H                | -4.389911 | 3.012033  | 2.624784  | C                  | 5.694852  | -0.215946 | -2.497698 |
| H                | -1.304782 | 5.448437  | 0.854261  | C                  | 6.772291  | 2.022729  | -2.393689 |
| H                | -3.158111 | 5.172942  | 2.497454  | H                  | 6.32836   | 1.74628   | 0.306831  |
| C                | 2.059262  | -0.403227 | -1.853237 | H                  | 5.606567  | 0.118761  | 0.255382  |
| C                | 2.87935   | -1.411705 | -1.32435  | H                  | 7.271964  | 0.365766  | -0.311477 |
| C                | 1.416021  | -0.626675 | -3.078109 | H                  | 5.34291   | -0.036259 | -3.525561 |
| C                | 3.04439   | -2.617542 | -2.003453 | H                  | 6.692371  | -0.681017 | -2.554937 |
| H                | 3.400111  | -1.24875  | -0.37645  | H                  | 5.015426  | -0.943501 | -2.030311 |
| C                | 1.577487  | -1.836684 | -3.755728 | H                  | 7.759922  | 1.537042  | -2.419648 |
| H                | 0.78084   | 0.156153  | -3.502164 | H                  | 6.484442  | 2.242653  | -3.433276 |
| C                | 2.391501  | -2.832908 | -3.219404 | H                  | 6.886901  | 2.978247  | -1.858786 |
| H                | 3.689113  | -3.393947 | -1.583281 | C                  | -3.786073 | 4.448539  | -0.693904 |

|   |           |           |           |            |           |           |           |
|---|-----------|-----------|-----------|------------|-----------|-----------|-----------|
| C | -4.476309 | 4.62785   | -2.056041 | C          | -2.327463 | -3.985169 | -1.888866 |
| C | -4.577446 | 3.422275  | 0.120384  | C          | -3.668152 | -3.886111 | -1.462081 |
| C | -3.806127 | 5.782583  | 0.069218  | C          | -1.902515 | -5.218377 | -2.426011 |
| H | -3.966706 | 5.382491  | -2.674213 | C          | -4.53606  | -4.972064 | -1.565073 |
| H | -4.486026 | 3.681397  | -2.618705 | H          | -4.029178 | -2.938132 | -1.056492 |
| H | -5.519898 | 4.954406  | -1.918234 | C          | -2.778452 | -6.294822 | -2.539313 |
| H | -4.129309 | 3.254197  | 1.112221  | H          | -0.864875 | -5.316741 | -2.755124 |
| H | -5.603678 | 3.788476  | 0.27798   | C          | -4.101973 | -6.183236 | -2.106289 |
| H | -4.649861 | 2.451364  | -0.392133 | H          | -5.570168 | -4.864874 | -1.224709 |
| H | -4.845111 | 6.105545  | 0.243036  | H          | -2.420037 | -7.236384 | -2.965439 |
| H | -3.312061 | 5.684187  | 1.048509  | H          | -4.786657 | -7.030731 | -2.190783 |
| H | -3.298329 | 6.585485  | -0.485449 |            |           |           |           |
| P | -1.61088  | -0.594289 | 0.671449  | <b>TS2</b> |           |           |           |
| P | 1.417387  | -1.34209  | 0.955524  | C38P2H33S2 |           |           |           |
| C | 0.161644  | -2.575476 | 1.164424  | P          | 1.420396  | 1.371346  | -1.26891  |
| C | -1.102927 | -2.342156 | 0.66664   | C          | -0.594189 | 0.071207  | 0.045018  |
| C | 2.041555  | -0.78556  | 2.582699  | C          | 0.894414  | 0.141117  | -0.142976 |
| C | 1.692743  | -1.481354 | 3.745983  | C          | -1.339602 | -2.052356 | -1.908996 |
| C | 2.852483  | 0.354644  | 2.676275  | C          | -1.674641 | -2.952033 | -0.871142 |
| C | 2.163124  | -1.051993 | 4.986327  | C          | -0.9221   | -2.57865  | -3.167448 |
| H | 1.039666  | -2.355089 | 3.676843  | C          | -1.576475 | -4.331461 | -1.085455 |
| C | 3.322591  | 0.778272  | 3.91808   | H          | -2.00857  | -2.569413 | 0.091443  |
| H | 3.11357   | 0.919821  | 1.777209  | C          | -0.856917 | -3.949173 | -3.360007 |
| C | 2.97991   | 0.07514   | 5.073724  | H          | -0.693536 | -1.900223 | -3.989531 |
| H | 1.885511  | -1.599931 | 5.890068  | C          | -1.174348 | -4.852853 | -2.321247 |
| H | 3.953497  | 1.667977  | 3.982976  | H          | -1.822406 | -5.033005 | -0.256379 |
| H | 3.345014  | 0.412174  | 6.047039  | H          | -0.538514 | -4.337687 | -4.34784  |
| C | 2.811752  | -2.23832  | 0.179927  | H          | -1.101103 | -5.916841 | -2.471444 |
| C | 4.061804  | -2.374154 | 0.795384  | C          | -3.183351 | 0.232153  | -1.736661 |
| C | 2.566789  | -2.873421 | -1.047608 | C          | -4.22388  | -0.730739 | -1.794923 |
| C | 5.058771  | -3.139145 | 0.18782   | C          | -3.513057 | 1.612267  | -1.702579 |
| H | 4.257682  | -1.893175 | 1.756508  | C          | -5.555191 | -0.326102 | -1.804938 |
| C | 3.568804  | -3.631348 | -1.648334 | H          | -3.990235 | -1.809766 | -1.825187 |
| H | 1.577662  | -2.800733 | -1.514709 | C          | -4.863746 | 2.022384  | -1.716609 |
| C | 4.814938  | -3.766824 | -1.032382 | H          | -2.701335 | 2.374459  | -1.65386  |
| H | 6.030215  | -3.246051 | 0.676539  | C          | -5.883606 | 1.03845   | -1.772372 |
| H | 3.371447  | -4.126072 | -2.602422 | H          | -6.350187 | -1.091457 | -1.865326 |
| H | 5.597044  | -4.365744 | -1.505373 | H          | -5.088768 | 3.095316  | -1.727139 |
| C | -1.880794 | -0.173323 | 2.435421  | H          | -6.923359 | 1.352385  | -1.77199  |
| C | -2.231644 | -1.150153 | 3.377416  | C          | 3.033103  | 0.645064  | -1.89324  |
| C | -1.735484 | 1.15732   | 2.850255  | C          | 4.271473  | 1.174138  | -1.454177 |
| C | -2.44704  | -0.796537 | 4.70819   | C          | 3.025316  | -0.464635 | -2.778908 |
| H | -2.328977 | -2.196071 | 3.077957  | C          | 5.464129  | 0.544322  | -1.856202 |
| C | -1.951986 | 1.506806  | 4.182644  | H          | 4.292727  | 2.009785  | -0.760119 |
| H | -1.442105 | 1.92769   | 2.132249  | C          | 4.219597  | -1.059152 | -3.207957 |
| C | -2.309516 | 0.53164   | 5.112593  | H          | 2.064873  | -0.895865 | -3.114341 |
| H | -2.720206 | -1.565939 | 5.434381  | C          | 5.448842  | -0.522025 | -2.738972 |
| H | -1.831597 | 2.546899  | 4.494531  | H          | 6.41472   | 0.945631  | -1.488292 |
| H | -2.47448  | 0.805355  | 6.157517  | H          | 4.185629  | -1.903606 | -3.905649 |
| C | -3.253179 | -0.413209 | -0.105611 | H          | 6.38028   | -1.021822 | -3.087617 |
| C | -4.413684 | -0.580702 | 0.660908  | C          | 1.848049  | 2.957052  | -0.466376 |
| C | -3.363106 | -0.132242 | -1.47501  | C          | 2.410577  | 3.007658  | 0.847473  |
| C | -5.669704 | -0.497686 | 0.058445  | C          | 1.568542  | 4.178168  | -1.12404  |
| H | -4.344408 | -0.779    | 1.732702  | C          | 2.648978  | 4.228517  | 1.46578   |
| C | -4.619271 | -0.039429 | -2.068141 | H          | 2.582037  | 2.074799  | 1.391481  |
| H | -2.464009 | 0.000862  | -2.077465 | C          | 1.833979  | 5.405135  | -0.506699 |
| C | -5.773239 | -0.229823 | -1.305372 | H          | 1.115178  | 4.158505  | -2.10388  |
| H | -6.568879 | -0.639572 | 0.662468  | C          | 2.377771  | 5.431947  | 0.792074  |
| H | -4.696173 | 0.177303  | -3.136013 | H          | 3.074085  | 4.252987  | 2.472389  |
| H | -6.756981 | -0.162022 | -1.776378 | H          | 1.615713  | 6.333349  | -1.032663 |
| H | 0.480997  | -3.595091 | 1.401134  | H          | 2.591176  | 6.406617  | 1.281639  |
| H | -1.895751 | -3.088426 | 0.790077  | H          | -0.846589 | -0.810104 | 0.649977  |
| S | -1.206728 | -2.643964 | -1.757426 | H          | 1.380352  | -0.848687 | -0.282374 |
|   |           |           |           | S          | -1.216302 | 1.558826  | 1.000952  |

|                           |           |           |           |   |           |           |           |
|---------------------------|-----------|-----------|-----------|---|-----------|-----------|-----------|
| C                         | -2.653711 | 0.807479  | 1.857852  | C | -5.465507 | 1.39556   | -0.895171 |
| C                         | -2.504081 | -0.344635 | 2.738472  | H | -4.503691 | -0.225599 | 0.149796  |
| C                         | -3.887762 | 1.470601  | 1.809924  | C | -4.152152 | 2.522323  | -2.570572 |
| C                         | -3.545983 | -0.681783 | 3.597532  | H | -2.1587   | 1.769557  | -2.879871 |
| H                         | -1.505703 | -0.788171 | 2.930146  | C | -5.347262 | 2.387512  | -1.864681 |
| C                         | -4.941461 | 1.065257  | 2.627495  | H | -6.400911 | 1.282111  | -0.339099 |
| H                         | -4.01864  | 2.336607  | 1.119061  | H | -4.051313 | 3.294225  | -3.339219 |
| C                         | -4.775493 | 0.008357  | 3.546859  | H | -6.187762 | 3.055356  | -2.074171 |
| H                         | -3.373399 | -1.483765 | 4.326213  | C | 1.102949  | -2.217072 | -0.624091 |
| H                         | -5.916469 | 1.58473   | 2.568876  | C | 1.030495  | -2.282476 | 0.772982  |
| H                         | -5.587275 | -0.269758 | 4.225253  | C | 0.770635  | -3.334713 | -1.398204 |
| P                         | -1.405759 | -0.211081 | -1.681903 | C | 0.621451  | -3.464519 | 1.384361  |
| H                         | 1.306157  | 0.168771  | 1.472537  | H | 1.277277  | -1.40241  | 1.380098  |
| C                         | 3.795807  | -3.954131 | 2.699963  | C | 0.370507  | -4.514886 | -0.778303 |
| C                         | 4.029674  | -2.881453 | 1.816255  | H | 0.818404  | -3.273834 | -2.490674 |
| C                         | 3.302233  | -1.696408 | 1.901958  | C | 0.295409  | -4.577752 | 0.612339  |
| C                         | 2.285234  | -1.555585 | 2.867575  | H | 0.547817  | -3.510257 | 2.474633  |
| C                         | 2.073654  | -2.612244 | 3.791335  | H | 0.113381  | -5.388611 | -1.383906 |
| C                         | 2.828345  | -3.787783 | 3.710519  | H | -0.026419 | -5.502922 | 1.099778  |
| H                         | 4.3787    | -4.88962  | 2.627809  | C | 3.472775  | -0.50236  | -1.057551 |
| H                         | 4.804782  | -2.967593 | 1.028791  | C | 4.417341  | -0.903879 | -2.009577 |
| H                         | 3.51187   | -0.867467 | 1.200179  | C | 3.895421  | 0.006939  | 0.175406  |
| H                         | 1.299781  | -2.511364 | 4.569765  | C | 5.77737   | -0.796762 | -1.731923 |
| H                         | 2.614894  | -4.610845 | 4.399815  | H | 4.083705  | -1.298773 | -2.975744 |
| S                         | 1.247104  | -0.072531 | 2.95939   | C | 5.257731  | 0.118684  | 0.442341  |
| <b>TS<sub>conc.</sub></b> |           |           |           | H | 3.15736   | 0.320652  | 0.928632  |
| <b>C32P2H28S</b>          |           |           |           | C | 6.196817  | -0.282224 | -0.506545 |
| P                         | 1.704228  | -0.714484 | -1.474665 | H | 6.512599  | -1.110919 | -2.478103 |
| P                         | -1.748494 | -0.459008 | -1.105994 | H | 5.585774  | 0.521462  | 1.405267  |
| C                         | -0.50415  | 0.810524  | -0.4881   | H | 7.265322  | -0.19256  | -0.289853 |
| C                         | 0.874944  | 0.685216  | -0.866974 | H | 1.474301  | 1.610925  | -0.903513 |
| C                         | -2.245766 | -1.392175 | 0.402297  | H | -0.870866 | 1.843214  | -0.624443 |
| C                         | -2.247429 | -0.874556 | 1.704397  | H | -0.369894 | 0.75403   | 0.672984  |
| C                         | -2.698463 | -2.699903 | 0.193032  | S | 0.95105   | 1.123187  | 2.267917  |
| C                         | -2.680924 | -1.657269 | 2.771165  | C | 1.010535  | 2.767583  | 1.65595   |
| H                         | -1.900356 | 0.145773  | 1.900764  | C | 2.206954  | 3.340284  | 1.178487  |
| C                         | -3.146906 | -3.478132 | 1.258984  | C | -0.154181 | 3.55992   | 1.597898  |
| H                         | -2.693665 | -3.114381 | -0.822177 | C | 2.231043  | 4.633039  | 0.661196  |
| C                         | -3.133048 | -2.958441 | 2.550891  | H | 3.132417  | 2.755564  | 1.225878  |
| H                         | -2.668565 | -1.243161 | 3.783578  | C | -0.124478 | 4.849006  | 1.074564  |
| H                         | -3.501377 | -4.49764  | 1.079041  | H | -1.094344 | 3.141689  | 1.975506  |
| H                         | -3.478088 | -3.567972 | 3.391469  | C | 1.066911  | 5.398125  | 0.600018  |
| C                         | -3.188367 | 0.677766  | -1.315656 | H | 3.178049  | 5.047984  | 0.300312  |
| C                         | -4.395034 | 0.545514  | -0.619792 | H | -1.048889 | 5.434985  | 1.040724  |
| C                         | -3.087749 | 1.667548  | -2.305149 | H | 1.088391  | 6.412373  | 0.191408  |

## References

- 1 B. David, U. Monkowius, J. Rust, C. W. Lehmann, L. Hyzak and F. Mohr, *Dalton Trans.*, 2014, **43**, 11059–11066.
- 2 Bruker, APEX III/ SAINT Bruker AXS Inc., Madison, Wisconsin, USA 2012.
- 3 G. M. Sheldrick, *Acta Cryst A*, 2015, **71**, 3–8.
- 4 G. M. Sheldrick, *Acta Cryst A*, 2008, **64**, 112–122.
- 5 G. M. Sheldrick, *Acta Cryst C*, 2015, **71**, 3–8.
- 6 O. V. Dolomanov, L. J. Bourhis, R. J. Gildea, J. A. K. Howard and H. Puschmann, *J. Appl. Cryst.*, 2009, **42**, 339–341.
- 7 M. J. Frisch, G. W. Trucks, H. B. Schlegel, G. E. Scuseria, M. A. Robb, J. R. Cheeseman, G. Scalmani, V. Barone, B. Mennucci, G. A. Petersson, H. Nakatsuji, M. Caricato, X. Li, H. P. Hratchian, A. F. Izmaylov, J. Bloino, G. Zheng, J. L. Sonnenberg, M. Hada, M. Ehara, K. Toyota, R. Fukuda, J. Hasegawa, M. Ishida, T. Nakajima, Y. Honda, O. Kitao, H. Nakai, T. Vreven, J. A. Montgomery, Jr., J. E. Peralta, F. Ogliaro, M. Bearpark, J. J. Heyd, E. Brothers, K. N. Kudin, V. N. Staroverov, R. Kobayashi, J. Normand, K. Raghavachari, A. Rendell, J. C. Burant, S. S. Iyengar, J. Tomasi, M. Cossi, N. Rega, J. M. Millam, M. Klene, J. E. Knox, J. B. Cross, V. Bakken, C. Adamo, J. Jaramillo, R. Gomperts, R. E. Stratmann, O. Yazyev, A. J. Austin, R. Cammi, C. Pomelli, J. W. Ochterski, R. L. Martin, K. Morokuma, V. G. Zakrzewski, G. H. Voth, P. Salvador, J. J. Dannenberg, S. Dapprich, A. D. Daniels, Ö. Farkas, J. B. Foresman, J. V. Ortiz, J. Cioslowski and D. J. Fox, Gaussian 09, Revision D.01 Gaussian, Inc., Wallingford CT 2016.
- 8 C. Adamo and V. Barone, *J. Chem Phys*, 1999, **110**, 6158–6170.
- 9 J. P. Perdew, M. Ernzerhof and K. Burke, *J. Chem Phys*, 1996, **105**, 9982–9985.
- 10 A. Schäfer, C. Huber and R. Ahlrichs, *J. Chem Phys*, 1994, **100**, 5829–5835.
- 11 J. Tomasi, B. Mennucci and R. Cammi, *Chem. Rev.*, 2005, **105**, 2999–3094.
